# Supplementary material for: Proposal for new halophile classification system based on Statistical Rarity definition of extremophiles
Source: Research Square preprint supplement (doi:10.21203/rs.3.rs-8012852/v1), 2025-11-24
Supplement: Supplementary file 1 [file 8f4dde1d0e50c7b834349149.xlsx]

## Sheet: ESM_1
Article: Proposal for new halophile classification system based on Statistical Rarity definition of extremophiles
Journal: Extremophiles
Authors: Ana Paula Muche Schiavo (ana.schiavo@alumni.usp.br), Roberta Almeida Vincenzi, Fabio Rodrigues
Affiliation: Institute of Chemistry, University of São Paulo
Moderate	Domain	Min opt	Max opt	Min sup	Max sup	Classif	NaCl?	Unit	Reference	Year	LPSN.DSMZ	Genus	Family	Order	Class	Phylum	Kingdom
Bacillus halotolerans	B	0.5	0.5	0	12	Tolerant	Sea salts	p	Delaporte and Sasson 1967 / Ruiz-García et al 2005 / Tindall 2017	1967	https://lpsn.dsmz.de/species/bacillus-halotolerans	Bacillus	Bacillaceae	Caryophanales	Bacilli	Bacillota	Bacillati
Nesterenkonia halobia	B	1	2	1	4	Moderate	s	m	Onishi and Kamekura 1972 / Stackebrandt et al 1995	1972	https://lpsn.dsmz.de/species/nesterenkonia-halobia	Nesterenkonia	Micrococcaceae	Micrococcales	Actinomycetes	Actinomycetota	Bacillati
Marinococcus halophilus	B	1	2	0	5.5	No Class	s	m	Novitsky and Kushner 1976	1976	https://lpsn.dsmz.de/species/marinococcus-halophilus	Marinococcus	Bacillaceae	Caryophanales	Bacilli	Bacillota	Bacillati
Jeotgalibacillus marinus	B	1	3.5	0	7	Moderate	s	p	Ruger and Richter 1979 / Yoon et al 2010	1979	https://lpsn.dsmz.de/species/jeotgalibacillus-marinus	Jeotgalibacillus	Caryophanaceae	Caryophanales	Bacilli	Bacillota	Bacillati
Halomonas elongata	B	3.5	8	0	32	Extreme	s	p	Vreeland et al 1980	1980	https://lpsn.dsmz.de/species/halomonas-elongata	Halomonas	Halomonadaceae	Oceanospirillales	Gammaproteobacteria	Pseudomonadota	Pseudomonadati
Vibrio alginolyticus	B	13	13	0	15	No Class	s	p	Emond et al. 1983	1983	https://lpsn.dsmz.de/species/vibrio-alginolyticus	Vibrio	Vibrionaceae	Vibrionales	Gammaproteobacteria	Pseudomonadota	Pseudomonadati
Halorubrum sodomense	A	1.7	2.5	0.5	4.3	No Class	s	m	Oren 1983	1983	https://lpsn.dsmz.de/species/halorubrum-sodomense	Halorubrum	Haloferacaceae	Halobacteriales	Halobacteria	Methanobacteriota	Methanobacteriati
Rhodococcus marinonascens	B					Moderate	s	m	Helmke and Weyland 1984	1984	https://lpsn.dsmz.de/species/rhodococcus-marinonascens	Rhodococcus	Nocardiaceae	Mycobacteriales	Actinomycetes	Actinomycetota	Bacillati
Haloferax denitrificans	A	2	3	1.5	4.5	Extreme	s	m	Tomlinson et al 1986 / Tindall et al 1989	1986	https://lpsn.dsmz.de/species/haloferax-denitrificans	Haloferax	Haloferacaceae	Halobacteriales	Halobacteria	Methanobacteriota	Methanobacteriati
Haloarcula hispanica	A					Extreme	s	m	Juez et al. 1986	1986	https://lpsn.dsmz.de/species/haloarcula-hispanica	Haloarcula	Haloarculaceae	Halobacteriales	Halobacteria	Methanobacteriota	Methanobacteriati
Pseudoalteromonas denitrificans	B	2.5	2.5	1.5	5.5	No Class	s	p	Enger et al 1987	1987	https://lpsn.dsmz.de/species/pseudoalteromonas-denitrificans	Pseudoalteromonas	Pseudoalteromonadaceae	Alteromonadales	Gammaproteobacteria	Pseudomonadota	Pseudomonadati
Cobetia marina	B	7	7	0	20	Tolerant	s	p	Hebert and Vreeland 1987 / Arahal et al 2002 / Romanenko et al 2013	1987	https://lpsn.dsmz.de/species/cobetia-marina	Cobetia	Halomonadaceae	Oceanospirillales	Gammaproteobacteria	Pseudomonadota	Pseudomonadati
Halomonas subglaciescola	B			0.5	20	Tolerant	s	p	Franzmann et al 1987	1987	https://lpsn.dsmz.de/species/halomonas-subglaciescola	Halomonas	Halomonadaceae	Oceanospirillales	Gammaproteobacteria	Pseudomonadota	Pseudomonadati
Methanosalsum zhilinae	A	0.7	0.7	0.2	2.1	No Class	s	m	Mathrani et al. 1988 / Boone and Baker 2002	1988	https://lpsn.dsmz.de/species/methanosalsum-zhilinae	Methanosalsum	Methanosarcinaceae	Methanosarcinales	Methanosarcinia	Methanobacteriota	Methanobacteriati
Methanohalophilus mahii	A	2	2	0.3	2.5	Moderate	s	m	Paterek e Smith 1988	1988	https://lpsn.dsmz.de/species/methanosalsum-zhilinae	Methanohalophilus	Methanosarcinaceae	Methanosarcinales	Methanosarcinia	Methanobacteriota	Methanobacteriati
Virgibacillus halodenitrificans	B	0.5	1.35	0.35	4.25	Moderate	s	m	Denariaz et al. 1989 / Yoon et al. 2004	1989	https://lpsn.dsmz.de/species/virgibacillus-halodenitrificans	Virgibacillus	Bacillaceae	Caryophanales	Bacilli	Bacillota	Bacillati
Mesophilobacter marinus	B	7	7			Moderate	Sais totais	p	Nishimura et al. 1989	1989	https://lpsn.dsmz.de/species/mesophilobacter-marinus	Mesophilobacter	Pseudomonadaceae	Pseudomonadales	Gammaproteobacteria	Pseudomonadota	Pseudomonadati
Chromohalobacter marismortui	B	10	10	1	30	No Class	Total salts	p	Ventosa et al 1989	1989	https://lpsn.dsmz.de/species/chromohalobacter-marismortui	Chromohalobacter	Halomonadaceae	Oceanospirillales	Gammaproteobacteria	Pseudomonadota	Pseudomonadati
Halovibrio variabilis	B			1.2	4.9	Extreme	s	m	Fendrich 1989 / Sorokin et al. 2006	1989	https://lpsn.dsmz.de/species/halovibrio-variabilis	Halovibrio	Halomonadaceae	Oceanospirillales	Gammaproteobacteria	Pseudomonadota	Pseudomonadati
Halomonas eurihalina	B	7.5	7.5	1.5	20	Moderate	s	p	Quesada et al. 1990 / Mellado et al. 1995	1990	https://lpsn.dsmz.de/species/halomonas-eurihalina	Halomonas	Halomonadaceae	Oceanospirillales	Gammaproteobacteria	Pseudomonadota	Pseudomonadati
Salinicoccus hispanicus	B	10	10	0.5	25	Moderate	s	p	Marquez et al. 1990 / Ventosa et al 1993	1990	https://lpsn.dsmz.de/species/salinicoccus-hispanicus	Salinicoccus	Staphylococcaceae	Caryophanales	Bacilli	Bacillota	Bacillati
Salinococcus hispanicus	B	10	10	0.5	25	Moderate	s	p	Marquez et al 1990	1990	https://lpsn.dsmz.de/species/salinicoccus-hispanicus	Salinococcus	Incertae sedis	Incertae sedis	Incertae sedis	Incertae sedis	Incertae sedis
Methanoculleus marisnigri	A	0.1	0.4	0	1	Tolerant	Na+	m	Maestrojuán et al 1990	1990	https://lpsn.dsmz.de/species/methanoculleus-marisnigri	Methanoculleus	Methanomicrobiaceae	Methanomicrobiales	Methanomicrobia	Methanobacteriota	Methanobacteriati
Methanolobus oregonensis	A	0.48	0.48	0.1	1.6	Tolerant	Na+	m	Liu et al 1990 / Boone 2002	1990	https://lpsn.dsmz.de/species/methanohalophilus-oregonensis	Methanolobus	Methanosarcinaceae	Methanosarcinales	Methanosarcinia	Methanobacteriota	Methanobacteriati
Haloarcula marismortui	A	3.4	3.9	1.7	5.1	Extreme	s	m	Mylvaganam e Denis 1992 / Oren et al. 1990 / Bowers e Wiegel 2011	1990	https://lpsn.dsmz.de/species/haloarcula-marismortui	Haloarcula	Haloarculaceae	Halobacteriales	Halobacteria	Methanobacteriota	Methanobacteriati
Hydrogenovibrio marinus	B	0.5	0.5			No Class	s	m	Nishihare et al 1991	1991	https://lpsn.dsmz.de/species/hydrogenovibrio-marinus	Hydrogenovibrio	Piscirickettsiaceae	Beggiatoales	Gammaproteobacteria	Pseudomonadota	Pseudomonadati
Halomonas halophila	B	5	5	2.5	20	Moderate	s	m	Valderrama et al. 1991 / Dobson and Franzmann 1996	1991	https://lpsn.dsmz.de/species/halomonas-halophila	Halomonas	Halomonadaceae	Oceanospirillales	Gammaproteobacteria	Pseudomonadota	Pseudomonadati
Desulfohalobium retbaense	B	10	10	0	24	No Class	s	p	Ollivier et al. 1991	1991	https://lpsn.dsmz.de/species/desulfohalobium-retbaense	Desulfohalobium	Desulfohalobiaceae	Desulfovibrionales	Deltaproteobacteria	Pseudomonadota	Pseudomonadati
Actinopolyspora mortivallis	B	10	15	5	30	Moderate	s	p	Yoshida et al 1991 / Ventosa et al. 1998	1991	https://lpsn.dsmz.de/species/actinopolyspora-mortivallis	Actinopolyspora	Pseudonocardiaceae	Pseudonocardiales	Actinomycetes	Actinomycetota	Bacillati
Methanohalophilus halophilus	A	0.6	2.5	0.3	3.5	Moderate	s	m	Wilham et al. 1991	1991	https://lpsn.dsmz.de/species/methanohalophilus-halophilus	Methanohalophilus	Methanosarcinaceae	Methanosarcinales	Methanosarcinia	Methanobacteriota	Methanobacteriati
Methanosarcina siciliae	A			0.1	1.1	Slight	Na+	m	Elberson and Sowers 1997	1991	https://lpsn.dsmz.de/species/methanosarcina-siciliae	Methanosarcina	Methanosarcinaceae	Methanosarcinales	Methanosarcinia	Methanobacteriota	Methanobacteriati
Marinobacter nauticus	B	0.6	0.6	0.08	3.5	Extreme	s	m	Gauthier et al 1992 / Tindall 2020	1992	https://lpsn.dsmz.de/species/marinobacter-nauticus	Marinobacter	Alteromonadaceae	Alteromonadales	Gammaproteobacteria	Pseudomonadota	Pseudomonadati
Psychroflexus gondwanensis	B	1	1	0	3	Moderate	s	m	Dobson et al 1993 / Bowman et al.1998	1993	https://lpsn.dsmz.de/species/psychroflexus-gondwanensis	Psychroflexus	Flavobacteriaceae	Flavobacteriales	Flavobacteriia	Bacteroidota	Pseudomonadati
Arhodomonas aquaeolei	B	15	15	6	20	Moderate	s	p	Ventosa et al. 1998 / Adkins et al. 1993	1993	https://lpsn.dsmz.de/species/arhodomonas-aquaeolei	Arhodomonas	Ectothiorhodospiraceae	Chromatiales	Gammaproteobacteria	Pseudomonadota	Pseudomonadati
Methanohalophilus portucalensis	A	0.5	0.5	0.5	2	Moderate	s	m	Boone et al. 1993	1993	https://lpsn.dsmz.de/species/methanohalophilus-portucalensis	Methanohalophilus	Methanosarcinaceae	Methanosarcinales	Methanosarcinia	Methanobacteriota	Methanobacteriati
Halorubrum vacuolatum	A	20	20	15	30	No Class	s	p	Mwatha and Grant 1993	1993	https://lpsn.dsmz.de/species/halorubrum-vacuolatum	Halorubrum	Haloferacaceae	Halobacteriales	Halobacteria	Methanobacteriota	Methanobacteriati
Photobacterium damselae	B	2	2			No Class	s	p	Okuzumi et al. 1994	1994	https://lpsn.dsmz.de/species/photobacterium-damselae	Photobacterium	Vibrionaceae	Vibrionales	Gammaproteobacteria	Pseudomonadota	Pseudomonadati
Halanaerobium salsuginis	B	9	9	6	24	Moderate	s	p	Bhupathiraju et al 1994	1994	https://lpsn.dsmz.de/species/halanaerobium-salsuginis	Halanaerobium	Halanaerobiaceae	Halanaerobiales	Clostridia	Bacillota	Bacillati
Halothermothrix orenii	B	10	10	4	20	No Class	s	p	Cayol et al. 1994	1994	https://lpsn.dsmz.de/species/halothermothrix-orenii	Halothermothrix	Halanaerobiaceae	Halanaerobiales	Clostridia	Bacillota	Bacillati
Halanaerobium saccharolyticum	B	7.5	12.5	5	25	No Class	s	p	Cayol et al. 1994	1994	https://lpsn.dsmz.de/species/halanaerobium-saccharolyticum	Halanaerobium	Halanaerobiaceae	Halanaerobiales	Clostridia	Bacillota	Bacillati
Nocardiopsis halophila	B	5	15	0	25	No Class	s	p	Al-Tai et al. 1994 / Ventosa et al. 1998	1994	https://lpsn.dsmz.de/species/nocardiopsis-halophila	Nocardiopsis	Nocardiopsidaceae	Streptosporangiales	Actinomycetes	Actinomycetota	Bacillati
Saccharomonospora iraqiensis	B	10	15	5	20	Moderate	s	p	Ruan et al 1994 / Nouioui et al 2018 / Li et al 2003	1994	https://lpsn.dsmz.de/species/saccharomonospora-iraqiensis	Saccharomonospora	Pseudonocardiaceae	Pseudonocardiales	Actinomycetes	Actinomycetota	Bacillati
Methanolobus bombayensis	A	0.5	0.5	0.25	2	Slight	s	m	Kadam et al 1994	1994	https://lpsn.dsmz.de/species/methanolobus-bombayensis	Methanolobus	Methanosarcinaceae	Methanosarcinales	Methanosarcinia	Methanobacteriota	Methanobacteriati
Halococcus salifodinae	A	20	25	15	30	Extreme	s	p	Denner et al 1994	1994	https://lpsn.dsmz.de/species/halococcus-salifodinae	Halococcus	Halococcaceae	Halobacteriales	Halobacteria	Methanobacteriota	Methanobacteriati
Methanolobus taylorii	A			0.2	1.2	Slight	s	m	Oremland et al. 1994	1994	https://lpsn.dsmz.de/species/methanolobus-taylorii	Methanolobus	Methanosarcinaceae	Methanosarcinales	Methanosarcinia	Methanobacteriota	Methanobacteriati
Rhodovulum strictum	B	0.8	0.8	0.25	3	Slight	s	p	Hiraiashi e Ueda 1995	1995	https://lpsn.dsmz.de/species/rhodovulum-strictum	Rhodovulum	Roseobacteraceae	Rhodobacterales	Alphaproteobacteria	Pseudomonadota	Pseudomonadati
Rhodobium orientis	B	4	5	2	8	No Class	s	p	Hiraishi et al 1995	1995	https://lpsn.dsmz.de/species/rhodobium-orientis	Rhodobium	Rhodobiaceae	Hyphomicrobiales	Alphaproteobacteria	Pseudomonadota	Pseudomonadati
Halanaerobium alcaliphilum	B	10	10	2.5	25	Moderate	s	p	Tsai et al. 1995	1995	https://lpsn.dsmz.de/species/halanaerobium-alcaliphilum	Halanaerobium	Halanaerobiaceae	Halanaerobiales	Clostridia	Bacillota	Bacillati
Halanaerobium lacusrosei	B	180	200	60	340	Extreme	s	g	Cayol et al. 1995	1995	https://lpsn.dsmz.de/species/halanaerobium-lacusrosei	Halanaerobium	Halanaerobiaceae	Halanaerobiales	Clostridia	Bacillota	Bacillati
Methanolobus vulcani	A	0.5	0.5	0.1	1.2	Slight	s	m	Kadam and Boone 1995	1995	https://lpsn.dsmz.de/species/methanolobus-vulcani	Methanolobus	Methanosarcinaceae	Methanosarcinales	Methanosarcinia	Methanobacteriota	Methanobacteriati
Halobaculum gomorrense	A	1.5	2.5	1		Extreme	s	m	Oren et al 1995	1995	https://lpsn.dsmz.de/species/halobaculum-gomorrense	Halobaculum	Haloferacaceae	Halobacteriales	Halobacteria	Methanobacteriota	Methanobacteriati
Natronococcus amylolyticus	A	2.568	3.425	1.369	5.137	Extreme	s	m	Haruhiko et al. 1995	1995	https://lpsn.dsmz.de/species/natronococcus-amylolyticus	Natronococcus	Natrialbaceae	Halobacteriales	Halobacteria	Methanobacteriota	Methanobacteriati
Alkalispirochaeta alkalica	B	0.75	1.4	0.51	1.71	No Class	s	m	Zhilina et al 1996 / Sravanthi et al 2016	1996	https://lpsn.dsmz.de/species/alkalispirochaeta-alkalica	Alkalispirochaeta	Spirochaetaceae	Spirochaetales	Spirochaetia	Spirochaetota	Pseudomonadati
Oceanidesulfovibrio gabonensis	B	5	6	1	17	Moderate	s	p	Tardy-Jacquenod et al. 1996	1996	https://lpsn.dsmz.de/species/oceanidesulfovibrio-gabonensis	Oceanidesulfovibrio	Desulfovibrionaceae	Desulfovibrionales	Deltaproteobacteria	Pseudomonadota	Pseudomonadati
Spirochaeta asiatica	B	3	6	2	8	No Class	s	p	Zhilina et al 1996	1996	https://lpsn.dsmz.de/species/spirochaeta-asiatica	Spirochaeta	Spirochaetaceae	Spirochaetales	Spirochaetia	Spirochaetota	Pseudomonadati
Spirochaeta africana	B	7	7	3	10	No Class	s	p	Zhilina et al 1996	1996	https://lpsn.dsmz.de/species/spirochaeta-africana	Spirochaeta	Spirochaetaceae	Spirochaetales	Spirochaetia	Spirochaetota	Pseudomonadati
Halobacillus litoralis	B	10	10	0.5	25	Moderate	s	p	Spring et al. 1996	1996	https://lpsn.dsmz.de/species/halobacillus-litoralis	Halobacillus	Bacillaceae	Caryophanales	Bacilli	Bacillota	Bacillati
Halobacillus trueperi	B	10	10	0.5	30	Moderate	s	p	Spring et al. 1996	1996	https://lpsn.dsmz.de/species/halobacillus-trueperi	Halobacillus	Bacillaceae	Caryophanales	Bacilli	Bacillota	Bacillati
Alkalibacillus haloalkaliphilus	B			0	25	Moderate	s	p	Fritze 1996 / Jeon et al. 2005	1996	https://lpsn.dsmz.de/species/alkalibacillus-haloalkaliphilus	Alkalibacillus	Bacillaceae	Caryophanales	Bacilli	Bacillota	Bacillati
Desulfonatronovibrio hydrogenovorans	B	3	3	1	12	Slight	s	p	Zhilina et al 1997	1997	https://lpsn.dsmz.de/species/desulfonatronovibrio-hydrogenovorans	Desulfonatronovibrio	Desulfohalobiaceae	Desulfovibrionales	Deltaproteobacteria	Pseudomonadota	Pseudomonadati
Dethiosulfovibrio peptidovorans	B	3	3	0	11	Slight	s	p	Magot et al. 1997	1997	https://lpsn.dsmz.de/species/dethiosulfovibrio-peptidovorans	Dethiosulfovibrio	Dethiosulfovibrionaceae	Synergistales	Synergistia	Synergistota	Thermotogati
Thermonema rossianum	B	1	3	0	6	Slight	s	m	Tenreiro et al. 1997	1997	https://lpsn.dsmz.de/species/thermonema-rossianum	Thermonema	Thermonemataceae	Cytophagales	Cytophagia	Bacteroidota	Pseudomonadati
Pseudodesulfovibrio profundus	B	0.6	8	0.2	10	Moderate	s	p	Bale et al. 1997 / Cao et al 2016	1997	https://lpsn.dsmz.de/species/pseudodesulfovibrio-profundus	Pseudodesulfovibrio	Desulfovibrionaceae	Desulfovibrionales	Deltaproteobacteria	Pseudomonadota	Pseudomonadati
Halomonas desiderata	B	5	10	1	15	Moderate	s	p	Wu et al 2008 / Berendes et al 1997	1997	https://lpsn.dsmz.de/species/halomonas-desiderata	Halomonas	Halomonadaceae	Oceanospirillales	Gammaproteobacteria	Pseudomonadota	Pseudomonadati
Tetragenococcus muriaticus	B	7	10	1	25	Moderate	s	p	Satomi et al 1997	1997	https://lpsn.dsmz.de/species/tetragenococcus-muriaticus	Tetragenococcus	Enterococcaceae	Lactobacillales	Bacilli	Bacillota	Bacillati
Virgibacillus salexigens	B	10	10	7	20	Moderate	Total salts	p	Garabito et al. 1997 / Heyrman et al 2003	1997	https://lpsn.dsmz.de/species/virgibacillus-salexigens	Virgibacillus	Bacillaceae	Caryophanales	Bacilli	Bacillota	Bacillati
Pseudoalteromonas antarctica	B			9	12.5	Moderate	s	p	Bozal et al 1997	1997	https://lpsn.dsmz.de/species/pseudoalteromonas-antarctica	Pseudoalteromonas	Pseudoalteromonadaceae	Alteromonadales	Gammaproteobacteria	Pseudomonadota	Pseudomonadati
Methanogenium frigidum	A	0.35	0.6	0.1	0.85	Slight	Na+	m	Franzmann et al. 1997	1997	https://lpsn.dsmz.de/species/methanogenium-frigidum	Methanogenium	Methanomicrobiaceae	Methanomicrobiales	Methanomicrobia	Methanobacteriota	Methanobacteriati
Haloarcula argentinensis	A	2.5	3	2	4.5	Extreme	s	m	Ihara et al 1997	1997	https://lpsn.dsmz.de/species/haloarcula-argentinensis	Haloarcula	Haloarculaceae	Halobacteriales	Halobacteria	Methanobacteriota	Methanobacteriati
Halomicrobium mukohataei	A	3	3.5	2.5	4.5	Extreme	s	m	Ihara et al 1997 / Oren et al 2002 / Kharroub et al 2008	1997	https://lpsn.dsmz.de/species/halomicrobium-mukohataei	Halomicrobium	Haloarculaceae	Halobacteriales	Halobacteria	Methanobacteriota	Methanobacteriati
Natronomonas pharaonis	A	3.5	3.5	2	5.2	No Class	s	m	Kamekura et al 1997	1997	https://lpsn.dsmz.de/species/natronomonas-pharaonis	Natronomonas	Halobacteriaceae	Halobacteriales	Halobacteria	Methanobacteriota	Methanobacteriati
Marinospirillum megaterium	B	3	3	0.5	9	No Class	s	m	Satomi et al. 1998	1998	https://lpsn.dsmz.de/species/marinospirillum-megaterium	Marinospirillum	Oceanospirillaceae	Oceanospirillales	Gammaproteobacteria	Pseudomonadota	Pseudomonadati
Desulfohalotomaculum halophilum	B	6	6	1	14	Moderate	s	p	Tardy-Jacquenod et al. 1998 / Watanabe et al 2018	1998	https://lpsn.dsmz.de/species/desulfohalotomaculum-halophilum	Desulfohalotomaculum	Peptococcaceae	Eubacteriales	Clostridia	Bacillota	Bacillati
Glaciecola pallidula	B					No Class	s	m	Bowman et al. 1998	1998	https://lpsn.dsmz.de/species/glaciecola-pallidula	Glaciecola	Alteromonadaceae	Alteromonadales	Gammaproteobacteria	Pseudomonadota	Pseudomonadati
Glaciecola punicea	B					No Class	s	m	Bowman et al. 1998	1998	https://lpsn.dsmz.de/species/glaciecola-punicea	Glaciecola	Alteromonadaceae	Alteromonadales	Gammaproteobacteria	Pseudomonadota	Pseudomonadati
Natrinema pallidum	A	3.4	4.3	1.7	5.137	Extreme	s	m	McGenity et al 1998	1998	https://lpsn.dsmz.de/species/natrinema-pallidum	Natrinema	Natrialbaceae	Halobacteriales	Halobacteria	Methanobacteriota	Methanobacteriati
Natrinema pellirubrum	A	3.4	4.3	2	5.137	Extreme	s	m	McGenity et al 1998	1998	https://lpsn.dsmz.de/species/natrinema-pellirubrum	Natrinema	Natrialbaceae	Halobacteriales	Halobacteria	Methanobacteriota	Methanobacteriati
Methanocalculus halotolerans	A	5	5	0	12	Tolerant	s	p	Ollivier et al. 1998	1998	https://lpsn.dsmz.de/species/methanocalculus-halotolerans	Methanocalculus	Methanocalculaceae	Methanomicrobiales	Methanomicrobia	Methanobacteriota	Methanobacteriati
Halogeometricum borinquense	A	20	25	8	30	Extreme	s	p	Montalvo-Rodríguez et al 1998	1998	https://lpsn.dsmz.de/species/halogeometricum-borinquense	Halogeometricum	Haloferacaceae	Halobacteriales	Halobacteria	Methanobacteriota	Methanobacteriati
Gracilibacillus halotolerans	B	0	0	0	20	Tolerant	s	p	Waino et al 1999	1999	https://lpsn.dsmz.de/species/gracilibacillus-halotolerans	Gracilibacillus	Bacillaceae	Caryophanales	Bacilli	Bacillota	Bacillati
Thiorhodospira sibirica	B	0	0	0	60	Tolerant	s	g	Bryantseva et al 1999	1999	https://lpsn.dsmz.de/species/thiorhodospira-sibirica	Thiorhodospira	Ectothiorhodospiraceae	Chromatiales	Gammaproteobacteria	Pseudomonadota	Pseudomonadati
Cellulophaga baltica	B	2	2	1	5	Slight	Marine salts	p	Johansen et al 1999	1999	https://lpsn.dsmz.de/species/cellulophaga-baltica	Cellulophaga	Flavobacteriaceae	Flavobacteriales	Flavobacteriia	Bacteroidota	Pseudomonadati
Alcanivorax jadensis	B	3	3	0.5	15	Moderate	s	p	Bruns and Berthe-Corti 1999 / Fernandés-Martinéz et al 2003	1999	https://lpsn.dsmz.de/species/alcanivorax-jadensis	Alcanivorax	Alcanivoracaceae	Oceanospirillales	Gammaproteobacteria	Pseudomonadota	Pseudomonadati
Cellulophaga fucicola	B	2	3	1	5	Slight	Marine salts	p	Johansen et al 1999	1999	https://lpsn.dsmz.de/species/cellulophaga-fucicola	Cellulophaga	Flavobacteriaceae	Flavobacteriales	Flavobacteriia	Bacteroidota	Pseudomonadati
Fusibacter paucivorans	B	0	3	0	10	Tolerant	s	p	Ravot et al 1999	1999	https://lpsn.dsmz.de/species/fusibacter-paucivorans	Fusibacter	Incertae sedis	Eubacteriales	Clostridia	Bacillota	Bacillati
Desulfocella halophila	B	4	5	2	19	No Class	s	p	Brandt et al. 1999	1999	https://lpsn.dsmz.de/species/desulfocella-halophila	Desulfocella	Desulfobacteraceae	Desulfobacterales	Deltaproteobacteria	Pseudomonadota	Pseudomonadati
Virgibacillus marismortui	B	10	10	5	25	Moderate	Total salts	p	Arahal et al 1999 / Heyrman et al 2003	1999	https://lpsn.dsmz.de/species/virgibacillus-marismortui	Virgibacillus	Bacillaceae	Caryophanales	Bacilli	Bacillota	Bacillati
Halanaerobium kushneri	B	12	12	9	18	Moderate	s	p	Bhupathiraju et al. 1999	1999	https://lpsn.dsmz.de/species/halanaerobium-kushneri	Halanaerobium	Halanaerobiaceae	Halanaerobiales	Clostridia	Bacillota	Bacillati
Halanaerobacter salinarius	B	14	15	5	30	No Class	s	p	Mouné et al. 1999	1999	https://lpsn.dsmz.de/species/halanaerobacter-salinarius	Halanaerobacter	Halobacteroidaceae	Halanaerobiales	Clostridia	Bacillota	Bacillati
Haloterrigena turkmenica	A	3.4	3.4	2		No Class	s	m	Ventosa et al 1999	1999	https://lpsn.dsmz.de/species/haloterrigena-turkmenica	Haloterrigena	Natrialbaceae	Halobacteriales	Halobacteria	Methanobacteriota	Methanobacteriati
Haloarcula quadrata	A	3.9	3.9	2.7	4.3	No Class	s	m	Oren et al. 1999	1999	https://lpsn.dsmz.de/species/haloarcula-quadrata	Haloarcula	Haloarculaceae	Halobacteriales	Halobacteria	Methanobacteriota	Methanobacteriati
Natronorubrum tibetense	A	20	20	12	30	No Class	s	p	Xu et al 1999	1999	https://lpsn.dsmz.de/species/natronorubrum-tibetense	Natronorubrum	Natrialbaceae	Halobacteriales	Halobacteria	Methanobacteriota	Methanobacteriati
Natronorubrum bangense	A	22.5	22.5	12	25	No Class	s	p	Xu et al 1999	1999	https://lpsn.dsmz.de/species/natronorubrum-bangense	Natronorubrum	Natrialbaceae	Halobacteriales	Halobacteria	Methanobacteriota	Methanobacteriati
Salinivibrio costicola	B	2.5	2.5	0	12.5	Tolerant	s	p	Huang et al 2000	2000	https://lpsn.dsmz.de/species/salinivibrio-costicola	Salinivibrio	Vibrionaceae	Vibrionales	Gammaproteobacteria	Pseudomonadota	Pseudomonadati
Halospirulina tapeticola	B	3	3	3	20	Tolerant	s	p	Nübel et al 2000	2000	https://lpsn.dsmz.de/species/halospirulina-tapeticola	Halospirulina	Spirulinaceae	Spirulinales	Cyanophyceae	Cyanobacteriota	Bacillati
Vibrio aerogenes	B	4	4	1	7	Slight	s	p	Shieh et al 2000	2000	https://lpsn.dsmz.de/species/vibrio-aerogenes	Vibrio	Vibrionaceae	Vibrionales	Gammaproteobacteria	Pseudomonadota	Pseudomonadati
Salegentibacter salegens	B	5	5	0	20	Moderate	s	p	Sharee and Bowman 2000	2000	https://lpsn.dsmz.de/species/salegentibacter-salegens	Salegentibacter	Flavobacteriaceae	Flavobacteriales	Flavobacteriia	Bacteroidota	Pseudomonadati
Thermohalobacter berrensis	B	5	5	2	15	Moderate	s	p	Cayol et al. 2000	2000	https://lpsn.dsmz.de/species/thermohalobacter-berrensis	Thermohalobacter	Clostridiaceae	Eubacteriales	Clostridia	Bacillota	Bacillati
Methylarcula terricola	B	3	6	0.05	14	Moderate	s	p	Doronina et al 2000	2000	https://lpsn.dsmz.de/species/methylarcula-terricola	Methylarcula	Paracoccaceae	Rhodobacterales	Alphaproteobacteria	Pseudomonadota	Pseudomonadati
Pseudoalteromonas peptidolytica	B	6	6	1	10	No Class	s	p	Venkateswaran and Dohmoto 2000	2000	https://lpsn.dsmz.de/species/pseudoalteromonas-peptidolytica	Pseudoalteromonas	Pseudoalteromonadaceae	Alteromonadales	Gammaproteobacteria	Pseudomonadota	Pseudomonadati
Methylarcula marina	B	3	8	0.05	12	Moderate	s	p	Doronina et al 2000	2000	https://lpsn.dsmz.de/species/methylarcula-marina	Methylarcula	Paracoccaceae	Rhodobacterales	Alphaproteobacteria	Pseudomonadota	Pseudomonadati
Halanaerobium fermentans	B	10	10	5	25	Moderate	s	p	Kabayashi et al. 2000	2000	https://lpsn.dsmz.de/species/halanaerobium-fermentans	Halanaerobium	Halanaerobiaceae	Halanaerobiales	Clostridia	Bacillota	Bacillati
Nocardiopsis kunsanensis	B	10	10	3	20	Moderate	s	p	Chun et al. 2000 / Chen et al 2009	2000	https://lpsn.dsmz.de/species/nocardiopsis-kunsanensis	Nocardiopsis	Nocardiopsidaceae	Streptosporangiales	Actinomycetes	Actinomycetota	Bacillati
Orenia salinaria	B	5	10	2	25	No Class	s	p	Mouné et al 2000	2000	https://lpsn.dsmz.de/species/orenia-salinaria	Orenia	Halobacteroidaceae	Halanaerobiales	Clostridia	Bacillota	Bacillati
Alishewanella fetalis	B				8	Tolerant	s	p	Vogel et al 2000	2000	https://lpsn.dsmz.de/species/alishewanella-fetalis	Alishewanella	Chromatiaceae	Chromatiales	Gammaproteobacteria	Pseudomonadota	Pseudomonadati
Natrinema thermotolerans	A	3	3.5	2	4.3	Extreme	s	m	Montalvo-Rodríguez et al. 2000	2000	https://lpsn.dsmz.de/species/natrinema-thermotolerans	Natrinema	Natrialbaceae	Halobacteriales	Halobacteria	Methanobacteriota	Methanobacteriati
Natrinema versiforme	A	3.4	4.3	1.5	6.5	Extreme	s	m	Xin et al 2000	2000	https://lpsn.dsmz.de/species/natrinema-versiforme	Natrinema	Natrialbaceae	Halobacteriales	Halobacteria	Methanobacteriota	Methanobacteriati
Methanobacterium oryzae	A	5	5	0	25	Tolerant	s	g	Joulian et al 2000	2000	https://lpsn.dsmz.de/species/methanobacterium-oryzae	Methanobacterium	Methanobacteriaceae	Methanobacteriales	Methanobacteria	Methanobacteriota	Methanobacteriati
Halorhabdus utahensis	A	27	27	9	30	Extreme	s	p	Waino et al 2000	2000	https://lpsn.dsmz.de/species/halorhabdus-utahensis	Halorhabdus	Haloarculaceae	Halobacteriales	Halobacteria	Methanobacteriota	Methanobacteriati
Chromohalobacter canadensis	B	1.369	1.369	0.514	4.281	Moderate	s	m	Arahal et al. 2001	2001	https://lpsn.dsmz.de/species/chromohalobacter-canadensis	Chromohalobacter	Halomonadaceae	Oceanospirillales	Gammaproteobacteria	Pseudomonadota	Pseudomonadati
Chromohalobacter israelensis	B	1.369	1.369	0.599	3.425	Moderate	s	m	Arahal et al. 2001	2001	https://lpsn.dsmz.de/species/chromohalobacter-israelensis	Chromohalobacter	Halomonadaceae	Oceanospirillales	Gammaproteobacteria	Pseudomonadota	Pseudomonadati
Dethiosulfovibrio acidaminovorans	B	2	2	0.5	7	Slight	s	p	Surkov et al 2001	2001	https://lpsn.dsmz.de/species/dethiosulfovibrio-acidaminovorans	Dethiosulfovibrio	Dethiosulfovibrionaceae	Synergistales	Synergistia	Synergistota	Thermotogati
Dethiosulfovibrio marinus	B	2	2	0.5	5	Slight	s	p	Surkov et al 2001	2001	https://lpsn.dsmz.de/species/dethiosulfovibrio-marinus	Dethiosulfovibrio	Dethiosulfovibrionaceae	Synergistales	Synergistia	Synergistota	Thermotogati
Dethiosulfovibrio russensis	B	2	2	0.5	5	Slight	s	p	Surkov et al 2001	2001	https://lpsn.dsmz.de/species/dethiosulfovibrio-russensis	Dethiosulfovibrio	Dethiosulfovibrionaceae	Synergistales	Synergistia	Synergistota	Thermotogati
Hahella chejuensis	B	2	2	1	8	Slight	s	p	Lee et al 2001	2001	https://lpsn.dsmz.de/species/hahella-chejuensis	Hahella	Hahellaceae	Oceanospirillales	Gammaproteobacteria	Pseudomonadota	Pseudomonadati
Thiomicrospira sibirica	B	1	2	0	4	No Class	Na+	m	Sorokin et al 2001 / Boden et al 2017	2001	https://lpsn.dsmz.de/species/thiomicrospira-sibirica	Thiomicrospira	Piscirickettsiaceae	Beggiatoales	Gammaproteobacteria	Pseudomonadota	Pseudomonadati
Flagellimonas ruestringensis	B	3	3	0.5	9	Slight	s	p	Bruns et al 2001	2001	https://lpsn.dsmz.de/species/flagellimonas-ruestringensis	Flagellimonas	Flavobacteriaceae	Flavobacteriales	Flavobacteriia	Bacteroidota	Pseudomonadati
Alkalibacterium olivapovliticum	B	3	5	3	15	Tolerant	s	p	Ntougias and Russel 2001	2001	https://lpsn.dsmz.de/species/alkalibacterium-olivapovliticum	Alkalibacterium	Carnobacteriaceae	Lactobacillales	Bacilli	Bacillota	Bacillati
Alkalilimnicola halodurans	B	3	8	0	28	Moderate	s	p	Yakimov et al. 2001	2001	https://lpsn.dsmz.de/species/alkalilimnicola-halodurans	Alkalilimnicola	Ectothiorhodospiraceae	Chromatiales	Gammaproteobacteria	Pseudomonadota	Pseudomonadati
Halomonas maura	B	7.5	10	1	15	Moderate	Sais marinhos	p	Bouchotroch et al. 2001	2001	https://lpsn.dsmz.de/species/halomonas-maura	Halomonas	Halomonadaceae	Oceanospirillales	Gammaproteobacteria	Pseudomonadota	Pseudomonadati
Kushneria marisflavi	B	0.5	12	5	27	No Class	s	p	Yoon et al. 2001	2001	https://lpsn.dsmz.de/species/kushneria-marisflavi	Kushneria	Halomonadaceae	Oceanospirillales	Gammaproteobacteria	Pseudomonadota	Pseudomonadati
Jeotgalibacillus alimentarius	B	3	12	0	20	Moderate	s	p	Yoon et al. 2001	2001	https://lpsn.dsmz.de/species/jeotgalibacillus-alimentarius	Jeotgalibacillus	Caryophanaceae	Caryophanales	Bacilli	Bacillota	Bacillati
Filobacillus milosensis	B	8	14	2	23	No Class	s	p	Schlesner et al. 2001	2001	https://lpsn.dsmz.de/species/filobacillus-milosensis	Filobacillus	Bacillaceae	Caryophanales	Bacilli	Bacillota	Bacillati
Flavobacterium frigidarium	B			0	9	Tolerant	s	p	Humphry et al 2001	2001	https://lpsn.dsmz.de/species/flavobacterium-frigidarium	Flavobacterium	Flavobacteriaceae	Flavobacteriales	Flavobacteriia	Bacteroidota	Pseudomonadati
Thalassomonas viridans	B			2	4	No Class	s	p	Macián et al. 2001	2001	https://lpsn.dsmz.de/species/thalassomonas-viridans	Thalassomonas	Colwelliaceae	Alteromonadales	Gammaproteobacteria	Pseudomonadota	Pseudomonadati
Vibrio agarivorans	B				6	No Class	s	p	Mácian et al. 2001	2001	https://lpsn.dsmz.de/species/vibrio-agarivorans	Vibrio	Vibrionaceae	Vibrionales	Gammaproteobacteria	Pseudomonadota	Pseudomonadati
Natrialba aegyptia	A	2.5	3	1.6	5.137	Extreme	s	m	Hezayen et al. 2001	2001	https://lpsn.dsmz.de/species/natrialba-aegyptia	Natrialba	Natrialbaceae	Halobacteriales	Halobacteria	Methanobacteriota	Methanobacteriati
Natrialba taiwanensis	A	3.5	3.5	2	6.16	Extreme	s	m	Hezayen et al. 2001	2001	https://lpsn.dsmz.de/species/natrialba-taiwanensis	Natrialba	Natrialbaceae	Halobacteriales	Halobacteria	Methanobacteriota	Methanobacteriati
Natronobacterium nitratireducens	A	3.5	3.5	2.5	6	No Class	s	m	Xin et al 2001 / Hezayen et al 2002	2001	https://lpsn.dsmz.de/species/natronobacterium-nitratireducens	Natronobacterium	Natrialbaceae	Halobacteriales	Halobacteria	Methanobacteriota	Methanobacteriati
Natrialba asiatica	A	4	4	2	6.16	Extreme	s	m	Hezayen et al. 2001	2001	https://lpsn.dsmz.de/species/natrialba-asiatica	Natrialba	Natrialbaceae	Halobacteriales	Halobacteria	Methanobacteriota	Methanobacteriati
Natrialba chahannaoensis	A	15	15	10	30	No Class	s	p	Xu et al 2001	2001	https://lpsn.dsmz.de/species/natrialba-chahannaoensis	Natrialba	Natrialbaceae	Halobacteriales	Halobacteria	Methanobacteriota	Methanobacteriati
Natrialba hulunbeirensis	A	20	20	12	30	No Class	s	p	Xu et al 2001	2001	https://lpsn.dsmz.de/species/natrialba-hulunbeirensis	Natrialba	Natrialbaceae	Halobacteriales	Halobacteria	Methanobacteriota	Methanobacteriati
Citeromyces siamensis	E					Tolerant	s	p	Nagatsuka et al 2002	2002	-	Citeromyces	Saccharomycetaceae	Saccharomycetales	Saccharomycetes	Ascomycota	Fungi
Thioalkalispira microaerophila	B	0.5	0.5	0.2	1.4	Moderate	Na+	m	Sorokin et al. 2002	2002	https://lpsn.dsmz.de/species/thioalkalispira-microaerophila	Thioalkalispira	Thioalkalispiraceae	Chromatiales	Gammaproteobacteria	Pseudomonadota	Pseudomonadati
Pseudoalteromonas issachenkonii	B	1	3	0.5	15	No Class	s	p	Ivanova et al. 2002	2002	https://lpsn.dsmz.de/species/pseudoalteromonas-issachenkonii	Pseudoalteromonas	Pseudoalteromonadaceae	Alteromonadales	Gammaproteobacteria	Pseudomonadota	Pseudomonadati
Psychromonas kaikoae	B	3	3			No Class	s	p	Nogi et al 2002	2002	https://lpsn.dsmz.de/species/psychromonas-kaikoae	Psychromonas	Psychromonadaceae	Alteromonadales	Gammaproteobacteria	Pseudomonadota	Pseudomonadati
Enterovibrio calviensis	B	2.5	3.5	1.5	12	No Class	s	p	Denner et al. 2002 / Pascual et al 2009	2002	https://lpsn.dsmz.de/species/enterovibrio-calviensis	Enterovibrio	Vibrionaceae	Vibrionales	Gammaproteobacteria	Pseudomonadota	Pseudomonadati
Anaerophaga thermohalophila	B	2	6	2	12	No Class	s	p	Denger et al 2002	2002	https://lpsn.dsmz.de/species/anaerophaga-thermohalophila	Anaerophaga	Marinilabiliaceae	Bacteroidales	Bacteroidia	Bacteroidota	Pseudomonadati
Halomonas halocynthiae	B	3	6	0.5	15	Slight	s	p	Romanenko et al. 2002	2002	https://lpsn.dsmz.de/species/halomonas-halocynthiae	Halomonas	Halomonadaceae	Oceanospirillales	Gammaproteobacteria	Pseudomonadota	Pseudomonadati
Lentibacillus salicampi	B	4	8	2	23	Moderate	s	p	Yoon et al. 2002	2002	https://lpsn.dsmz.de/species/lentibacillus-salicampi	Lentibacillus	Bacillaceae	Caryophanales	Bacilli	Bacillota	Bacillati
Halomonas muralis	B	2.5	10	0	15	No Class	s	p	Heyrman et al 2002	2002	https://lpsn.dsmz.de/species/halomonas-muralis	Halomonas	Halomonadaceae	Oceanospirillales	Gammaproteobacteria	Pseudomonadota	Pseudomonadati
Nocardiopsis halotolerans	B	10	10	0	15	Tolerant	s	p	Al-Zarban et al 2002	2002	https://lpsn.dsmz.de/species/nocardiopsis-halotolerans	Nocardiopsis	Nocardiopsidaceae	Streptosporangiales	Actinomycetes	Actinomycetota	Bacillati
Saccharomonospora halophila	B	10	10	10	30	No Class	s	p	Al-Zahrban et al. 2002	2002	https://lpsn.dsmz.de/species/saccharomonospora-halophila	Saccharomonospora	Pseudonocardiaceae	Pseudonocardiales	Actinomycetes	Actinomycetota	Bacillati
Salinicoccus alkaliphilus	B	10	10	0	25	Moderate	s	p	Zhang et al. 2002	2002	https://lpsn.dsmz.de/species/salinicoccus-alkaliphilus	Salinicoccus	Staphylococcaceae	Caryophanales	Bacilli	Bacillota	Bacillati
Halomonas alimentaria	B	1	13	1	23	Moderate	s	p	Yoon et al. 2002	2002	https://lpsn.dsmz.de/species/halomonas-alimentaria	Halomonas	Halomonadaceae	Oceanospirillales	Gammaproteobacteria	Pseudomonadota	Pseudomonadati
Salinibacter ruber	B	20	30	15	38	Extreme	Total salts	p	Antón et al. 2002	2002	https://lpsn.dsmz.de/species/salinibacter-ruber	Salinibacter	Salinibacteraceae	Rhodothermales	Rhodothermia	Rhodothermota	Pseudomonadati
Leisingera methylohalidivorans	B	20	35	10	60	Moderate	s	g	Schaefer et al 2002	2002	https://lpsn.dsmz.de/species/leisingera-methylohalidivorans	Leisingera	Roseobacteraceae	Rhodobacterales	Alphaproteobacteria	Pseudomonadota	Pseudomonadati
Arthrobacter roseus	B			0	5.8	Tolerant	s	p	Reddy et al 2002	2002	https://lpsn.dsmz.de/species/arthrobacter-roseus	Arthrobacter	Micrococcaceae	Micrococcales	Actinomycetes	Actinomycetota	Bacillati
Psychrobacter marincola	B			0.5	15.5	Moderate	s	p	Romanenko et al. 2002	2002	https://lpsn.dsmz.de/species/psychrobacter-marincola	Psychrobacter	Moraxellaceae	Pseudomonadales	Gammaproteobacteria	Pseudomonadota	Pseudomonadati
Psychrobacter submarinus	B			0.5	15.5	Moderate	s	p	Romanenko et al. 2002	2002	https://lpsn.dsmz.de/species/psychrobacter-submarinus	Psychrobacter	Moraxellaceae	Pseudomonadales	Gammaproteobacteria	Pseudomonadota	Pseudomonadati
Psychromonas marina	B			3	5	No Class	s	p	Kawasaki et al. 2002	2002	https://lpsn.dsmz.de/species/psychromonas-marina	Psychromonas	Psychromonadaceae	Alteromonadales	Gammaproteobacteria	Pseudomonadota	Pseudomonadati
Thalassospira lucentensis	B			2	12	No Class	s	p	López-López et al 2002	2002	https://lpsn.dsmz.de/species/thalassospira-lucentensis	Thalassospira	Thalassospiraceae	Rhodospirillales	Alphaproteobacteria	Pseudomonadota	Pseudomonadati
Thioalkalivibrio thiocyanoxidans	B			0.3	4.3	Tolerant	Na+	m	Sorokin et al 2002	2002	https://lpsn.dsmz.de/species/thioalkalivibrio-thiocyanoxidans	Thioalkalivibrio	Ectothiorhodospiraceae	Chromatiales	Gammaproteobacteria	Pseudomonadota	Pseudomonadati
Natronobacterium haloterrestre	A	3.4	3.4	2.2	6.5	Extreme	s	m	Hezayen et al. 2002	2002	https://lpsn.dsmz.de/species/natronobacterium-haloterrestre	Natronobacterium	Natrialbaceae	Halobacteriales	Halobacteria	Methanobacteriota	Methanobacteriati
Halorubrum tebenquichense	A	5.2	5.2	2.5	5.2	Extreme	s	m	Lizama et al. 2002	2002	https://lpsn.dsmz.de/species/halorubrum-tebenquichense	Halorubrum	Haloferacaceae	Halobacteriales	Halobacteria	Methanobacteriota	Methanobacteriati
Halococcus dombrowskii	A	20	25	15	30	Extreme	s	p	Stan-Lotter et al. 2002	2002	https://lpsn.dsmz.de/species/halococcus-dombrowskii	Halococcus	Halococcaceae	Halobacteriales	Halobacteria	Methanobacteriota	Methanobacteriati
Haloferax volcanii	A	250	250	100	320	Extreme	s	g	Asker e Ohta 2002	2002	https://lpsn.dsmz.de/species/haloferax-volcanii	Haloferax	Haloferacaceae	Halobacteriales	Halobacteria	Methanobacteriota	Methanobacteriati
Thioalkalivibrio nitratireducens	B	0.4	0.5	0.2	1.5	Moderate	Na+	m	Sorokin et al. 2003	2003	https://lpsn.dsmz.de/species/thioalkalivibrio-nitratireducens	Thioalkalivibrio	Ectothiorhodospiraceae	Chromatiales	Gammaproteobacteria	Pseudomonadota	Pseudomonadati
Desulfonauticus submarinus	B	2	2	0	5	Slight	s	p	Audiffrin et al 2003	2003	https://lpsn.dsmz.de/species/desulfonauticus-submarinus	Desulfonauticus	Desulfohalobiaceae	Desulfovibrionales	Deltaproteobacteria	Pseudomonadota	Pseudomonadati
Vibrio ruber	B	2	2	1	10	No Class	s	p	Shieh et al 2003	2003	https://lpsn.dsmz.de/species/vibrio-ruber	Vibrio	Vibrionaceae	Vibrionales	Gammaproteobacteria	Pseudomonadota	Pseudomonadati
Maridesulfovibrio hydrothermalis	B	2.5	2.5	0	4	Slight	s	p	Alazard et al 2003 / Waite et al 2020	2003	https://lpsn.dsmz.de/species/maridesulfovibrio-hydrothermalis	Maridesulfovibrio	Desulfovibrionaceae	Desulfovibrionales	Deltaproteobacteria	Pseudomonadota	Pseudomonadati
Alkalispirochaeta americana	B	3	3	2	12	No Class	s	p	Hoover et al 2003 / Sravanthi et al 2016	2003	https://lpsn.dsmz.de/species/alkalispirochaeta-americana	Alkalispirochaeta	Spirochaetaceae	Spirochaetales	Spirochaetia	Spirochaetota	Pseudomonadati
Microbulbifer salipaludis	B	2	3		10	Moderate	s	p	Yoon et al. 2003	2003	https://lpsn.dsmz.de/species/microbulbifer-salipaludis	Microbulbifer	Microbulbiferaceae	Cellvibrionales	Gammaproteobacteria	Pseudomonadota	Pseudomonadati
Oceanisphaera litoralis	B	1	3	0.5	10	Moderate	s	p	Romanenko et al. 2003	2003	https://lpsn.dsmz.de/species/oceanisphaera-litoralis	Oceanisphaera	Aeromonadaceae	Aeromonadales	Gammaproteobacteria	Pseudomonadota	Pseudomonadati
Paramaledivibacter caminithermalis	B	3	3	1.5	6	Slight	Sais Marinhos	p	Brisbarre et al. 2003 / Li et al 2016	2003	https://lpsn.dsmz.de/species/paramaledivibacter-caminithermalis	Paramaledivibacter	Peptostreptococcaceae	Eubacteriales	Clostridia	Bacillota	Bacillati
Parvularcula bermudensis	B	3	3	0.75	25	Moderate	s	p	Cho and Giovannoni 2003	2003	https://lpsn.dsmz.de/species/parvularcula-bermudensis	Parvularcula	Parvularculaceae	Parvularculales	Alphaproteobacteria	Pseudomonadota	Pseudomonadati
Plesiocystis pacifica	B	2	3	1	4	Slight	s	p	Iizuka et al 2003	2003	https://lpsn.dsmz.de/species/plesiocystis-pacifica	Plesiocystis	Nannocystaceae	Myxococcales	Deltaproteobacteria	Pseudomonadota	Pseudomonadati
Psychrobacter jeotgali	B	2	3	0	10	Moderate	s	p	Yoon et al. 2003	2003	https://lpsn.dsmz.de/species/psychrobacter-jeotgali	Psychrobacter	Moraxellaceae	Pseudomonadales	Gammaproteobacteria	Pseudomonadota	Pseudomonadati
Shewanella marinintestina	B	2	3	1	5	No Class	s	p	Satomi et al. 2003	2003	https://lpsn.dsmz.de/species/shewanella-marinintestina	Shewanella	Shewanellaceae	Alteromonadales	Gammaproteobacteria	Pseudomonadota	Pseudomonadati
Shewanella sairae	B	2	3	1	5	No Class	s	p	Satomi et al. 2003	2003	https://lpsn.dsmz.de/species/shewanella-sairae	Shewanella	Shewanellaceae	Alteromonadales	Gammaproteobacteria	Pseudomonadota	Pseudomonadati
Shewanella schlegeliana	B	2	3	1	5	No Class	s	p	Satomi et al. 2003	2003	https://lpsn.dsmz.de/species/shewanella-schlegeliana	Shewanella	Shewanellaceae	Alteromonadales	Gammaproteobacteria	Pseudomonadota	Pseudomonadati
Marinilactibacillus psychrotolerans	B	2	3.75	0	20.5	No Class	s	p	Ishikawa et al.2003	2003	https://lpsn.dsmz.de/species/marinilactibacillus-psychrotolerans	Marinilactibacillus	Carnobacteriaceae	Lactobacillales	Bacilli	Bacillota	Bacillati
Methylophaga alcalica	B	3	4	0.05	10	Moderate	s	p	Doronina et al. 2003	2003	https://lpsn.dsmz.de/species/methylophaga-alcalica	Methylophaga	Piscirickettsiaceae	Beggiatoales	Gammaproteobacteria	Pseudomonadota	Pseudomonadati
Zooshikella ganghwensis	B	3	4	1	7	No Class	s	p	Yi et al 2003	2003	https://lpsn.dsmz.de/species/zooshikella-ganghwensis	Zooshikella	Zooshikellaceae	Oceanospirillales	Gammaproteobacteria	Pseudomonadota	Pseudomonadati
Alteromonas marina	B	2	5		15	Moderate	s	p	Yoon et al 2003	2003	https://lpsn.dsmz.de/species/alteromonas-marina	Alteromonas	Alteromonadaceae	Alteromonadales	Gammaproteobacteria	Pseudomonadota	Pseudomonadati
Jeotgalicoccus halotolerans	B	2	5	0	20	Moderate	s	p	Yoon et al. 2003	2003	https://lpsn.dsmz.de/species/jeotgalicoccus-halotolerans	Jeotgalicoccus	Staphylococcaceae	Caryophanales	Bacilli	Bacillota	Bacillati
Jeotgalicoccus psychrophilus	B	2	5		14	Moderate	s	p	Yoon et al. 2003	2003	https://lpsn.dsmz.de/species/jeotgalicoccus-psychrophilus	Jeotgalicoccus	Staphylococcaceae	Caryophanales	Bacilli	Bacillota	Bacillati
Paraglaciecola mesophila	B	2	5	1	8	Slight	s	m	Romanenko et al. 2003	2003	https://lpsn.dsmz.de/species/paraglaciecola-mesophila	Paraglaciecola	Alteromonadaceae	Alteromonadales	Gammaproteobacteria	Pseudomonadota	Pseudomonadati
Qipengyuania flava	B	2	5		14	Slight	s	p	Yoon et al. 2003 / Lee and Kim 2020	2003	https://lpsn.dsmz.de/species/qipengyuania-flava	Qipengyuania	Erythrobacteraceae	Sphingomonadales	Alphaproteobacteria	Pseudomonadota	Pseudomonadati
Rossellomorea aquimaris	B	2	5	0	18	Moderate	s	p	Yoon et al 2003	2003	https://lpsn.dsmz.de/species/rossellomorea-aquimaris	Rossellomorea	Bacillaceae	Caryophanales	Bacilli	Bacillota	Bacillati
Rossellomorea marisflavi	B	2	5	0	16	Moderate	s	p	Yoon et al 2003	2003	https://lpsn.dsmz.de/species/rossellomorea-marisflavi	Rossellomorea	Bacillaceae	Caryophanales	Bacilli	Bacillota	Bacillati
Marinobacter litoralis	B	2	7	0.5	18	Moderate	s	p	Yoon et al. 2003	2003	https://lpsn.dsmz.de/species/marinobacter-litoralis	Marinobacter	Alteromonadaceae	Alteromonadales	Gammaproteobacteria	Pseudomonadota	Pseudomonadati
Marinobacter lipolyticus	B	7.5	7.5	1	15	Moderate	s	p	Martín et al. 2003	2003	https://lpsn.dsmz.de/species/marinobacter-lipolyticus	Marinobacter	Alteromonadaceae	Alteromonadales	Gammaproteobacteria	Pseudomonadota	Pseudomonadati
Halobacillus karajensis	B	10	10	1	24	Moderate	s	p	Amoozegar et al. 2003	2003	https://lpsn.dsmz.de/species/halobacillus-karajensis	Halobacillus	Bacillaceae	Caryophanales	Bacilli	Bacillota	Bacillati
Halobacillus salinus	B	2	10	0	23	No Class	s	p	Yoon et al. 2003	2003	https://lpsn.dsmz.de/species/halobacillus-salinus	Halobacillus	Bacillaceae	Caryophanales	Bacilli	Bacillota	Bacillati
Idiomarina loihiensis	B	7.5	10	0.5	20	No Class	s	p	Donachie et al. 2003	2003	https://lpsn.dsmz.de/species/idiomarina-loihiensis	Idiomarina	Idiomarinaceae	Alteromonadales	Gammaproteobacteria	Pseudomonadota	Pseudomonadati
Nocardiopsis xinjiangensis	B	10	10			No Class	s	p	Li et al. 2003	2003	https://lpsn.dsmz.de/species/nocardiopsis-xinjiangensis	Nocardiopsis	Nocardiopsidaceae	Streptosporangiales	Actinomycetes	Actinomycetota	Bacillati
Halorhodospira neutriphila	B	9	12	6	30	Extreme	s	p	Hirschler-Réa et al. 2003	2003	https://lpsn.dsmz.de/species/halorhodospira-neutriphila	Halorhodospira	Halorhodospiraceae	Chromatiales	Gammaproteobacteria	Pseudomonadota	Pseudomonadati
Prauserella alba	B	10	15	2	25	Moderate	s	p	Li et al. 2003	2003	https://lpsn.dsmz.de/species/prauserella-alba	Prauserella	Pseudonocardiaceae	Pseudonocardiales	Actinomycetes	Actinomycetota	Bacillati
Prauserella halophila	B	10	15	5	25	Moderate	s	p	Li et al. 2003	2003	https://lpsn.dsmz.de/species/prauserella-halophila	Prauserella	Pseudonocardiaceae	Pseudonocardiales	Actinomycetes	Actinomycetota	Bacillati
Streptomonospora alba	B	10	15	5	25	No Class	s	p	Li et al. 2003	2003	https://lpsn.dsmz.de/species/streptomonospora-alba	Streptomonospora	Nocardiopsidaceae	Streptosporangiales	Actinomycetes	Actinomycetota	Bacillati
Alcanivorax venustensis	B			0	15	No Class	s	p	Fernandéz-Martinéz et al. 2003	2003	https://lpsn.dsmz.de/species/alcanivorax-venustensis	Alcanivorax	Alcanivoracaceae	Oceanospirillales	Gammaproteobacteria	Pseudomonadota	Pseudomonadati
Aurantimonas coralicida	B					No Class	Marine salts	p	Denner et al. 2003	2003	https://lpsn.dsmz.de/species/aurantimonas-coralicida	Aurantimonas	Aurantimonadaceae	Hyphomicrobiales	Alphaproteobacteria	Pseudomonadota	Pseudomonadati
Flavobacterium gelidilacus	B			0	5	Tolerant	s	p	Trappen et al 2003	2003	https://lpsn.dsmz.de/species/flavobacterium-gelidilacus	Flavobacterium	Flavobacteriaceae	Flavobacteriales	Flavobacteriia	Bacteroidota	Pseudomonadati
Halalkalibacter krulwichiae	B			0	14	Tolerant	s	p	Yumoto et al 2003	2003	https://lpsn.dsmz.de/species/halalkalibacter-krulwichiae	Halalkalibacter	Bacillaceae	Caryophanales	Bacilli	Bacillota	Bacillati
Marinobacter excellens	B			1	15	No Class	s	p	Gorshkova et al. 2003	2003	https://lpsn.dsmz.de/species/marinobacter-excellens	Marinobacter	Alteromonadaceae	Alteromonadales	Gammaproteobacteria	Pseudomonadota	Pseudomonadati
Marinomonas primoryensis	B			1	6	No Class	s	m	Romanenko et al. 2003	2003	https://lpsn.dsmz.de/species/marinomonas-primoryensis	Marinomonas	Oceanospirillaceae	Oceanospirillales	Gammaproteobacteria	Pseudomonadota	Pseudomonadati
Mesonia algae	B			1	15	Moderate	s	p	Nedashkovskaya et al. 2003	2003	https://lpsn.dsmz.de/species/mesonia-algae	Mesonia	Flavobacteriaceae	Flavobacteriales	Flavobacteriia	Bacteroidota	Pseudomonadati
Psychrobacter fozii	B			1	10	Moderate	s	p	Bozal et al 2003	2003	https://lpsn.dsmz.de/species/psychrobacter-fozii	Psychrobacter	Moraxellaceae	Pseudomonadales	Gammaproteobacteria	Pseudomonadota	Pseudomonadati
Psychrobacter luti	B			0	8	Moderate	s	p	Bozal et al 2003	2003	https://lpsn.dsmz.de/species/psychrobacter-luti	Psychrobacter	Moraxellaceae	Pseudomonadales	Gammaproteobacteria	Pseudomonadota	Pseudomonadati
Psychromonas profunda	B					Moderate	s	p	Xu et al 2003	2003	https://lpsn.dsmz.de/species/psychromonas-profunda	Psychromonas	Psychromonadaceae	Alteromonadales	Gammaproteobacteria	Pseudomonadota	Pseudomonadati
Rheinheimera pacifica	B			0	8	Tolerant	s	p	Romanenko et al 2003	2003	https://lpsn.dsmz.de/species/rheinheimera-pacifica	Rheinheimera	Chromatiaceae	Chromatiales	Gammaproteobacteria	Pseudomonadota	Pseudomonadati
Psychroflexus tropicus	B	7.5	10	1	20	Moderate	s	p	Donachie et al. 2004	2004	https://lpsn.dsmz.de/species/psychroflexus-tropicus	Psychroflexus	Flavobacteriaceae	Flavobacteriales	Flavobacteriia	Bacteroidota	Pseudomonadati
Rossellomorea vietnamensis	B	1	1	0	15	Tolerant	s	p	Noguchi et al 2004 / Gupta et al 2020	2004	https://lpsn.dsmz.de/species/rossellomorea-vietnamensis	Rossellomorea	Bacillaceae	Caryophanales	Bacilli	Bacillota	Bacillati
Halomonas ventosae	B	1.38	1.38			Moderate	s	m	Martínez-Cánovas et al. 2004	2004	https://lpsn.dsmz.de/species/halomonas-ventosae	Halomonas	Halomonadaceae	Oceanospirillales	Gammaproteobacteria	Pseudomonadota	Pseudomonadati
Erythrobacter donghaensis	B	2	2	0	7	Slight	s	p	Yoon et al. 2004	2004	https://lpsn.dsmz.de/species/erythrobacter-donghaensis	Erythrobacter	Erythrobacteraceae	Sphingomonadales	Alphaproteobacteria	Pseudomonadota	Pseudomonadati
Shewanella gaetbuli	B	2	2		8	Slight	s	p	Yoon et al. 2004	2004	https://lpsn.dsmz.de/species/shewanella-gaetbuli	Shewanella	Shewanellaceae	Alteromonadales	Gammaproteobacteria	Pseudomonadota	Pseudomonadati
Oleidesulfovibrio alaskensis	B	2.5	2.5	0	10	Moderate	s	p	Feio et al. 2004	2004	https://lpsn.dsmz.de/species/oleidesulfovibrio-alaskensis	Oleidesulfovibrio	Desulfovibrionaceae	Desulfovibrionales	Deltaproteobacteria	Pseudomonadota	Pseudomonadati
Aestuariibacter halophilus	B	2	3			No Class	Sea salts	p	Yi et al. 2004	2004	https://lpsn.dsmz.de/species/aestuariibacter-halophilus	Aestuariibacter	Alteromonadaceae	Alteromonadales	Gammaproteobacteria	Pseudomonadota	Pseudomonadati
Halomonas neptunia	B	2	3	0.5	27	No Class	Total salts	p	Kaye et al. 2004	2004	https://lpsn.dsmz.de/species/halomonas-neptunia	Halomonas	Halomonadaceae	Oceanospirillales	Gammaproteobacteria	Pseudomonadota	Pseudomonadati
Halomonas sulfidaeris	B	2	3	0.5	24	No Class	Total salts	p	Kaye et al. 2004	2004	https://lpsn.dsmz.de/species/halomonas-sulfidaeris	Halomonas	Halomonadaceae	Oceanospirillales	Gammaproteobacteria	Pseudomonadota	Pseudomonadati
Jeotgalibacillus campisalis	B	2	3	0.5	15	Moderate	s	p	Yoon et al. 2004 / Yoon et al 2010	2004	https://lpsn.dsmz.de/species/jeotgalibacillus-campisalis	Jeotgalibacillus	Caryophanaceae	Caryophanales	Bacilli	Bacillota	Bacillati
Kordia algicida	B	3	3	1	5	Moderate	s	p	Sohn et al. 2004	2004	https://lpsn.dsmz.de/species/kordia-algicida	Kordia	Flavobacteriaceae	Flavobacteriales	Flavobacteriia	Bacteroidota	Pseudomonadati
Marinospirillum insulare	B	2	3	0.5	10	No Class	s	p	Satomi et al. 2004	2004	https://lpsn.dsmz.de/species/marinospirillum-insulare	Marinospirillum	Oceanospirillaceae	Oceanospirillales	Gammaproteobacteria	Pseudomonadota	Pseudomonadati
Pseudovibrio denitrificans	B	3	3	2	6	No Class	s	p	Shieh et al 2004	2004	https://lpsn.dsmz.de/species/pseudovibrio-denitrificans	Pseudovibrio	Stappiaceae	Hyphomicrobiales	Alphaproteobacteria	Pseudomonadota	Pseudomonadati
Qipengyuania aquimaris	B	2	3		10	Slight	s	p	Yoon et al. 2004	2004	https://lpsn.dsmz.de/species/qipengyuania-aquimaris	Qipengyuania	Erythrobacteraceae	Sphingomonadales	Alphaproteobacteria	Pseudomonadota	Pseudomonadati
Serinicoccus marinus	B	2	3	0	14	Moderate	s	p	Yi et al. 2004	2004	https://lpsn.dsmz.de/species/serinicoccus-marinus	Serinicoccus	Ornithinimicrobiaceae	Micrococcales	Actinomycetes	Actinomycetota	Bacillati
Shewanella aquimarina	B	2	3	0	9	Slight	s	p	Yoon et al. 2004	2004	https://lpsn.dsmz.de/species/shewanella-aquimarina	Shewanella	Shewanellaceae	Alteromonadales	Gammaproteobacteria	Pseudomonadota	Pseudomonadati
Shewanella marisflavi	B	2	3	0	9	Slight	s	p	Yoon et al. 2004	2004	https://lpsn.dsmz.de/species/shewanella-marisflavi	Shewanella	Shewanellaceae	Alteromonadales	Gammaproteobacteria	Pseudomonadota	Pseudomonadati
Halomonas aquamarina	B	4	4	0.5	24	Moderate	Total salts	p	Kaye et al. 2004	2004	https://lpsn.dsmz.de/species/halomonas-aquamarina	Halomonas	Halomonadaceae	Oceanospirillales	Gammaproteobacteria	Pseudomonadota	Pseudomonadati
Microbulbifer maritimus	B	2	4	0.5	10	Slight	s	p	Yoon et al. 2004	2004	https://lpsn.dsmz.de/species/microbulbifer-maritimus	Microbulbifer	Microbulbiferaceae	Cellvibrionales	Gammaproteobacteria	Pseudomonadota	Pseudomonadati
Thalassotalea ganghwensis	B	2	4	1	8	No Class	Sea salts	p	Yi et al. 2004	2004	https://lpsn.dsmz.de/species/thalassotalea-ganghwensis	Thalassotalea	Colwelliaceae	Alteromonadales	Gammaproteobacteria	Pseudomonadota	Pseudomonadati
Algoriphagus halophilus	B	5	5	1	10	Slight	s	p	Yi and Chun 2004 / Nedashkovskaya et al 2004	2004	https://lpsn.dsmz.de/species/algoriphagus-halophilus	Algoriphagus	Cyclobacteriaceae	Cytophagales	Cytophagia	Bacteroidota	Pseudomonadati
Alteromonas litorea	B	2	5	0.5	14	Slight	s	p	Yoon et al. 2004	2004	https://lpsn.dsmz.de/species/alteromonas-litorea	Alteromonas	Alteromonadaceae	Alteromonadales	Gammaproteobacteria	Pseudomonadota	Pseudomonadati
Halomonas boliviensis	B	5	5	0	25	Moderate	s	p	Quillaguamán et al. 2004	2004	https://lpsn.dsmz.de/species/halomonas-boliviensis	Halomonas	Halomonadaceae	Oceanospirillales	Gammaproteobacteria	Pseudomonadota	Pseudomonadati
Idiomarina fontislapidosi	B	3	5	0.5	25	Moderate	s	p	Martínez-Cánovas et al. 2004	2004	https://lpsn.dsmz.de/species/idiomarina-fontislapidosi	Idiomarina	Idiomarinaceae	Alteromonadales	Gammaproteobacteria	Pseudomonadota	Pseudomonadati
Idiomarina ramblicola	B	3	5	0.5	15	Moderate	s	p	Martínez-Cánovas et al. 2004	2004	https://lpsn.dsmz.de/species/idiomarina-ramblicola	Idiomarina	Idiomarinaceae	Alteromonadales	Gammaproteobacteria	Pseudomonadota	Pseudomonadati
Novosphingobium pentaromativorans	B	2	5	1	6	Moderate	s	p	Sohn et al. 2004	2004	https://lpsn.dsmz.de/species/novosphingobium-pentaromativorans	Novosphingobium	Erythrobacteraceae	Sphingomonadales	Alphaproteobacteria	Pseudomonadota	Pseudomonadati
Pseudalkalibacillus hwajinpoensis	B	2	5		19	Slight	s	p	Yoon et al. 2004	2004	https://lpsn.dsmz.de/species/pseudalkalibacillus-hwajinpoensis	Pseudalkalibacillus	Bacillaceae	Caryophanales	Bacilli	Bacillota	Bacillati
Aestuariibacter salexigens	B	2	6			No Class	Sea salts	p	Yi et al. 2004	2004	https://lpsn.dsmz.de/species/aestuariibacter-salexigens	Aestuariibacter	Alteromonadaceae	Alteromonadales	Gammaproteobacteria	Pseudomonadota	Pseudomonadati
Marinobacter daepoensis	B	2	6	0	18	Slight	s	p	Yoon et al. 2004	2004	https://lpsn.dsmz.de/species/marinobacter-daepoensis	Marinobacter	Alteromonadaceae	Alteromonadales	Gammaproteobacteria	Pseudomonadota	Pseudomonadati
Marinobacter flavimaris	B	2	6	0	20	Slight	s	p	Yoon et al. 2004	2004	https://lpsn.dsmz.de/species/marinobacter-flavimaris	Marinobacter	Alteromonadaceae	Alteromonadales	Gammaproteobacteria	Pseudomonadota	Pseudomonadati
Paracoccus haeundaensis	B	1	6	0	8	No Class	s	p	Lee et al. 2004	2004	https://lpsn.dsmz.de/species/paracoccus-haeundaensis	Paracoccus	Paracoccaceae	Rhodobacterales	Alphaproteobacteria	Pseudomonadota	Pseudomonadati
Halomonas venusta	B	4	7	0.5	22	Moderate	Total salts	p	Kaye et al. 2004	2004	https://lpsn.dsmz.de/species/halomonas-venusta	Halomonas	Halomonadaceae	Oceanospirillales	Gammaproteobacteria	Pseudomonadota	Pseudomonadati
Chromohalobacter sarecensis	B	8	8	0	25	Moderate	s	p	Quillaguamán et al. 2004	2004	https://lpsn.dsmz.de/species/chromohalobacter-sarecensis	Chromohalobacter	Halomonadaceae	Oceanospirillales	Gammaproteobacteria	Pseudomonadota	Pseudomonadati
Halomonas organivorans	B	7.5	10	1.5	30	Moderate	s	p	García et al. 2004	2004	https://lpsn.dsmz.de/species/halomonas-organivorans	Halomonas	Halomonadaceae	Oceanospirillales	Gammaproteobacteria	Pseudomonadota	Pseudomonadati
Nocardiopsis salina	B	10	10	3	20	Moderate	s	p	Li et al. 2004	2004	https://lpsn.dsmz.de/species/nocardiopsis-salina	Nocardiopsis	Nocardiopsidaceae	Streptosporangiales	Actinomycetes	Actinomycetota	Bacillati
Salipiger mucosus	B	9	10	0.5	20	Moderate	s	p	Martínez-Cánovas et al. 2004	2004	https://lpsn.dsmz.de/species/salipiger-mucosus	Salipiger	Roseobacteraceae	Rhodobacterales	Alphaproteobacteria	Pseudomonadota	Pseudomonadati
Halomonas koreensis	B	1	12	1	20	Moderate	s	p	Lim et al. 2004	2004	https://lpsn.dsmz.de/species/halomonas-koreensis	Halomonas	Halomonadaceae	Oceanospirillales	Gammaproteobacteria	Pseudomonadota	Pseudomonadati
Petrotoga mexicana	B	30	30	10	200	Slight	s	g	Miranda-Tello et al 2004	2004	https://lpsn.dsmz.de/species/petrotoga-mexicana	Petrotoga	Petrotogaceae	Petrotogales	Thermotogae	Thermotogota	Thermotogati
Maridesulfovibrio bastinii	B	40	40	10	120	Moderate	s	g	Magot et al. 2004 / Waite et al 2020	2004	https://lpsn.dsmz.de/species/maridesulfovibrio-bastinii	Maridesulfovibrio	Desulfovibrionaceae	Desulfovibrionales	Deltaproteobacteria	Pseudomonadota	Pseudomonadati
Paucidesulfovibrio gracilis	B	50	60	20	120	Moderate	s	g	Magot et al. 2004 / Waite et al 2020	2004	https://lpsn.dsmz.de/species/paucidesulfovibrio-gracilis	Paucidesulfovibrio	Desulfovibrionaceae	Desulfovibrionales	Deltaproteobacteria	Pseudomonadota	Pseudomonadati
Alteromonas stellipolaris	B			1	10	Moderate	s	p	Van Trappen et al. 2004	2004	https://lpsn.dsmz.de/species/alteromonas-stellipolaris	Alteromonas	Alteromonadaceae	Alteromonadales	Gammaproteobacteria	Pseudomonadota	Pseudomonadati
Gillisia limnaea	B			0	5	Tolerant	s	p	Van Trappen et al 2004	2004	https://lpsn.dsmz.de/species/gillisia-limnaea	Gillisia	Flavobacteriaceae	Flavobacteriales	Flavobacteriia	Bacteroidota	Pseudomonadati
Kocuria marina	B			0	15	Tolerant	s	p	Kim et al 2004	2004	https://lpsn.dsmz.de/species/kocuria-marina	Kocuria	Micrococcaceae	Micrococcales	Actinomycetes	Actinomycetota	Bacillati
Loktanella fryxellensis	B			0	5	Tolerant	s	p	Van Trappen et al 2004	2004	https://lpsn.dsmz.de/species/loktanella-fryxellensis	Loktanella	Roseobacteraceae	Rhodobacterales	Alphaproteobacteria	Pseudomonadota	Pseudomonadati
Loktanella salsilacus	B			0	10	Tolerant	s	p	Van Trappen et al 2004	2004	https://lpsn.dsmz.de/species/loktanella-salsilacus	Loktanella	Roseobacteraceae	Rhodobacterales	Alphaproteobacteria	Pseudomonadota	Pseudomonadati
Paraglaciecola polaris	B			0	10	Moderate	s	p	Van Trappen et al. 2004	2004	https://lpsn.dsmz.de/species/paraglaciecola-polaris	Paraglaciecola	Alteromonadaceae	Alteromonadales	Gammaproteobacteria	Pseudomonadota	Pseudomonadati
Pseudoalteromonas aliena	B			0.5	6	Slight	s	p	Ivanova et al. 2004	2004	https://lpsn.dsmz.de/species/pseudoalteromonas-aliena	Pseudoalteromonas	Pseudoalteromonadaceae	Alteromonadales	Gammaproteobacteria	Pseudomonadota	Pseudomonadati
Rubrobacter taiwanensis	B			0	5	Tolerant	s	p	Chen et al 2004	2004	https://lpsn.dsmz.de/species/rubrobacter-taiwanensis	Rubrobacter	Rubrobacteraceae	Rubrobacterales	Rubrobacteria	Actinomycetota	Bacillati
Yaniella halotolerans	B			0	25	Tolerant	s	p	Li et al 2004 / Li et al 2008	2004	https://lpsn.dsmz.de/species/yaniella-halotolerans	Yaniella	Micrococcaceae	Micrococcales	Actinomycetes	Actinomycetota	Bacillati
Yoonia vestfoldensis	B			0	10	Tolerant	s	p	Ven Trappen et al 2004	2004	https://lpsn.dsmz.de/species/yoonia-vestfoldensis	Yoonia	Roseobacteraceae	Rhodobacterales	Alphaproteobacteria	Pseudomonadota	Pseudomonadati
Halomonas anticariensis	B	7.5	7.5	0.5	15	Moderate	s	p	Martínez-Cánovas et al. 2004	2004	https://lpsn.dsmz.de/species/halomonas-anticariensis	Halomonas	Halomonadaceae	Oceanospirillales	Gammaproteobacteria	Pseudomonadota	Pseudomonadati
Methanobacterium aarhusense	A	0.1	0.9	0.05	1	Moderate	s	m	Shlimon et al. 2004	2004	https://lpsn.dsmz.de/species/methanobacterium-aarhusense	Methanobacterium	Methanobacteriaceae	Methanobacteriales	Methanobacteria	Methanobacteriota	Methanobacteriati
Methanocalculus chunghsingensis	A	1	1	0	12	Tolerant	s	p	Lai et al 2004	2004	https://lpsn.dsmz.de/species/methanocalculus-chunghsingensis	Methanocalculus	Methanocalculaceae	Methanomicrobiales	Methanomicrobia	Methanobacteriota	Methanobacteriati
Haloferax sulfurifontis	A	2.1	2.6	1	5.2	Extreme	s	m	Elshahed et al. 2004	2004	https://lpsn.dsmz.de/species/haloferax-sulfurifontis	Haloferax	Haloferacaceae	Halobacteriales	Halobacteria	Methanobacteriota	Methanobacteriati
Halorubrum tibetense	A	3	3.4	1.7	5.2	No Class	s	m	Fan et al 2004	2004	https://lpsn.dsmz.de/species/halorubrum-tibetense	Halorubrum	Haloferacaceae	Halobacteriales	Halobacteria	Methanobacteriota	Methanobacteriati
Halorubrum xinjiangense	A	3.1	3.4	2	5.2	No Class	s	m	Feng et al. 2004	2004	https://lpsn.dsmz.de/species/halorubrum-xinjiangense	Halorubrum	Haloferacaceae	Halobacteriales	Halobacteria	Methanobacteriota	Methanobacteriati
Halorubrum distributum	A	20	25	12	30	Extreme	s	p	Ventosa et al. 2004	2004	https://lpsn.dsmz.de/species/halorubrum-distributum	Halorubrum	Haloferacaceae	Halobacteriales	Halobacteria	Methanobacteriota	Methanobacteriati
Alteromonas addita	B			1	10	Slight	s	p	Ivanova et al. 2005	2005	https://lpsn.dsmz.de/species/alteromonas-addita	Alteromonas	Alteromonadaceae	Alteromonadales	Gammaproteobacteria	Pseudomonadota	Pseudomonadati
Thiovirga sulfuroxydans	B	0.03	0.03	0	0.18	Tolerant	s	m	Ito et al 2005	2005	https://lpsn.dsmz.de/species/thiovirga-sulfuroxydans	Thiovirga	Halothiobacillaceae	Chromatiales	Gammaproteobacteria	Pseudomonadota	Pseudomonadati
Lacinutrix copepodicola	B	0.3	0.4	0.1	2	No Class	s	m	Bowman et al. 2005	2005	https://lpsn.dsmz.de/species/lacinutrix-copepodicola	Lacinutrix	Flavobacteriaceae	Flavobacteriales	Flavobacteriia	Bacteroidota	Pseudomonadati
Subsaxibacter broadyi	B	0.3	0.4	0.1	1.25	No Class	s	m	Bowman et al. 2005	2005	https://lpsn.dsmz.de/species/subsaxibacter-broadyi	Subsaxibacter	Flavobacteriaceae	Flavobacteriales	Flavobacteriia	Bacteroidota	Pseudomonadati
Subsaximicrobium saxinquilinus	B	0.3	0.4	0.1	2	No Class	s	m	Bowman et al. 2005	2005	https://lpsn.dsmz.de/species/subsaximicrobium-saxinquilinus	Subsaximicrobium	Flavobacteriaceae	Flavobacteriales	Flavobacteriia	Bacteroidota	Pseudomonadati
Subsaximicrobium wynnwilliamsii	B	0.3	0.4	0.25	2	No Class	s	m	Bowman et al. 2005	2005	https://lpsn.dsmz.de/species/subsaximicrobium-wynnwilliamsii	Subsaximicrobium	Flavobacteriaceae	Flavobacteriales	Flavobacteriia	Bacteroidota	Pseudomonadati
Nitrincola lacisaponensis	B	0.8	0.8	0.2	1.3	Tolerant	s	m	Dimitriu et al 2005	2005	https://lpsn.dsmz.de/species/nitrincola-lacisaponensis	Nitrincola	Oceanospirillaceae	Oceanospirillales	Gammaproteobacteria	Pseudomonadota	Pseudomonadati
Metabacillus indicus	B	0	1	0	12	Tolerant	s	p	Yoon et al 2005 / Patel and Gupta 2020	2005	https://lpsn.dsmz.de/species/metabacillus-indicus	Metabacillus	Bacillaceae	Caryophanales	Bacilli	Bacillota	Bacillati
Methylothermus thermalis	B	0.5	1	0	3	Tolerant	s	p	Tsubota et al 2005	2005	https://lpsn.dsmz.de/species/methylothermus-thermalis	Methylothermus	Incertae sedis	Incertae sedis	Incertae sedis	Incertae sedis	Incertae sedis
Methylohalobius crimeensis	B	1	1.5	0.2	2.5	Moderate	s	m	Heyer et al 2005	2005	https://lpsn.dsmz.de/species/methylohalobius-crimeensis	Methylohalobius	Methylothermaceae	Methylococcales	Gammaproteobacteria	Pseudomonadota	Pseudomonadati
Photobacterium frigidiphilum	B	1.5	1.5	1	3	Slight	s	p	Seo et al. 2005	2005	https://lpsn.dsmz.de/species/photobacterium-frigidiphilum	Photobacterium	Vibrionaceae	Vibrionales	Gammaproteobacteria	Pseudomonadota	Pseudomonadati
Algoriphagus locisalis	B	2	2	0	9	Slight	s	p	Yoon et al 2005	2005	https://lpsn.dsmz.de/species/algoriphagus-locisalis	Algoriphagus	Cyclobacteriaceae	Cytophagales	Cytophagia	Bacteroidota	Pseudomonadati
Algoriphagus yeomjeoni	B	2	2		9	Slight	s	p	Yoon et al 2005	2005	https://lpsn.dsmz.de/species/algoriphagus-yeomjeoni	Algoriphagus	Cyclobacteriaceae	Cytophagales	Cytophagia	Bacteroidota	Pseudomonadati
Dokdonia donghaensis	B	2	2	0.5	7	Slight	s	p	Yoon et al 2005	2005	https://lpsn.dsmz.de/species/dokdonia-donghaensis	Dokdonia	Flavobacteriaceae	Flavobacteriales	Flavobacteriia	Bacteroidota	Pseudomonadati
Exiguobacterium aestuarii	B	2	2	0	19	Slight	s	p	Kim et al 2005	2005	https://lpsn.dsmz.de/species/exiguobacterium-aestuarii	Exiguobacterium	Bacillaceae	Caryophanales	Bacilli	Bacillota	Bacillati
Exiguobacterium marinum	B	2	2	0	17	Slight	s	p	Kim et al 2005	2005	https://lpsn.dsmz.de/species/exiguobacterium-marinum	Exiguobacterium	Bacillaceae	Caryophanales	Bacilli	Bacillota	Bacillati
Flagellimonas flavescens	B	2	2		9	Slight	s	p	Yoon et al. 2005	2005	https://lpsn.dsmz.de/species/flagellimonas-flavescens	Flagellimonas	Flavobacteriaceae	Flavobacteriales	Flavobacteriia	Bacteroidota	Pseudomonadati
Flagellimonas marinaquae	B	2	2		10	Slight	s	p	Yoon et al. 2005	2005	https://lpsn.dsmz.de/species/flagellimonas-marinaquae	Flagellimonas	Flavobacteriaceae	Flavobacteriales	Flavobacteriia	Bacteroidota	Pseudomonadati
Martelella mediterranea	B	0	2	0	5	Tolerant	s	p	Rivas et al 2005	2005	https://lpsn.dsmz.de/species/martelella-mediterranea	Martelella	Rhizobiaceae	Hyphomicrobiales	Alphaproteobacteria	Pseudomonadota	Pseudomonadati
Novosphingopyxis baekryungensis	B	2	2		10	Slight	s	p	Yoon et al. 2005	2005	https://lpsn.dsmz.de/species/novosphingopyxis-baekryungensis	Novosphingopyxis	Sphingomonadaceae	Sphingomonadales	Alphaproteobacteria	Pseudomonadota	Pseudomonadati
Photobacterium lipolyticum	B	1	2		6	Slight	s	p	Yoon et al 2005	2005	https://lpsn.dsmz.de/species/photobacterium-lipolyticum	Photobacterium	Vibrionaceae	Vibrionales	Gammaproteobacteria	Pseudomonadota	Pseudomonadati
Pontixanthobacter luteolus	B	2	2		9	Slight	s	p	Yoon et al. 2005	2005	https://lpsn.dsmz.de/species/pontixanthobacter-luteolus	Pontixanthobacter	Erythrobacteraceae	Sphingomonadales	Alphaproteobacteria	Pseudomonadota	Pseudomonadati
Shewanella sediminis	B	2	2	1	4	Moderate	s	p	Zhao et al 2005	2005	https://lpsn.dsmz.de/species/shewanella-sediminis	Shewanella	Shewanellaceae	Alteromonadales	Gammaproteobacteria	Pseudomonadota	Pseudomonadati
Ferrimonas marina	B	3	3	1.5	3.5	No Class	s	p	Katsuta et al 2005	2005	https://lpsn.dsmz.de/species/ferrimonas-marina	Ferrimonas	Ferrimonadaceae	Alteromonadales	Gammaproteobacteria	Pseudomonadota	Pseudomonadati
Halolactibacillus halophilus	B	2	3	0	24	Slight	s	p	Ishikawa et al. 2005	2005	https://lpsn.dsmz.de/species/halolactibacillus-halophilus	Halolactibacillus	Bacillaceae	Caryophanales	Bacilli	Bacillota	Bacillati
Halolactibacillus miurensis	B	2.5	3	0	25.5	Slight	s	p	Ishikawa et al. 2005	2005	https://lpsn.dsmz.de/species/halolactibacillus-miurensis	Halolactibacillus	Bacillaceae	Caryophanales	Bacilli	Bacillota	Bacillati
Maribacter dokdonensis	B	2	3		10	Slight	s	p	Yoon et al. 2005	2005	https://lpsn.dsmz.de/species/maribacter-dokdonensis	Maribacter	Flavobacteriaceae	Flavobacteriales	Flavobacteriia	Bacteroidota	Pseudomonadati
Marinomonas dokdonensis	B	2	3	0.5	10	Slight	s	p	Yoon et al. 2005	2005	https://lpsn.dsmz.de/species/marinomonas-dokdonensis	Marinomonas	Oceanospirillaceae	Oceanospirillales	Gammaproteobacteria	Pseudomonadota	Pseudomonadati
Metabacillus litoralis	B	2	3		11	Slight	s	p	Yoon and Oh 2005	2005	https://lpsn.dsmz.de/species/metabacillus-litoralis	Metabacillus	Bacillaceae	Caryophanales	Bacilli	Bacillota	Bacillati
Parasphingorhabdus flavimaris	B	2	3		6	Slight	s	s	Yoon and Oh 2005 / Feng et al 2020	2005	https://lpsn.dsmz.de/species/parasphingorhabdus-flavimaris	Parasphingorhabdus	Sphingomonadaceae	Sphingomonadales	Alphaproteobacteria	Pseudomonadota	Pseudomonadati
Photobacterium aplysiae	B	3	3	1	5	Slight	s	p	Seo et al. 2005	2005	https://lpsn.dsmz.de/species/photobacterium-aplysiae	Photobacterium	Vibrionaceae	Vibrionales	Gammaproteobacteria	Pseudomonadota	Pseudomonadati
Psychrobacter alimentarius	B	2	3	0	12	Moderate	s	p	Yoon et al. 2005	2005	https://lpsn.dsmz.de/species/psychrobacter-alimentarius	Psychrobacter	Moraxellaceae	Pseudomonadales	Gammaproteobacteria	Pseudomonadota	Pseudomonadati
Psychrobacter aquimaris	B	2	3	0	12	Slight	s	p	Yoon et al. 2005	2005	https://lpsn.dsmz.de/species/psychrobacter-aquimaris	Psychrobacter	Moraxellaceae	Pseudomonadales	Gammaproteobacteria	Pseudomonadota	Pseudomonadati
Psychrobacter celer	B	2	3	0	16	Slight	s	p	Yoon et al 2005	2005	https://lpsn.dsmz.de/species/psychrobacter-celer	Psychrobacter	Moraxellaceae	Pseudomonadales	Gammaproteobacteria	Pseudomonadota	Pseudomonadati
Psychrobacter namhaensis	B	2	3	0	19	Slight	s	p	Yoon et al. 2005	2005	https://lpsn.dsmz.de/species/psychrobacter-namhaensis	Psychrobacter	Moraxellaceae	Pseudomonadales	Gammaproteobacteria	Pseudomonadota	Pseudomonadati
Qipengyuania gaetbuli	B	2	3			Slight	s	p	Yoon et al. 2005	2005	https://lpsn.dsmz.de/species/qipengyuania-gaetbuli	Qipengyuania	Erythrobacteraceae	Sphingomonadales	Alphaproteobacteria	Pseudomonadota	Pseudomonadati
Qipengyuania seohaensis	B	2	3			Slight	s	p	Yoon et al. 2005	2005	https://lpsn.dsmz.de/species/qipengyuania-seohaensis	Qipengyuania	Erythrobacteraceae	Sphingomonadales	Alphaproteobacteria	Pseudomonadota	Pseudomonadati
Roseivirga ehrenbergii	B	2	3		9	Slight	s	p	Yoon et al 2005 / Nedashkovskaya et al 2005	2005	https://lpsn.dsmz.de/species/roseivirga-ehrenbergii	Roseivirga	Roseivirgaceae	Cytophagales	Cytophagia	Bacteroidota	Pseudomonadati
Arcobacter halophilus	B	3.5	3.5	0.5	13.5	No Class	s	p	Donachie et al. 2005	2005	https://lpsn.dsmz.de/species/arcobacter-halophilus	Arcobacter	Arcobacteraceae	Campylobacterales	Epsilonproteobacteria	Pseudomonadota	Pseudomonadati
Alteromonas chungwhensis	B	2	5		15	Moderate	s	p	Jeon et al. 2005	2005	https://lpsn.dsmz.de/species/alteromonas-chungwhensis	Alteromonas	Alteromonadaceae	Alteromonadales	Gammaproteobacteria	Pseudomonadota	Pseudomonadati
Halobacillus yeomjeoni	B	3	5	0.5	21	No Class	s	p	Yoon et al. 2005	2005	https://lpsn.dsmz.de/species/halobacillus-yeomjeoni	Halobacillus	Bacillaceae	Caryophanales	Bacilli	Bacillota	Bacillati
Leeuwenhoekiella aequorea	B	0	5	0	15	Tolerant	s	p	Nedashkovskaya et al 2005	2005	https://lpsn.dsmz.de/species/leeuwenhoekiella-aequorea	Leeuwenhoekiella	Flavobacteriaceae	Flavobacteriales	Flavobacteriia	Bacteroidota	Pseudomonadati
Palleronia marisminoris	B	5	5	0.5	15	Moderate	s	p	Martínez-Checa et al 2005	2005	https://lpsn.dsmz.de/species/palleronia-marisminoris	Palleronia	Roseobacteraceae	Rhodobacterales	Alphaproteobacteria	Pseudomonadota	Pseudomonadati
Pontibacillus chungwhensis	B	2	5	1	15	Moderate	s	p	Lim et al 2005	2005	https://lpsn.dsmz.de/species/pontibacillus-chungwhensis	Pontibacillus	Bacillaceae	Caryophanales	Bacilli	Bacillota	Bacillati
Pontibacillus marinus	B	2	5	1	9	Moderate	s	p	Lim et al. 2005	2005	https://lpsn.dsmz.de/species/pontibacillus-marinus	Pontibacillus	Bacillaceae	Caryophanales	Bacilli	Bacillota	Bacillati
Virgibacillus dokdonensis	B	4	5	0	23	Slight	s	p	Yoon et al. 2005	2005	https://lpsn.dsmz.de/species/virgibacillus-dokdonensis	Virgibacillus	Bacillaceae	Caryophanales	Bacilli	Bacillota	Bacillati
Hahella ganghwensis	B	4	6	1	10	No Class	Sea salts	p	Baik et al 2005	2005	https://lpsn.dsmz.de/species/hahella-ganghwensis	Hahella	Hahellaceae	Oceanospirillales	Gammaproteobacteria	Pseudomonadota	Pseudomonadati
Shouchella oshimensis	B	7	7	0	20	Moderate	s	p	Yumoto et al. 2005	2005	https://lpsn.dsmz.de/species/shouchella-oshimensis	Shouchella	Bacillaceae	Caryophanales	Bacilli	Bacillota	Bacillati
Alcanivorax dieselolei	B	3	7.5	1	15	No Class	s	p	Lio and Shao 2005	2005	https://lpsn.dsmz.de/species/alcanivorax-dieselolei	Alcanivorax	Alcanivoracaceae	Oceanospirillales	Gammaproteobacteria	Pseudomonadota	Pseudomonadati
Halomonas almeriensis	B	7.5	7.5	5	25	Moderate	Sea salts	p	Martínez-Checa et al 2005	2005	https://lpsn.dsmz.de/species/halomonas-almeriensis	Halomonas	Halomonadaceae	Oceanospirillales	Gammaproteobacteria	Pseudomonadota	Pseudomonadati
Tenuibacillus multivorans	B	5	8	1	20	Moderate	s	p	Ren and Zhou 2005	2005	https://lpsn.dsmz.de/species/tenuibacillus-multivorans	Tenuibacillus	Bacillaceae	Caryophanales	Bacilli	Bacillota	Bacillati
Alkalibacillus filiformis	B	10	10	0	18	No Class	s	p	Romano et al 2005	2005	https://lpsn.dsmz.de/species/alkalibacillus-filiformis	Alkalibacillus	Bacillaceae	Caryophanales	Bacilli	Bacillota	Bacillati
Alteromonas hispanica	B	7.5	10	7.5	15	Moderate	s	p	Martínez-Checa et al 2005	2005	https://lpsn.dsmz.de/species/alteromonas-hispanica	Alteromonas	Alteromonadaceae	Alteromonadales	Gammaproteobacteria	Pseudomonadota	Pseudomonadati
Halobacillus aidingensis	B	10	10	0.5	20	Moderate	s	p	Liu et al. 2005	2005	https://lpsn.dsmz.de/species/halobacillus-aidingensis	Halobacillus	Bacillaceae	Caryophanales	Bacilli	Bacillota	Bacillati
Halobacillus dabanensis	B	10	10	0.5	25	Moderate	s	p	Liu et al. 2005	2005	https://lpsn.dsmz.de/species/halobacillus-dabanensis	Halobacillus	Bacillaceae	Caryophanales	Bacilli	Bacillota	Bacillati
Idiomarina seosinensis	B	5	10	1	20	No Class	Sea salt	p	Choi and Cho 2005	2005	https://lpsn.dsmz.de/species/idiomarina-seosinensis	Idiomarina	Idiomarinaceae	Alteromonadales	Gammaproteobacteria	Pseudomonadota	Pseudomonadati
Lentibacillus juripiscarius	B	10	10	3	30	Moderate	s	p	Namwong et al. 2005	2005	https://lpsn.dsmz.de/species/lentibacillus-juripiscarius	Lentibacillus	Bacillaceae	Caryophanales	Bacilli	Bacillota	Bacillati
Oceanobacillus oncorhynchi	B	7	10	0	22	Tolerant	s	p	Yumoto et al 2005	2005	https://lpsn.dsmz.de/species/oceanobacillus-oncorhynchi	Oceanobacillus	Bacillaceae	Caryophanales	Bacilli	Bacillota	Bacillati
Salinibacillus aidingensis	B	10	10			Moderate	s	p	Ren and Zhou 2005	2005	https://lpsn.dsmz.de/species/salinibacillus-aidingensis	Salinibacillus	Bacillaceae	Caryophanales	Bacilli	Bacillota	Bacillati
Thalassobacillus devorans	B	7.5	10	0.5	20	Moderate	s	p	García et al. 2005	2005	https://lpsn.dsmz.de/species/thalassobacillus-devorans	Thalassobacillus	Bacillaceae	Caryophanales	Bacilli	Bacillota	Bacillati
Alkalibacillus salilacus	B	10	12	5	20	Moderate	s	p	Jeon et al. 2005	2005	https://lpsn.dsmz.de/species/alkalibacillus-salilacus	Alkalibacillus	Bacillaceae	Caryophanales	Bacilli	Bacillota	Bacillati
Halomonas taeanensis	B	10	12	1	25	Moderate	s	p	Lee et al. 2005	2005	https://lpsn.dsmz.de/species/halomonas-taeanensis	Halomonas	Halomonadaceae	Oceanospirillales	Gammaproteobacteria	Pseudomonadota	Pseudomonadati
Lentibacillus salarius	B	12	14	1	20	Moderate	s	p	Jeon et al. 2005	2005	https://lpsn.dsmz.de/species/lentibacillus-salarius	Lentibacillus	Bacillaceae	Caryophanales	Bacilli	Bacillota	Bacillati
Desulfonatronum cooperativum	B	5	15	1	80	Tolerant	s	g	Zhilina et al 2005	2005	https://lpsn.dsmz.de/species/desulfonatronum-cooperativum	Desulfonatronum	Desulfonatronaceae	Desulfovibrionales	Deltaproteobacteria	Pseudomonadota	Pseudomonadati
Lentibacillus lacisalsi	B	12	15	5	25	Moderate	s	p	Lee et al. 2005	2005	https://lpsn.dsmz.de/species/lentibacillus-lacisalsi	Lentibacillus	Bacillaceae	Caryophanales	Bacilli	Bacillota	Bacillati
Salinibacillus kushneri	B	12	15			Moderate	s	p	Ren and Zhou 2005	2005	https://lpsn.dsmz.de/species/salinibacillus-kushneri	Salinibacillus	Bacillaceae	Caryophanales	Bacilli	Bacillota	Bacillati
Alkalicoccus saliphilus	B	16	16	1	25	No Class	s	p	Romano et al 2005 / Zhao et al 2017	2005	https://lpsn.dsmz.de/species/alkalicoccus-saliphilus	Alkalicoccus	Bacillaceae	Caryophanales	Bacilli	Bacillota	Bacillati
Alkalihalobacterium bogoriense	B				2	Tolerant	s	m	Vargas et al 2005	2005	https://lpsn.dsmz.de/species/alkalihalobacterium-bogoriense	Alkalihalobacterium	Bacillaceae	Caryophanales	Bacilli	Bacillota	Bacillati
Christiangramia echinicola	B			1	15	No Class	s	p	Nedashkovskaya et al 2005	2005	https://lpsn.dsmz.de/species/christiangramia-echinicola	Christiangramia	Flavobacteriaceae	Flavobacteriales	Flavobacteriia	Bacteroidota	Pseudomonadati
Jannaschia cystaugens	B			0.85	7	Slight	Marine Salts	p	Macían et al 2005 / Adachi et al 2004	2005	https://lpsn.dsmz.de/species/jannaschia-cystaugens	Jannaschia	Roseobacteraceae	Rhodobacterales	Alphaproteobacteria	Pseudomonadota	Pseudomonadati
Jannaschia rubra	B			0.34	9	Slight	Sea salt	p	Macían et al .2005	2005	https://lpsn.dsmz.de/species/jannaschia-rubra	Jannaschia	Roseobacteraceae	Rhodobacterales	Alphaproteobacteria	Pseudomonadota	Pseudomonadati
Marinobacter bryozoorum	B			1	18	No Class	s	p	Romanenko et al. 2005	2005	https://lpsn.dsmz.de/species/marinobacter-bryozoorum	Marinobacter	Alteromonadaceae	Alteromonadales	Gammaproteobacteria	Pseudomonadota	Pseudomonadati
Marinobacter sediminum	B			0.5	18	No Class	s	p	Romanenko et al. 2005	2005	https://lpsn.dsmz.de/species/marinobacter-sediminum	Marinobacter	Alteromonadaceae	Alteromonadales	Gammaproteobacteria	Pseudomonadota	Pseudomonadati
Nereida ignava	B			1.36	8	Slight	Marine Salts	p	Pujalte et al 2005	2005	https://lpsn.dsmz.de/species/nereida-ignava	Nereida	Roseobacteraceae	Rhodobacterales	Alphaproteobacteria	Pseudomonadota	Pseudomonadati
Nonlabens tegetincola	B			2	4	Tolerant	s	p	Lau et al 2005	2005	https://lpsn.dsmz.de/species/nonlabens-tegetincola	Nonlabens	Flavobacteriaceae	Flavobacteriales	Flavobacteriia	Bacteroidota	Pseudomonadati
Owenweeksia hongkongensis	B			1	7.5	Moderate	s	p	Lau et al 2005	2005	https://lpsn.dsmz.de/species/owenweeksia-hongkongensis	Owenweeksia	Schleiferiaceae	Flavobacteriales	Flavobacteriia	Bacteroidota	Pseudomonadati
Pibocella ponti	B			1	13	Moderate	s	p	Nedashkovskaya et al 2005	2005	https://lpsn.dsmz.de/species/pibocella-ponti	Pibocella	Flavobacteriaceae	Flavobacteriales	Flavobacteriia	Bacteroidota	Pseudomonadati
Psychrobacter aquaticus	B			0	8	Tolerant	s	p	Shivaji et al 2005	2005	https://lpsn.dsmz.de/species/psychrobacter-aquaticus	Psychrobacter	Moraxellaceae	Pseudomonadales	Gammaproteobacteria	Pseudomonadota	Pseudomonadati
Psychrobacter vallis	B			0	8	Tolerant	s	p	Shivaji et al 2005	2005	https://lpsn.dsmz.de/species/psychrobacter-vallis	Psychrobacter	Moraxellaceae	Pseudomonadales	Gammaproteobacteria	Pseudomonadota	Pseudomonadati
Shouchella patagoniensis	B			5	15	Tolerant	s	p	Olivera et al 2005	2005	https://lpsn.dsmz.de/species/bacillus-patagoniensis	Shouchella	Bacillaceae	Caryophanales	Bacilli	Bacillota	Bacillati
Thalassobius mediterraneus	B			1.4	8	Slight	Marine salts	p	Arahal et al. 2005	2005	https://lpsn.dsmz.de/species/thalassobius-mediterraneus	Thalassobius	Roseobacteraceae	Rhodobacterales	Alphaproteobacteria	Pseudomonadota	Pseudomonadati
Ruegeria gelatinovorans	B					Slight	s	m	Arahal et al. 2005	2005	https://lpsn.dsmz.de/species/ruegeria-gelatinovorans	Ruegeria	Roseobacteraceae	Rhodobacterales	Alphaproteobacteria	Pseudomonadota	Pseudomonadati
Methanococcoides alaskense	A	0.3	0.4	0.1	0.8	Slight	s	m	Singh et al. 2005	2005	https://lpsn.dsmz.de/species/methanococcoides-alaskense	Methanococcoides	Methanosarcinaceae	Methanosarcinales	Methanosarcinia	Methanobacteriota	Methanobacteriati
Halalkalicoccus tibetensis	A	3.4	3.4	1.4	5.2	Extreme	s	m	Xue et al 2005	2005	https://lpsn.dsmz.de/species/halalkalicoccus-tibetensis	Halalkalicoccus	Halalkalicoccaceae	Halobacteriales	Halobacteria	Methanobacteriota	Methanobacteriati
Natrinema saccharevitans	A	3	3.4	1.71	5.1	Extreme	s	m	Xu et al 2005	2005	https://lpsn.dsmz.de/species/natrinema-saccharevitans	Natrinema	Natrialbaceae	Halobacteriales	Halobacteria	Methanobacteriota	Methanobacteriati
Natronobacterium lacisalsi	A	2.6	4.3	1.7		Extreme	s	m	Xu et al. 2005	2005	https://lpsn.dsmz.de/species/natronobacterium-lacisalsi	Natronobacterium	Natrialbaceae	Halobacteriales	Halobacteria	Methanobacteriota	Methanobacteriati
Halorubrum alkaliphilum	A	3.9	4.3	1.8	5.2	No Class	s	m	Feng et al 2005	2005	https://lpsn.dsmz.de/species/halorubrum-alkaliphilum	Halorubrum	Haloferacaceae	Halobacteriales	Halobacteria	Methanobacteriota	Methanobacteriati
Natrinema altunense	A	3	4.3	1.7	5.1	Extreme	s	m	Xu et al. 2005	2005	https://lpsn.dsmz.de/species/natrinema-altunense	Natrinema	Natrialbaceae	Halobacteriales	Halobacteria	Methanobacteriota	Methanobacteriati
Methanosarcina baltica	A	0.3	0.4	0.1	0.7	Slight	Na+	m	Singh et al. 2005	2005	https://lpsn.dsmz.de/species/methanosarcina-baltica	Methanosarcina	Methanosarcinaceae	Methanosarcinales	Methanosarcinia	Methanobacteriota	Methanobacteriati
Marinimicrobium agarilyticum	B	0	1	0	13	Tolerant	s	p	Lim et al 2006	2006	https://lpsn.dsmz.de/species/marinimicrobium-agarilyticum	Marinimicrobium	Cellvibrionaceae	Cellvibrionales	Gammaproteobacteria	Pseudomonadota	Pseudomonadati
Paucisalibacillus globulus	B	1	1	0	8	Slight	s	p	Nunes et al. 2006	2006	https://lpsn.dsmz.de/species/paucisalibacillus-globulus	Paucisalibacillus	Bacillaceae	Caryophanales	Bacilli	Bacillota	Bacillati
Hydrogenovibrio halophilus	B	1.5	1.5	0.5	3.5	Moderate	s	m	Sorokin et al. 2006 / Boden et al 2017	2006	https://lpsn.dsmz.de/species/hydrogenovibrio-halophilus	Hydrogenovibrio	Piscirickettsiaceae	Beggiatoales	Gammaproteobacteria	Pseudomonadota	Pseudomonadati
Photobacterium halotolerans	B	1.5	1.5	0	8	Tolerant	s	p	Rivas et al 2006	2006	https://lpsn.dsmz.de/species/photobacterium-halotolerans	Photobacterium	Vibrionaceae	Vibrionales	Gammaproteobacteria	Pseudomonadota	Pseudomonadati
Desulfobaculum bizertense	B	2	2	0.5	5	Slight	s	p	Haouari et al 2006	2006	https://lpsn.dsmz.de/species/desulfobaculum-bizertense	Desulfobaculum	Desulfovibrionaceae	Desulfovibrionales	Deltaproteobacteria	Pseudomonadota	Pseudomonadati
Erythrobacter dokdonensis	B	2	2	0	7	Slight	s	p	Yoon et al. 2006	2006	https://lpsn.dsmz.de/species/erythrobacter-dokdonensis	Erythrobacter	Erythrobacteraceae	Sphingomonadales	Alphaproteobacteria	Pseudomonadota	Pseudomonadati
Photobacterium ganghwense	B	2	2	1	7	No Class	s	p	Park et al. 2006	2006	https://lpsn.dsmz.de/species/photobacterium-ganghwense	Photobacterium	Vibrionaceae	Vibrionales	Gammaproteobacteria	Pseudomonadota	Pseudomonadati
Polaribacter dokdonensis	B	2	2			Slight	s	p	Yoon et al. 2006	2006	https://lpsn.dsmz.de/species/polaribacter-dokdonensis	Polaribacter	Flavobacteriaceae	Flavobacteriales	Flavobacteriia	Bacteroidota	Pseudomonadati
Shewanella halifaxensis	B	2	2	0.5	4	Slight	s	p	Zhao et al 2006	2006	https://lpsn.dsmz.de/species/shewanella-halifaxensis	Shewanella	Shewanellaceae	Alteromonadales	Gammaproteobacteria	Pseudomonadota	Pseudomonadati
Halovibrio denitrificans	B	2	2.5	2	5	Extreme	s	m	Sorokin et al. 2006	2006	https://lpsn.dsmz.de/species/halovibrio-denitrificans	Halovibrio	Halomonadaceae	Oceanospirillales	Gammaproteobacteria	Pseudomonadota	Pseudomonadati
Bacillus seohaeanensis	B	3	3	0	10	Tolerant	s	p	Lee et al 2006	2006	https://lpsn.dsmz.de/species/bacillus-seohaeanensis	Bacillus	Bacillaceae	Caryophanales	Bacilli	Bacillota	Bacillati
Clostridium ganghwense	B	3	3	1	9	No Class	Sea salts	p	Kim et al. 2006	2006	https://lpsn.dsmz.de/species/clostridium-ganghwense	Clostridium	Clostridiaceae	Eubacteriales	Clostridia	Bacillota	Bacillati
Halospina denitrificans	B	2.5	3	2	5	Extreme	s	m	Sorokin et al. 2006	2006	https://lpsn.dsmz.de/species/halospina-denitrificans	Halospina	Hahellaceae	Oceanospirillales	Gammaproteobacteria	Pseudomonadota	Pseudomonadati
Marinimicrobium koreense	B	1	3	0	12	Tolerant	s	p	Lim et al 2006	2006	https://lpsn.dsmz.de/species/marinimicrobium-koreense	Marinimicrobium	Cellvibrionaceae	Cellvibrionales	Gammaproteobacteria	Pseudomonadota	Pseudomonadati
Marinomonas ostreistagni	B	3	3	1	10	No Class	s	p	Lau et al. 2006	2006	https://lpsn.dsmz.de/species/marinomonas-ostreistagni	Marinomonas	Oceanospirillaceae	Oceanospirillales	Gammaproteobacteria	Pseudomonadota	Pseudomonadati
Nesterenkonia aethiopica	B	3	3	3	12	Moderate	s	p	Delgado et al. 2006	2006	https://lpsn.dsmz.de/species/nesterenkonia-aethiopica	Nesterenkonia	Micrococcaceae	Micrococcales	Actinomycetes	Actinomycetota	Bacillati
Rhodovulum marinum	B	1	3	0.05	8	Slight	s	p	Srinivas et al. 2006	2006	https://lpsn.dsmz.de/species/rhodovulum-marinum	Rhodovulum	Roseobacteraceae	Rhodobacterales	Alphaproteobacteria	Pseudomonadota	Pseudomonadati
Roseibium marinum	B	3	3	3	6	No Class	s	p	Kim et al. 2006	2006	https://lpsn.dsmz.de/species/roseibium-marinum	Roseibium	Stappiaceae	Hyphomicrobiales	Alphaproteobacteria	Pseudomonadota	Pseudomonadati
Salipiger bermudensis	B	3	3	0.25	15	Slight	s	p	Cho and Giovannoni 2006	2006	https://lpsn.dsmz.de/species/salipiger-bermudensis	Salipiger	Roseobacteraceae	Rhodobacterales	Alphaproteobacteria	Pseudomonadota	Pseudomonadati
Thalassotalea agarivorans	B	3	3	1	5	No Class	s	p	Jean et al 2006 / Zhang et al 2014	2006	https://lpsn.dsmz.de/species/thalassotalea-agarivorans	Thalassotalea	Colwelliaceae	Alteromonadales	Gammaproteobacteria	Pseudomonadota	Pseudomonadati
Ornithinibacillus bavariensis	B	0.5	4	0	10	Tolerant	s	p	Mayr et al 2006	2006	https://lpsn.dsmz.de/species/ornithinibacillus-bavariensis	Ornithinibacillus	Bacillaceae	Caryophanales	Bacilli	Bacillota	Bacillati
Pseudidiomarina taiwanensis	B	1	4	0.5	11	No Class	s	p	Jean et al 2006	2006	https://lpsn.dsmz.de/species/pseudidiomarina-taiwanensis	Pseudidiomarina	Idiomarinaceae	Alteromonadales	Gammaproteobacteria	Pseudomonadota	Pseudomonadati
Bacillus taeanensis	B	2	5	0	12	Moderate	s	p	Lim et al. 2006	2006	https://lpsn.dsmz.de/species/bacillus-taeanensis	Bacillus	Bacillaceae	Caryophanales	Bacilli	Bacillota	Bacillati
Halalkalibacter okhensis	B	5	5	0	10	Tolerant	s	p	Nowlan et al 2006	2006	https://lpsn.dsmz.de/species/halalkalibacter-okhensis	Halalkalibacter	Bacillaceae	Caryophanales	Bacilli	Bacillota	Bacillati
Jannaschia seosinensis	B	3	5	3	10	Slight	Sea salt	p	Choi et al. 2006	2006	https://lpsn.dsmz.de/species/jannaschia-seosinensis	Jannaschia	Roseobacteraceae	Rhodobacterales	Alphaproteobacteria	Pseudomonadota	Pseudomonadati
Nesterenkonia jeotgali	B	2	5	0	16	Slight	s	p	Yoon et al 2006	2006	https://lpsn.dsmz.de/species/nesterenkonia-jeotgali	Nesterenkonia	Micrococcaceae	Micrococcales	Actinomycetes	Actinomycetota	Bacillati
Paracoccus homiensis	B	3	5	0	15	Moderate	s	p	Kim et al 2006	2006	https://lpsn.dsmz.de/species/paracoccus-homiensis	Paracoccus	Paracoccaceae	Rhodobacterales	Alphaproteobacteria	Pseudomonadota	Pseudomonadati
Pseudidiomarina homiensis	B	3	5	1	15	No Class	s	p	Kwon et al. 2006 / Jean et al. 2009	2006	https://lpsn.dsmz.de/species/pseudidiomarina-homiensis	Pseudidiomarina	Idiomarinaceae	Alteromonadales	Gammaproteobacteria	Pseudomonadota	Pseudomonadati
Marinobacter algicola	B	3	6	1	12	Moderate	s	p	Green et al. 2006	2006	https://lpsn.dsmz.de/species/marinobacter-algicola	Marinobacter	Alteromonadaceae	Alteromonadales	Gammaproteobacteria	Pseudomonadota	Pseudomonadati
Marinobacter vinifirmus	B	5	6	0	20	Moderate	s	p	Libgott et al. 2006	2006	https://lpsn.dsmz.de/species/marinobacter-vinifirmus	Marinobacter	Alteromonadaceae	Alteromonadales	Gammaproteobacteria	Pseudomonadota	Pseudomonadati
Glaciecola nitratireducens	B	4	7	2	9	No Class	Sea salts	p	Baik et al 2006	2006	https://lpsn.dsmz.de/species/glaciecola-nitratireducens	Glaciecola	Alteromonadaceae	Alteromonadales	Gammaproteobacteria	Pseudomonadota	Pseudomonadati
Chromohalobacter nigrandesensis	B	7.5	7.5	0.5	25	Moderate	Total salts	p	Prado et al. 2006	2006	https://lpsn.dsmz.de/species/chromohalobacter-nigrandesensis	Chromohalobacter	Halomonadaceae	Oceanospirillales	Gammaproteobacteria	Pseudomonadota	Pseudomonadati
Marinobacter koreensis	B	3	8	0.5	20	Moderate	s	p	Kim et al. 2006	2006	https://lpsn.dsmz.de/species/marinobacter-koreensis	Marinobacter	Alteromonadaceae	Alteromonadales	Gammaproteobacteria	Pseudomonadota	Pseudomonadati
Gracilibacillus orientalis	B	10	10	1	20	Moderate	s	p	Carrasco et al. 2006	2006	https://lpsn.dsmz.de/species/gracilibacillus-orientalis	Gracilibacillus	Bacillaceae	Caryophanales	Bacilli	Bacillota	Bacillati
Psychromonas ingrahamii	B	1	10	1	20	Moderate	s	p	Auman et al 2006	2006	https://lpsn.dsmz.de/species/psychromonas-ingrahamii	Psychromonas	Psychromonadaceae	Alteromonadales	Gammaproteobacteria	Pseudomonadota	Pseudomonadati
Sinobaca qinghaiensis	B	10	10	1	25	Moderate	s	p	Li et al 2006	2006	https://lpsn.dsmz.de/species/sinobaca-qinghaiensis	Sinobaca	Bacillaceae	Caryophanales	Bacilli	Bacillota	Bacillati
Salibacterium salarium	B	10	12	3	20	Moderate	s	p	Lim et al. 2006 / Gupta et al 2020	2006	https://lpsn.dsmz.de/species/salibacterium-salarium	Salibacterium	Bacillaceae	Caryophanales	Bacilli	Bacillota	Bacillati
Salicola marasensis	B	15	15	10	30	Extreme	s	p	Maturramo et al. 2006	2006	https://lpsn.dsmz.de/species/salicola-marasensis	Salicola	Incertae sedis	Oceanospirillales	Gammaproteobacteria	Pseudomonadota	Pseudomonadati
Salicola salis	B	15	20	10	25	Extreme	s	p	Kharroub et al. 2006	2006	https://lpsn.dsmz.de/species/salicola-salis	Salicola	Incertae sedis	Oceanospirillales	Gammaproteobacteria	Pseudomonadota	Pseudomonadati
Lentibacillus halophilus	B	20	26	12	30	Extreme	s	p	Tanasupawat et al. 2006	2006	https://lpsn.dsmz.de/species/lentibacillus-halophilus	Lentibacillus	Bacillaceae	Caryophanales	Bacilli	Bacillota	Bacillati
Thermovirga lienii	B	20	30	5	80	Slight	s	g	Dahle and Bikeland 2006	2006	https://lpsn.dsmz.de/species/thermovirga-lienii	Thermovirga	Synergistaceae	Synergistales	Synergistia	Synergistota	Thermotogati
Desulfovermiculus utahensis	B	80	100	20	240	Moderate	s	g	Jakobsen et al. 2006	2006	https://lpsn.dsmz.de/species/desulfovermiculus-utahensis	Desulfovermiculus	Desulfohalobiaceae	Desulfovibrionales	Deltaproteobacteria	Pseudomonadota	Pseudomonadati
Oceanisphaera donghaensis	B			0.5	8	Moderate	s	p	Park et al. 2006	2006	https://lpsn.dsmz.de/species/oceanisphaera-donghaensis	Oceanisphaera	Aeromonadaceae	Aeromonadales	Gammaproteobacteria	Pseudomonadota	Pseudomonadati
Paraglaciecola chathamensis	B			1	10	Moderate	s	p	Matsuyama et al 2006	2006	https://lpsn.dsmz.de/species/paraglaciecola-chathamensis	Paraglaciecola	Alteromonadaceae	Alteromonadales	Gammaproteobacteria	Pseudomonadota	Pseudomonadati
Halorubrum aidingense	A	2.6	2.6	1.7	4.3	Extreme	s	m	Cui et al. 2006	2006	https://lpsn.dsmz.de/species/halorubrum-aidingense	Halorubrum	Haloferacaceae	Halobacteriales	Halobacteria	Methanobacteriota	Methanobacteriati
Halorubrum lipolyticum	A	2.6	2.6	1.7	4.8	Extreme	s	m	Cui et al. 2006	2006	https://lpsn.dsmz.de/species/halorubrum-lipolyticum	Halorubrum	Haloferacaceae	Halobacteriales	Halobacteria	Methanobacteriota	Methanobacteriati
Natrinema limicola	A	3.1	3.1	1.7	5.1	Extreme	s	m	Cui et al. 2006	2006	https://lpsn.dsmz.de/species/natrinema-limicola	Natrinema	Natrialbaceae	Halobacteriales	Halobacteria	Methanobacteriota	Methanobacteriati
Natronorubrum aibiense	A	2.6	3.1	2	4.3	Extreme	s	m	Cui et al. 2006	2006	https://lpsn.dsmz.de/species/natronorubrum-aibiense	Natronorubrum	Natrialbaceae	Halobacteriales	Halobacteria	Methanobacteriota	Methanobacteriati
Halorubrum orientale	A	3.4	3.4	2.5	5	No Class	s	m	Castillo et al. 2006	2006	https://lpsn.dsmz.de/species/halorubrum-orientale	Halorubrum	Haloferacaceae	Halobacteriales	Halobacteria	Methanobacteriota	Methanobacteriati
Halostagnicola larsenii	A	3.4	3.4	2.5	5	Extreme	s	m	Castillo et al. 2006	2006	https://lpsn.dsmz.de/species/halostagnicola-larsenii	Halostagnicola	Natrialbaceae	Halobacteriales	Halobacteria	Methanobacteriota	Methanobacteriati
Halovivax asiaticus	A	3.4	3.4	2.5	4.3	Extreme	s	m	Castillo et al. 2006	2006	https://lpsn.dsmz.de/species/halovivax-asiaticus	Halovivax	Natrialbaceae	Halobacteriales	Halobacteria	Methanobacteriota	Methanobacteriati
Natrinema longum	A	3.1	3.4	1.7	5.2	Extreme	s	m	Cui et al. 2006 / Castillo et al 2006	2006	https://lpsn.dsmz.de/species/natrinema-longum	Natrinema	Natrialbaceae	Halobacteriales	Halobacteria	Methanobacteriota	Methanobacteriati
Halobacterium jilantaiense	A	3.1	3.5	2.7	5.2	No Class	s	m	Yang et al. 2006	2006	https://lpsn.dsmz.de/species/halobacterium-jilantaiense	Halobacterium	Halobacteriaceae	Halobacteriales	Halobacteria	Methanobacteriota	Methanobacteriati
Halococcus hamelinensis	A	15	15	12.5	30	No Class	s	p	Goh et al. 2006	2006	https://lpsn.dsmz.de/species/halococcus-hamelinensis	Halococcus	Halococcaceae	Halobacteriales	Halobacteria	Methanobacteriota	Methanobacteriati
Halorubrum ezzemoulense	A	20	20	15	25	Extreme	s	p	Kharroub et al 2006 / Mancinelli et al 2009	2006	https://lpsn.dsmz.de/species/halorubrum-ezzemoulense	Halorubrum	Haloferacaceae	Halobacteriales	Halobacteria	Methanobacteriota	Methanobacteriati
Thermobacillus composti	B	0	0	0	4.4	Tolerant	s	p	Watanabe et al 2007	2007	https://lpsn.dsmz.de/species/thermobacillus-composti	Thermobacillus	Paenibacillaceae	Caryophanales	Bacilli	Bacillota	Bacillati
Thiohalomonas nitratireducens	B	1	1	1	2.5	Moderate	s	m	Sorokin et al 2007	2007	https://lpsn.dsmz.de/species/thiohalomonas-nitratireducens	Thiohalomonas	Ectothiorhodospiraceae	Chromatiales	Gammaproteobacteria	Pseudomonadota	Pseudomonadati
Donghicola eburneus	B	2	2		11	Slight	s	p	Yoon et al. 2007	2007	https://lpsn.dsmz.de/species/donghicola-eburneus	Donghicola	Roseobacteraceae	Rhodobacterales	Alphaproteobacteria	Pseudomonadota	Pseudomonadati
Exiguobacterium profundum	B	0	2	0	11	Tolerant	s	p	Crapart et al 2007	2007	https://lpsn.dsmz.de/species/exiguobacterium-profundum	Exiguobacterium	Bacillaceae	Caryophanales	Bacilli	Bacillota	Bacillati
Methylohalomonas lacus	B	2	2	0.5	4	Moderate	s	m	Sorokin et al 2007	2007	https://lpsn.dsmz.de/species/methylohalomonas-lacus	Methylohalomonas	Ectothiorhodospiraceae	Chromatiales	Gammaproteobacteria	Pseudomonadota	Pseudomonadati
Methylonatrum kenyense	B	2	2	0.5	4	Moderate	s	m	Sorokin et al 2007	2007	https://lpsn.dsmz.de/species/methylonatrum-kenyense	Methylonatrum	Ectothiorhodospiraceae	Chromatiales	Gammaproteobacteria	Pseudomonadota	Pseudomonadati
Terribacillus saccharophilus	B	0	2	0	14	Tolerant	s	p	Kim et al 2007 / Krishnamurthi and Chakrabarrti 2008	2007	https://lpsn.dsmz.de/species/terribacillus-saccharophilus	Terribacillus	Bacillaceae	Caryophanales	Bacilli	Bacillota	Bacillati
Thiohalomonas denitrificans	B	1.5	2	1	3	Moderate	s	m	Sorokin et al 2007	2007	https://lpsn.dsmz.de/species/thiohalomonas-denitrificans	Thiohalomonas	Ectothiorhodospiraceae	Chromatiales	Gammaproteobacteria	Pseudomonadota	Pseudomonadati
Natranaerobius thermophilus	B	1.7	2.3	1.5	3.3	Extreme	s	m	Mesbah et al. 2007	2007	https://lpsn.dsmz.de/species/natranaerobius-thermophilus	Natranaerobius	Natranaerobiaceae	Natranaerobiales	Clostridia	Bacillota	Bacillati
Gracilibacillus boraciitolerans	B	0.5	3	0	11	Tolerant	s	p	Ahmed et al 2007	2007	https://lpsn.dsmz.de/species/gracilibacillus-boraciitolerans	Gracilibacillus	Bacillaceae	Caryophanales	Bacilli	Bacillota	Bacillati
Halotalea alkalilenta	B	0	3	0	15	Tolerant	s	p	Ntougias et al 2007	2007	https://lpsn.dsmz.de/species/halotalea-alkalilenta	Halotalea	Halomonadaceae	Oceanospirillales	Gammaproteobacteria	Pseudomonadota	Pseudomonadati
Nocardioides marinus	B	1	3	0.5	8	Slight	s	p	Choi et al 2007	2007	https://lpsn.dsmz.de/species/nocardioides-marinus	Nocardioides	Nocardioidaceae	Propionibacteriales	Actinomycetes	Actinomycetota	Bacillati
Oceanobacillus chironomi	B	1	3	0	11	Tolerant	s	p	Raats and Halpern 2007	2007	https://lpsn.dsmz.de/species/oceanobacillus-chironomi	Oceanobacillus	Bacillaceae	Caryophanales	Bacilli	Bacillota	Bacillati
Oceanobacillus profundus	B	1	3	0	14	Tolerant	s	p	Kim et al 2007	2007	https://lpsn.dsmz.de/species/oceanobacillus-profundus	Oceanobacillus	Bacillaceae	Caryophanales	Bacilli	Bacillota	Bacillati
Psychromonas hadalis	B	3	3			No Class	s	p	Nogi et al 2007	2007	https://lpsn.dsmz.de/species/psychromonas-hadalis	Psychromonas	Psychromonadaceae	Alteromonadales	Gammaproteobacteria	Pseudomonadota	Pseudomonadati
Alteromonas simiduii	B	2	4	0.5	13	No Class	s	p	Chiu et al 2007	2007	https://lpsn.dsmz.de/species/alteromonas-simiduii	Alteromonas	Alteromonadaceae	Alteromonadales	Gammaproteobacteria	Pseudomonadota	Pseudomonadati
Alteromonas tagae	B	2	4	0	14	No Class	s	p	Chiu et al 2007	2007	https://lpsn.dsmz.de/species/alteromonas-tagae	Alteromonas	Alteromonadaceae	Alteromonadales	Gammaproteobacteria	Pseudomonadota	Pseudomonadati
Clostridium aestuarii	B	4	4	1	10	No Class	Sea salts	p	Kim et al 2007	2007	https://lpsn.dsmz.de/species/clostridium-aestuarii	Clostridium	Clostridiaceae	Eubacteriales	Clostridia	Bacillota	Bacillati
Demequina aestuarii	B	2	4	0	12	Slight	s	p	Yi et al 2007	2007	https://lpsn.dsmz.de/species/demequina-aestuarii	Demequina	Demequinaceae	Micrococcales	Actinomycetes	Actinomycetota	Bacillati
Salinimicrobium catena	B	1	4	0.1	10	Moderate	s	p	Ying et al 2007 / Lim et al 2008	2007	https://lpsn.dsmz.de/species/salinimicrobium-catena	Salinimicrobium	Flavobacteriaceae	Flavobacteriales	Flavobacteriia	Bacteroidota	Pseudomonadati
Halomonas arcis	B	1	5	0	20	Tolerant	s	p	Xu et al 2007	2007	https://lpsn.dsmz.de/species/halomonas-arcis	Halomonas	Halomonadaceae	Oceanospirillales	Gammaproteobacteria	Pseudomonadota	Pseudomonadati
Halomonas kribbensis	B	5	5	1	14	Moderate	s	p	Jeon et al. 2007	2007	https://lpsn.dsmz.de/species/halomonas-kribbensis	Halomonas	Halomonadaceae	Oceanospirillales	Gammaproteobacteria	Pseudomonadota	Pseudomonadati
Halomonas subterranea	B	1	5	0	15	Tolerant	s	p	Xu et al 2007	2007	https://lpsn.dsmz.de/species/halomonas-subterranea	Halomonas	Halomonadaceae	Oceanospirillales	Gammaproteobacteria	Pseudomonadota	Pseudomonadati
Kushneria avicenniae	B	5	5	0	25	Moderate	s	p	Soto-Ramírez et al 2007 / Sánchez-Porro et al 2009	2007	https://lpsn.dsmz.de/species/kushneria-avicenniae	Kushneria	Halomonadaceae	Oceanospirillales	Gammaproteobacteria	Pseudomonadota	Pseudomonadati
Marinobacter salsuginis	B	5	5	1	20	Moderate	s	p	Antunes et al 2007	2007	https://lpsn.dsmz.de/species/marinobacter-salsuginis	Marinobacter	Alteromonadaceae	Alteromonadales	Gammaproteobacteria	Pseudomonadota	Pseudomonadati
Oceanidesulfovibrio marinus	B	2.5	5	0.5	11	Moderate	s	p	Thabet et al 2007	2007	https://lpsn.dsmz.de/species/oceanidesulfovibrio-marinus	Oceanidesulfovibrio	Desulfovibrionaceae	Desulfovibrionales	Deltaproteobacteria	Pseudomonadota	Pseudomonadati
Salinicoccus jeotgali	B	5	5	0.5	15	Moderate	s	p	Aslam et al 2007	2007	https://lpsn.dsmz.de/species/salinicoccus-jeotgali	Salinicoccus	Staphylococcaceae	Caryophanales	Bacilli	Bacillota	Bacillati
Halobacillus kuroshimensis	B	6	6	0.5	25	Moderate	s	p	Hua et al 2007	2007	https://lpsn.dsmz.de/species/halobacillus-kuroshimensis	Halobacillus	Bacillaceae	Caryophanales	Bacilli	Bacillota	Bacillati
Salirhabdus euzebyi	B	4	6	0	16	Tolerant	s	p	Albuquerque et al 2007	2007	https://lpsn.dsmz.de/species/salirhabdus-euzebyi	Salirhabdus	Bacillaceae	Caryophanales	Bacilli	Bacillota	Bacillati
Thalassococcus halodurans	B	2	6	2	18	Tolerant	s	p	Lee et al 2007	2007	https://lpsn.dsmz.de/species/thalassococcus-halodurans	Thalassococcus	Roseobacteraceae	Rhodobacterales	Alphaproteobacteria	Pseudomonadota	Pseudomonadati
Alkalicoccus chagannorensis	B	7	7	3	20	Moderate	s	p	Carrasco et al. 2007 / Gupta et al 2020	2007	https://lpsn.dsmz.de/species/alkalicoccus-chagannorensis	Alkalicoccus	Bacillaceae	Caryophanales	Bacilli	Bacillota	Bacillati
Sulfitobacter litoralis	B	6	7	1	10	No Class	s	p	Park et al 2007	2007	https://lpsn.dsmz.de/species/sulfitobacter-litoralis	Sulfitobacter	Roseobacteraceae	Rhodobacterales	Alphaproteobacteria	Pseudomonadota	Pseudomonadati
Halomonas saccharevitans	B	3	7.5	0.5	15	Moderate	s	p	Xu et al 2007	2007	https://lpsn.dsmz.de/species/halomonas-saccharevitans	Halomonas	Halomonadaceae	Oceanospirillales	Gammaproteobacteria	Pseudomonadota	Pseudomonadati
Marinobacter segnicrescens	B	4	8	1	15	Moderate	s	p	Guo et al 2007	2007	https://lpsn.dsmz.de/species/marinobacter-segnicrescens	Marinobacter	Alteromonadaceae	Alteromonadales	Gammaproteobacteria	Pseudomonadota	Pseudomonadati
Aquisalimonas asiatica	B	7	10	1	20	Moderate	Total salts	p	Márquez et al. 2007	2007	https://lpsn.dsmz.de/species/aquisalimonas-asiatica	Aquisalimonas	Ectothiorhodospiraceae	Chromatiales	Gammaproteobacteria	Pseudomonadota	Pseudomonadati
Halobacillus profundi	B	10	10	0.5	30	Moderate	s	p	Hua et al 2007	2007	https://lpsn.dsmz.de/species/halobacillus-profundi	Halobacillus	Bacillaceae	Caryophanales	Bacilli	Bacillota	Bacillati
Halomonas denitrificans	B	8	10	2	20	Moderate	s	p	Kim et al. 2007	2007	https://lpsn.dsmz.de/species/halomonas-denitrificans	Halomonas	Halomonadaceae	Oceanospirillales	Gammaproteobacteria	Pseudomonadota	Pseudomonadati
Kushneria indalinina	B	7.5	10	3	25	Moderate	s	p	Cabrera et al 2007 / Sánchez-Porro et al 2009	2007	https://lpsn.dsmz.de/species/kushneria-indalinina	Kushneria	Halomonadaceae	Oceanospirillales	Gammaproteobacteria	Pseudomonadota	Pseudomonadati
Modicisalibacter tunisiensis	B	10	10	1	25	Moderate	s	p	Gam et al 2007	2007	https://lpsn.dsmz.de/species/modicisalibacter-tunisiensis	Modicisalibacter	Halomonadaceae	Oceanospirillales	Gammaproteobacteria	Pseudomonadota	Pseudomonadati
Salimicrobium luteum	B	10	10	2	27	Moderate	s	p	Yoon et al 2007	2007	https://lpsn.dsmz.de/species/salimicrobium-luteum	Salimicrobium	Bacillaceae	Caryophanales	Bacilli	Bacillota	Bacillati
Salinicoccus kunmingensis	B	8	10	0.5	25	Moderate	s	p	Chen et al. 2007	2007	https://lpsn.dsmz.de/species/salinicoccus-kunmingensis	Salinicoccus	Staphylococcaceae	Caryophanales	Bacilli	Bacillota	Bacillati
Salinicoccus luteus	B	10	10	1	25	Moderate	s	p	Zhang et al 2007	2007	https://lpsn.dsmz.de/species/salinicoccus-luteus	Salinicoccus	Staphylococcaceae	Caryophanales	Bacilli	Bacillota	Bacillati
Salinicoccus siamensis	B	10	10	1.5	25	Moderate	s	p	Pakdeeto et al. 2007	2007	https://lpsn.dsmz.de/species/salinicoccus-siamensis	Salinicoccus	Staphylococcaceae	Caryophanales	Bacilli	Bacillota	Bacillati
Salinicola halophilus	B	7.5	10	3	25	Moderate	s	p	Aguilera et al 2007 / de la Haba 2010	2007	https://lpsn.dsmz.de/species/salinicola-halophilus	Salinicola	Halomonadaceae	Oceanospirillales	Gammaproteobacteria	Pseudomonadota	Pseudomonadati
Salsuginibacillus kocurii	B	10	10	3	20	Moderate	Salts	p	Carrasco et al. 2007	2007	https://lpsn.dsmz.de/species/salsuginibacillus-kocurii	Salsuginibacillus	Bacillaceae	Caryophanales	Bacilli	Bacillota	Bacillati
Halomonas gomseomensis	B	8	12	1	20	Moderate	s	p	Kim et al. 2007	2007	https://lpsn.dsmz.de/species/halomonas-gomseomensis	Halomonas	Halomonadaceae	Oceanospirillales	Gammaproteobacteria	Pseudomonadota	Pseudomonadati
Lentibacillus halodurans	B	8	12	5	30	Moderate	s	p	Yuan et al 2007	2007	https://lpsn.dsmz.de/species/lentibacillus-halodurans	Lentibacillus	Bacillaceae	Caryophanales	Bacilli	Bacillota	Bacillati
Salibacterium qingdaonense	B	12	12	2.5	20	Moderate	s	p	Wnag et al 2007 / Reddy et al 2015	2007	https://lpsn.dsmz.de/species/salibacterium-qingdaonense	Salibacterium	Bacillaceae	Caryophanales	Bacilli	Bacillota	Bacillati
Chromohalobacter japonicus	B	7.5	12.5	5	25	Moderate	s	p	Sánchez-Porro et al 2007	2007	https://lpsn.dsmz.de/species/chromohalobacter-japonicus	Chromohalobacter	Halomonadaceae	Oceanospirillales	Gammaproteobacteria	Pseudomonadota	Pseudomonadati
Alkalibacillus silvisoli	B	10	15	5	25	Moderate	s	p	Usami et al 2007	2007	https://lpsn.dsmz.de/species/alkalibacillus-silvisoli	Alkalibacillus	Bacillaceae	Caryophanales	Bacilli	Bacillota	Bacillati
Halalkalibacillus halophilus	B	10	15	5	25	Moderate	s	p	Echigo et al 2007	2007	https://lpsn.dsmz.de/species/halalkalibacillus-halophilus	Halalkalibacillus	Bacillaceae	Caryophanales	Bacilli	Bacillota	Bacillati
Halomonas gudaonensis	B	10	15	1	20	Moderate	s	p	Wang et al 2007	2007	https://lpsn.dsmz.de/species/halomonas-gudaonensis	Halomonas	Halomonadaceae	Oceanospirillales	Gammaproteobacteria	Pseudomonadota	Pseudomonadati
Halomonas janggokensis	B	10	15	1	20	Moderate	s	p	Kim et al. 2007	2007	https://lpsn.dsmz.de/species/halomonas-janggokensis	Halomonas	Halomonadaceae	Oceanospirillales	Gammaproteobacteria	Pseudomonadota	Pseudomonadati
Halomonas shengliensis	B	5	15	0	15	Moderate	s	p	Wang et al 2007	2007	https://lpsn.dsmz.de/species/halomonas-shengliensis	Halomonas	Halomonadaceae	Oceanospirillales	Gammaproteobacteria	Pseudomonadota	Pseudomonadati
Lentibacillus kapialis	B	15	15	5	30	Moderate	s	p	Pakdeeto et al 2007	2007	https://lpsn.dsmz.de/species/lentibacillus-kapialis	Lentibacillus	Bacillaceae	Caryophanales	Bacilli	Bacillota	Bacillati
Piscibacillus salipiscarius	B	10	20	2	30	Moderate	s	p	Tanasupawat et al 2007	2007	https://lpsn.dsmz.de/species/piscibacillus-salipiscarius	Piscibacillus	Bacillaceae	Caryophanales	Bacilli	Bacillota	Bacillati
Salinicola salarius	B	10	20	0	25	Moderate	s	p	Kim et al. 2007 / de la Haba et al 2010	2007	https://lpsn.dsmz.de/species/salinicola-salarius	Salinicola	Halomonadaceae	Oceanospirillales	Gammaproteobacteria	Pseudomonadota	Pseudomonadati
Alkalilimnicola ehrlichii	B	30	30	15	190	No Class	s	g	Hoeft et al 2007	2007	https://lpsn.dsmz.de/species/alkalilimnicola-ehrlichii	Alkalilimnicola	Ectothiorhodospiraceae	Chromatiales	Gammaproteobacteria	Pseudomonadota	Pseudomonadati
Petrotoga halophila	B	40	60	5	90	Moderate	s	g	Miranda-Tello et al. 2007	2007	https://lpsn.dsmz.de/species/petrotoga-halophila	Petrotoga	Petrotogaceae	Petrotogales	Thermotogae	Thermotogota	Thermotogati
Echinicola vietnamensis	B			0	15	Tolerant	s	p	Nedashkovskaya et al 2007	2007	https://lpsn.dsmz.de/species/echinicola-vietnamensis	Echinicola	Cyclobacteriaceae	Cytophagales	Cytophagia	Bacteroidota	Pseudomonadati
Halobacillus faecis	B			0	24	No Class	s	p	An et al 2007	2007	https://lpsn.dsmz.de/species/halobacillus-faecis	Halobacillus	Bacillaceae	Caryophanales	Bacilli	Bacillota	Bacillati
Marinobacterium halophilum	B			3	12	Moderate	s	p	Chang et al. 2007	2007	https://lpsn.dsmz.de/species/marinobacterium-halophilum	Marinobacterium	Alteromonadaceae	Alteromonadales	Gammaproteobacteria	Pseudomonadota	Pseudomonadati
Neobacillus pocheonensis	B			0	12	Tolerant	s	p	Ten et al 2007 / Gupta et al 2020	2007	https://lpsn.dsmz.de/species/neobacillus-pocheonensis	Neobacillus	Cytobacillaceae	Caryophanales	Bacilli	Bacillota	Bacillati
Neptuniibacter caesariensis	B			1.7	6	Slight	Marine Salts	p	Arahal et al 2007	2007	https://lpsn.dsmz.de/species/neptuniibacter-caesariensis	Neptuniibacter	Oceanospirillaceae	Oceanospirillales	Gammaproteobacteria	Pseudomonadota	Pseudomonadati
Paraglaciecola agarilytica	B			2	8	Slight	s	p	Yong et al 2007	2007	https://lpsn.dsmz.de/species/paraglaciecola-agarilytica	Paraglaciecola	Alteromonadaceae	Alteromonadales	Gammaproteobacteria	Pseudomonadota	Pseudomonadati
Reinekea blandensis	B			0.3	12	Moderate	Marine Salts	p	Pinhassi et al 2007	2007	https://lpsn.dsmz.de/species/reinekea-blandensis	Reinekea	Saccharospirillaceae	Oceanospirillales	Gammaproteobacteria	Pseudomonadota	Pseudomonadati
Virgibacillus halophilus	B			0	18	No Class	s	p	An et al 2007	2007	https://lpsn.dsmz.de/species/virgibacillus-halophilus	Virgibacillus	Bacillaceae	Caryophanales	Bacilli	Bacillota	Bacillati
Ignicoccus hospitalis	A	1.4	1.4	0.5	5	Moderate	s	p	Paper et al 2007	2007	https://lpsn.dsmz.de/species/ignicoccus-hospitalis	Ignicoccus	Desulfurococcaceae	Desulfurococcales	Thermoprotei	Thermoproteota	Thermoproteati
Haloplanus natans	A	3	3	2.6	4.3	Extreme	s	m	Bardavid et al 2007	2007	https://lpsn.dsmz.de/species/haloplanus-natans	Haloplanus	Haloferacaceae	Halobacteriales	Halobacteria	Methanobacteriota	Methanobacteriati
Haladaptatus paucihalophilus	A	2.6	3.1	0.8	5.1	Extreme	s	m	Savage et al.2007	2007	https://lpsn.dsmz.de/species/haladaptatus-paucihalophilus	Haladaptatus	Halobacteriaceae	Halobacteriales	Halobacteria	Methanobacteriota	Methanobacteriati
Haloarcula amylolytica	A	2.9	3.2	2	5.1	Extreme	s	m	Yang et al. 2007	2007	https://lpsn.dsmz.de/species/haloarcula-amylolytica	Haloarcula	Haloarculaceae	Halobacteriales	Halobacteria	Methanobacteriota	Methanobacteriati
Haloferax larsenii	A	2.2	3.4	1	4.8	Extreme	s	m	Xu et al 2007	2007	https://lpsn.dsmz.de/species/haloferax-larsenii	Haloferax	Haloferacaceae	Halobacteriales	Halobacteria	Methanobacteriota	Methanobacteriati
Halorubrum ejinorense	A	3.4	3.4	2.5	5	No Class	s	m	Castillo et al 2007	2007	https://lpsn.dsmz.de/species/halorubrum-ejinorense	Halorubrum	Haloferacaceae	Halobacteriales	Halobacteria	Methanobacteriota	Methanobacteriati
Halovivax ruber	A	3.4	3.4	2.5	5.2	Extreme	s	m	Castillo et al 2007	2007	https://lpsn.dsmz.de/species/halovivax-ruber	Halovivax	Natrialbaceae	Halobacteriales	Halobacteria	Methanobacteriota	Methanobacteriati
Natrinema hispanicum	A	3.4	3.4	2.2	4	Extreme	s	m	Romano et al 2007	2007	https://lpsn.dsmz.de/species/natrinema-hispanicum	Natrinema	Natrialbaceae	Halobacteriales	Halobacteria	Methanobacteriota	Methanobacteriati
Haloferax prahovense	A	3.5	3.5	2.5	5.2	Extreme	s	m	Enache et al 2007	2007	https://lpsn.dsmz.de/species/haloferax-prahovense	Haloferax	Haloferacaceae	Halobacteriales	Halobacteria	Methanobacteriota	Methanobacteriati
Halopiger xanaduensis	A	4.3	4.3	2.5	5	Extreme	s	m	Gutiérrez et al 2007	2007	https://lpsn.dsmz.de/species/halopiger-xanaduensis	Halopiger	Natrialbaceae	Halobacteriales	Halobacteria	Methanobacteriota	Methanobacteriati
Halococcus qingdaonensis	A	18	18	10		Extreme	s	p	Wang et al 2007	2007	https://lpsn.dsmz.de/species/halococcus-qingdaonensis	Halococcus	Halococcaceae	Halobacteriales	Halobacteria	Methanobacteriota	Methanobacteriati
Natronorubrum sulfidifaciens	A	18	18	12	28	Extreme	s	p	Cui et al 2007	2007	https://lpsn.dsmz.de/species/natronorubrum-sulfidifaciens	Natronorubrum	Natrialbaceae	Halobacteriales	Halobacteria	Methanobacteriota	Methanobacteriati
Natronococcus jeotgali	A	23	25	7.5	30	No Class	s	p	Roh et al 2007	2007	https://lpsn.dsmz.de/species/natronococcus-jeotgali	Natronococcus	Natrialbaceae	Halobacteriales	Halobacteria	Methanobacteriota	Methanobacteriati
Halococcus thailandensis	A	20	30	15	30	Extreme	s	p	Namwong et al 2007	2007	https://lpsn.dsmz.de/species/halococcus-thailandensis	Halococcus	Halococcaceae	Halobacteriales	Halobacteria	Methanobacteriota	Methanobacteriati
Haloquadratum walsbyi	A			14	36	Extreme	s	p	Burnns et al 2007	2007	https://lpsn.dsmz.de/species/haloquadratum-walsbyi	Haloquadratum	Haloferacaceae	Halobacteriales	Halobacteria	Methanobacteriota	Methanobacteriati
Halalkalicoccus jeotgali	A	15	15	10	30	Extreme	s	p	Roh et al 2007	2007	https://lpsn.dsmz.de/species/halalkalicoccus-jeotgali	Halalkalicoccus	Halalkalicoccaceae	Halobacteriales	Halobacteria	Methanobacteriota	Methanobacteriati
Anaerobacillus alkalidiazotrophicus	B	0.2	0.4	0.1	1.2	Tolerant	Na+	m	Sorokin et al 2008	2008	https://lpsn.dsmz.de/species/anaerobacillus-alkalidiazotrophicus	Anaerobacillus	Bacillaceae	Caryophanales	Bacilli	Bacillota	Bacillati
Methylomicrobium japanense	B	0.4	0.8	0.03	1.5	Slight	s	m	Kalyuzhnaya et al 2008	2008	https://lpsn.dsmz.de/species/methylomicrobium-japanense	Methylomicrobium	Methylococcaceae	Methylococcales	Gammaproteobacteria	Pseudomonadota	Pseudomonadati
Thiohalospira alkaliphila	B	2	2	0.5	4	Extreme	s	m	Yu et al 2008	2008	https://lpsn.dsmz.de/species/thiohalospira-alkaliphila	Thiohalospira	Ectothiorhodospiraceae	Chromatiales	Gammaproteobacteria	Pseudomonadota	Pseudomonadati
Halolactibacillus alkaliphilus	B	2.5	2.5	0.5	30	Moderate	s	p	Cao et al 2008	2008	https://lpsn.dsmz.de/species/halolactibacillus-alkaliphilus	Halolactibacillus	Bacillaceae	Caryophanales	Bacilli	Bacillota	Bacillati
Halomonas salifodinae	B	3	3	0.5	20	No Class	s	p	Wang et al 2008	2008	https://lpsn.dsmz.de/species/halomonas-salifodinae	Halomonas	Halomonadaceae	Oceanospirillales	Gammaproteobacteria	Pseudomonadota	Pseudomonadati
Halopseudomonas xiamenensis	B	1	3	0	8	Moderate	s	p	Lai and Shao 2008 / Rudra and Gupta 2021	2008	https://lpsn.dsmz.de/species/halopseudomonas-xiamenensis	Halopseudomonas	Pseudomonadaceae	Pseudomonadales	Gammaproteobacteria	Pseudomonadota	Pseudomonadati
Marinobacter zhejiangensis	B	1	3	0.5	10	No Class	s	p	Huo et al 2008	2008	https://lpsn.dsmz.de/species/marinobacter-zhejiangensis	Marinobacter	Alteromonadaceae	Alteromonadales	Gammaproteobacteria	Pseudomonadota	Pseudomonadati
Nosocomiicoccus ampullae	B	1	3	0	14	Moderate	s	p	Alves et al 2008	2008	https://lpsn.dsmz.de/species/nosocomiicoccus-ampullae	Nosocomiicoccus	Staphylococcaceae	Caryophanales	Bacilli	Bacillota	Bacillati
Salinimicrobium terrae	B	1	3	0.5	8	Slight	s	p	Chen et al 2008	2008	https://lpsn.dsmz.de/species/salinimicrobium-terrae	Salinimicrobium	Flavobacteriaceae	Flavobacteriales	Flavobacteriia	Bacteroidota	Pseudomonadati
Salinimicrobium xinjiangense	B	2	3	0.5	10	Moderate	s	p	Lim et al 2008	2008	https://lpsn.dsmz.de/species/salinimicrobium-xinjiangense	Salinimicrobium	Flavobacteriaceae	Flavobacteriales	Flavobacteriia	Bacteroidota	Pseudomonadati
Simiduia agarivorans	B	2	3	0.5	7	No Class	s	p	Shieh et al 2008	2008	https://lpsn.dsmz.de/species/simiduia-agarivorans	Simiduia	Cellvibrionaceae	Cellvibrionales	Gammaproteobacteria	Pseudomonadota	Pseudomonadati
Spongiibacter marinus	B	3	3	1	7	No Class	s	p	Greaeber et al 2008	2008	https://lpsn.dsmz.de/species/spongiibacter-marinus	Spongiibacter	Spongiibacteraceae	Cellvibrionales	Gammaproteobacteria	Pseudomonadota	Pseudomonadati
Thiohalorhabdus denitrificans	B	3	3	1.5	4	Extreme	s	m	Sorokin et al 2008	2008	https://lpsn.dsmz.de/species/thiohalorhabdus-denitrificans	Thiohalorhabdus	Thiohalorhabdaceae	Thiohalorhabdales	Gammaproteobacteria	Pseudomonadota	Pseudomonadati
Thiohalospira halophila	B	2.5	3	2	5	Extreme	s	m	Yu et al 2008	2008	https://lpsn.dsmz.de/species/thiohalospira-halophila	Thiohalospira	Ectothiorhodospiraceae	Chromatiales	Gammaproteobacteria	Pseudomonadota	Pseudomonadati
Amorphus coralli	B	3	4	0	4	Tolerant	s	p	Yosef et al 2008	2008	https://lpsn.dsmz.de/species/amorphus-coralli	Amorphus	Acuticoccaceae	Hyphomicrobiales	Alphaproteobacteria	Pseudomonadota	Pseudomonadati
Albimonas donghaensis	B	2	5	0	14	Moderate	s	p	Lim et al 2008	2008	https://lpsn.dsmz.de/species/albimonas-donghaensis	Albimonas	Paracoccaceae	Rhodobacterales	Alphaproteobacteria	Pseudomonadota	Pseudomonadati
Bacillus coahuilensis	B	5	5	0.5	10	Moderate	s	p	Cerritos et al 2008	2008	https://lpsn.dsmz.de/species/bacillus-coahuilensis	Bacillus	Bacillaceae	Caryophanales	Bacilli	Bacillota	Bacillati
Evansella polygoni	B	5	5	3	14	Moderate	s	p	Aino et al 2008 / Gupta et al 2020	2008	https://lpsn.dsmz.de/species/evansella-polygoni	Evansella	Bacillaceae	Caryophanales	Bacilli	Bacillota	Bacillati
Halomonas caseinilytica	B	3	5	0.5	15	Moderate	s	p	Wu et al. 2008	2008	https://lpsn.dsmz.de/species/halomonas-caseinilytica	Halomonas	Halomonadaceae	Oceanospirillales	Gammaproteobacteria	Pseudomonadota	Pseudomonadati
Marinobacter mobilis	B	3	5	0.5	10	Moderate	s	p	Huo et al 2008	2008	https://lpsn.dsmz.de/species/marinobacter-mobilis	Marinobacter	Alteromonadaceae	Alteromonadales	Gammaproteobacteria	Pseudomonadota	Pseudomonadati
Marinobacter pelagius	B	5	5	0.5	15	Moderate	s	p	Xu et al. 2008	2008	https://lpsn.dsmz.de/species/marinobacter-pelagius	Marinobacter	Alteromonadaceae	Alteromonadales	Gammaproteobacteria	Pseudomonadota	Pseudomonadati
Oceanobacillus caeni	B	2	5	0	10	Moderate	s	p	Nam et al 2008	2008	https://lpsn.dsmz.de/species/oceanobacillus-caeni	Oceanobacillus	Bacillaceae	Caryophanales	Bacilli	Bacillota	Bacillati
Salinivibrio proteolyticus	B	5	5	1	17	Moderate	s	p	Amoozegar et al 2008	2008	https://lpsn.dsmz.de/species/salinivibrio-proteolyticus	Salinivibrio	Vibrionaceae	Vibrionales	Gammaproteobacteria	Pseudomonadota	Pseudomonadati
Streptomonospora arabica	B	5	5	0	15	Tolerant	s	p	Hozzein and Goodfellow 2008	2008	https://lpsn.dsmz.de/species/streptomonospora-arabica	Streptomonospora	Nocardiopsidaceae	Streptosporangiales	Actinomycetes	Actinomycetota	Bacillati
Bacillus isabeliae	B	4	6	1	14	No Class	s	p	Albuquerque et al 2008	2008	https://lpsn.dsmz.de/species/bacillus-isabeliae	Bacillus	Bacillaceae	Caryophanales	Bacilli	Bacillota	Bacillati
Alteribacter aurantiacus	B	3	7	0	15	Moderate	s	p	Borsodi et al 2008 / Gupta et al 2020	2008	https://lpsn.dsmz.de/species/alteribacter-aurantiacus	Alteribacter	Bacillaceae	Caryophanales	Bacilli	Bacillota	Bacillati
Gracilibacillus lacisalsi	B	5	7	1	18	No Class	s	p	Jeon et al 2008	2008	https://lpsn.dsmz.de/species/gracilibacillus-lacisalsi	Gracilibacillus	Bacillaceae	Caryophanales	Bacilli	Bacillota	Bacillati
Halomonas nitroreducens	B	5	7.5	3	20	Moderate	s	p	González-Domenech et al 2008	2008	https://lpsn.dsmz.de/species/halomonas-nitroreducens	Halomonas	Halomonadaceae	Oceanospirillales	Gammaproteobacteria	Pseudomonadota	Pseudomonadati
Halomonas sabkhae	B	7.5	7.5	5	25	Moderate	s	p	Kharroub et al 2008	2008	https://lpsn.dsmz.de/species/halomonas-sabkhae	Halomonas	Halomonadaceae	Oceanospirillales	Gammaproteobacteria	Pseudomonadota	Pseudomonadati
Sediminibacillus halophilus	B	5	7.5	0	20	Moderate	s	p	Carrasco et al. 2008	2008	https://lpsn.dsmz.de/species/sediminibacillus-halophilus	Sediminibacillus	Bacillaceae	Caryophanales	Bacilli	Bacillota	Bacillati
Halobacillus seohaensis	B	8	8	1	21	Moderate	s	p	Yoon et al 2008	2008	https://lpsn.dsmz.de/species/halobacillus-seohaensis	Halobacillus	Bacillaceae	Caryophanales	Bacilli	Bacillota	Bacillati
Salinicoccus halodurans	B	8	8	0	24	Moderate	s	p	Wang et al 2008	2008	https://lpsn.dsmz.de/species/salinicoccus-halodurans	Salinicoccus	Staphylococcaceae	Caryophanales	Bacilli	Bacillota	Bacillati
Aquisalibacillus elongatus	B	10	10	3	20	Moderate	s	p	Marquez et al 2008	2008	https://lpsn.dsmz.de/species/aquisalibacillus-elongatus	Aquisalibacillus	Bacillaceae	Caryophanales	Bacilli	Bacillota	Bacillati
Halobacillus alkaliphilus	B	10	10	0.5	20	No Class	s	p	Romano et al 2008	2008	https://lpsn.dsmz.de/species/halobacillus-alkaliphilus	Halobacillus	Bacillaceae	Caryophanales	Bacilli	Bacillota	Bacillati
Halobacillus mangrovi	B	10	10	5	20	Moderate	s	p	Soto-Ramírez et al 2008	2008	https://lpsn.dsmz.de/species/halobacillus-mangrovi	Halobacillus	Bacillaceae	Caryophanales	Bacilli	Bacillota	Bacillati
Halomonas cerina	B	7.5	10	5	20	Moderate	s	p	González-Domenech et al 2008	2008	https://lpsn.dsmz.de/species/halomonas-cerina	Halomonas	Halomonadaceae	Oceanospirillales	Gammaproteobacteria	Pseudomonadota	Pseudomonadati
Halomonas korlensis	B	6	10	0.5	25	Moderate	s	p	Li et al 2008	2008	https://lpsn.dsmz.de/species/halomonas-korlensis	Halomonas	Halomonadaceae	Oceanospirillales	Gammaproteobacteria	Pseudomonadota	Pseudomonadati
Halomonas lutea	B	5	10	1	20	Moderate	s	p	Wang et al 2008	2008	https://lpsn.dsmz.de/species/halomonas-lutea	Halomonas	Halomonadaceae	Oceanospirillales	Gammaproteobacteria	Pseudomonadota	Pseudomonadati
Lentibacillus salis	B	10	10	5	15	Moderate	s	p	Lee et al 2008	2008	https://lpsn.dsmz.de/species/lentibacillus-salis	Lentibacillus	Bacillaceae	Caryophanales	Bacilli	Bacillota	Bacillati
Microbulbifer halophilus	B	10	10	1	20	Moderate	s	p	Tang et al 2008	2008	https://lpsn.dsmz.de/species/microbulbifer-halophilus	Microbulbifer	Microbulbiferaceae	Cellvibrionales	Gammaproteobacteria	Pseudomonadota	Pseudomonadati
Nesterenkonia halophila	B	10	10	0.5	30	Moderate	s	p	Li et al 2008	2008	https://lpsn.dsmz.de/species/nesterenkonia-halophila	Nesterenkonia	Micrococcaceae	Micrococcales	Actinomycetes	Actinomycetota	Bacillati
Saccharomonospora saliphila	B	10	10	0	20	Moderate	s	p	Syed et al 2008	2008	https://lpsn.dsmz.de/species/saccharomonospora-saliphila	Saccharomonospora	Pseudonocardiaceae	Pseudonocardiales	Actinomycetes	Actinomycetota	Bacillati
Salinicoccus iranensis	B	7.5	10	1	25	Moderate	s	p	Amoozegar et al 2008	2008	https://lpsn.dsmz.de/species/salinicoccus-iranensis	Salinicoccus	Staphylococcaceae	Caryophanales	Bacilli	Bacillota	Bacillati
Streptomonospora halophila	B	10	10	5	20	No Class	s	p	Cai et al 2008	2008	https://lpsn.dsmz.de/species/streptomonospora-halophila	Streptomonospora	Nocardiopsidaceae	Streptosporangiales	Actinomycetes	Actinomycetota	Bacillati
Virgibacillus chiguensis	B	5	10	0	30	No Class	s	p	Wang et al 2008	2008	https://lpsn.dsmz.de/species/virgibacillus-chiguensis	Virgibacillus	Bacillaceae	Caryophanales	Bacilli	Bacillota	Bacillati
Virgibacillus kekensis	B	10	10	0	25	Moderate	s	p	Chen et al. 2008	2008	https://lpsn.dsmz.de/species/virgibacillus-kekensis	Virgibacillus	Bacillaceae	Caryophanales	Bacilli	Bacillota	Bacillati
Virgibacillus salarius	B	7	10	0.5	25	Moderate	s	p	Hua et al 2008	2008	https://lpsn.dsmz.de/species/virgibacillus-salarius	Virgibacillus	Bacillaceae	Caryophanales	Bacilli	Bacillota	Bacillati
Alkalibacterium indicireducens	B	1	11	0	14	Tolerant	s	p	Yumoto et al. 2008	2008	https://lpsn.dsmz.de/species/alkalibacterium-indicireducens	Alkalibacterium	Carnobacteriaceae	Lactobacillales	Bacilli	Bacillota	Bacillati
Lentibacillus salinarum	B	10	12	3	24	Moderate	s	p	Lee et al 2008	2008	https://lpsn.dsmz.de/species/lentibacillus-salinarum	Lentibacillus	Bacillaceae	Caryophanales	Bacilli	Bacillota	Bacillati
Salibacterium aidingense	B	12	12	8	33	Moderate	s	p	Xue et al 2008	2008	https://lpsn.dsmz.de/species/salibacterium-aidingense	Salibacterium	Bacillaceae	Caryophanales	Bacilli	Bacillota	Bacillati
Gracilibacillus halophilus	B	15	15	7	30	Moderate	s	p	Chen et al. 2008	2008	https://lpsn.dsmz.de/species/gracilibacillus-halophilus	Gracilibacillus	Bacillaceae	Caryophanales	Bacilli	Bacillota	Bacillati
Haloactinospora alba	B	15	15	9	21	Moderate	s	p	Tang et al 2008	2008	https://lpsn.dsmz.de/species/haloactinospora-alba	Haloactinospora	Nocardiopsidaceae	Streptosporangiales	Actinomycetes	Actinomycetota	Bacillati
Clostridiisalibacter paucivorans	B	50	50	10	100	Moderate	s	g	Liebgott et al 2008	2008	https://lpsn.dsmz.de/species/clostridiisalibacter-paucivorans	Clostridiisalibacter	Clostridiaceae	Eubacteriales	Clostridia	Bacillota	Bacillati
Alteromonas genovensis	B			2	15	Moderate	s	p	Vandecandelaere et al 2008	2008	https://lpsn.dsmz.de/species/alteromonas-genovensis	Alteromonas	Alteromonadaceae	Alteromonadales	Gammaproteobacteria	Pseudomonadota	Pseudomonadati
Marinobacter guineae	B			1	15	Moderate	s	p	Montes et al 2008	2008	https://lpsn.dsmz.de/species/marinobacter-guineae	Marinobacter	Alteromonadaceae	Alteromonadales	Gammaproteobacteria	Pseudomonadota	Pseudomonadati
Marinobacter psychrophilus	B			2	8	No Class	s	p	Zhang et al 2008	2008	https://lpsn.dsmz.de/species/marinobacter-psychrophilus	Marinobacter	Alteromonadaceae	Alteromonadales	Gammaproteobacteria	Pseudomonadota	Pseudomonadati
Marinomonas communis	B			1	7	Slight	s	p	Chang et al 2008	2008	https://lpsn.dsmz.de/species/marinomonas-communis	Marinomonas	Oceanospirillaceae	Oceanospirillales	Gammaproteobacteria	Pseudomonadota	Pseudomonadati
Methylotuvimicrobium alcaliphilum	B			0	1.5	Tolerant	s	m	Kalyuzhnaya et al 2008	2008	https://lpsn.dsmz.de/species/methylotuvimicrobium-alcaliphilum	Methylotuvimicrobium	Incertae sedis	Methylococcales	Gammaproteobacteria	Pseudomonadota	Pseudomonadati
Methylotuvimicrobium kenyense	B			0	1.1	No Class	Na+	m	Kalyuzhnaya et al 2008	2008	https://lpsn.dsmz.de/species/methylotuvimicrobium-kenyense	Methylotuvimicrobium	Incertae sedis	Methylococcales	Gammaproteobacteria	Pseudomonadota	Pseudomonadati
Halogeometricum pallidum	A	3.1	3.1	1.3	4.3	Extreme	s	m	Savage et al 2008 / Qiu et al 2013	2008	https://lpsn.dsmz.de/species/halogeometricum-pallidum	Halogeometricum	Haloferacaceae	Halobacteriales	Halobacteria	Methanobacteriota	Methanobacteriati
Haloferax elongans	A	2.6	3.4	1.7	5.1	Extreme	s	m	Allen et al 2008	2008	https://lpsn.dsmz.de/species/haloferax-elongans	Haloferax	Haloferacaceae	Halobacteriales	Halobacteria	Methanobacteriota	Methanobacteriati
Haloferax mucosum	A	2.6	3.4	1.7	5.1	Extreme	s	m	Allen et al 2008	2008	https://lpsn.dsmz.de/species/haloferax-mucosum	Haloferax	Haloferacaceae	Halobacteriales	Halobacteria	Methanobacteriota	Methanobacteriati
Halorubrum kocurii	A	3.4	3.4	2.5	5	Extreme	s	m	Gutiérrez et al 2008	2008	https://lpsn.dsmz.de/species/halorubrum-kocurii	Halorubrum	Haloferacaceae	Halobacteriales	Halobacteria	Methanobacteriota	Methanobacteriati
Haloterrigena salina	A	3.4	3.4	2.5	5	Extreme	s	m	Gutiérrez et al 2008	2008	https://lpsn.dsmz.de/species/haloterrigena-salina	Haloterrigena	Natrialbaceae	Halobacteriales	Halobacteria	Methanobacteriota	Methanobacteriati
Natrinema gari	A	2.6	3.4	1.7	5.1	Extreme	s	m	Tapingkae et al 2008	2008	https://lpsn.dsmz.de/species/natrinema-gari	Natrinema	Natrialbaceae	Halobacteriales	Halobacteria	Methanobacteriota	Methanobacteriati
Halobacterium salinarum	A	3.4	4.3	2.6	5.1	Extreme	s	m	Yachai et al 2008	2008	https://lpsn.dsmz.de/species/halobacterium-salinarum	Halobacterium	Halobacteriaceae	Halobacteriales	Halobacteria	Methanobacteriota	Methanobacteriati
Halorubrum luteum	A	4	4.3	2.5	5.2	No Class	s	m	Hu et al 2008	2008	https://lpsn.dsmz.de/species/halorubrum-luteum	Halorubrum	Haloferacaceae	Halobacteriales	Halobacteria	Methanobacteriota	Methanobacteriati
Halorubrum californiense	A	3.5	4.5	2.5	5	Extreme	s	m	Pesenti et al 2008	2008	https://lpsn.dsmz.de/species/halorubrum-californiense	Halorubrum	Haloferacaceae	Halobacteriales	Halobacteria	Methanobacteriota	Methanobacteriati
Halorhabdus tiamatea	A	27	27	10	30	Extreme	s	p	Antunes et al 2008	2008	https://lpsn.dsmz.de/species/halorhabdus-tiamatea	Halorhabdus	Haloarculaceae	Halobacteriales	Halobacteria	Methanobacteriota	Methanobacteriati
Lysinibacillus parviboronicapiens	B	0	0	0	6	Tolerant	s	p	Miwa et al 2009	2009	https://lpsn.dsmz.de/species/lysinibacillus-parviboronicapiens	Lysinibacillus	Caryophanaceae	Caryophanales	Bacilli	Bacillota	Bacillati
Alkalibacterium pelagium	B	0.5	1.5	0	17	Slight	s	p	Ishikawa et al 2009	2009	https://lpsn.dsmz.de/species/alkalibacterium-pelagium	Alkalibacterium	Carnobacteriaceae	Lactobacillales	Bacilli	Bacillota	Bacillati
Lishizhenia tianjinensis	B	2	2	0.5	6.5	Moderate	s	p	Chen et al 2009	2009	https://lpsn.dsmz.de/species/lishizhenia-tianjinensis	Lishizhenia	Crocinitomicaceae	Flavobacteriales	Flavobacteriia	Bacteroidota	Pseudomonadati
Marinospirillum celere	B	2	2	0.5	12	No Class	s	p	Namsaraev et al 2009	2009	https://lpsn.dsmz.de/species/marinospirillum-celere	Marinospirillum	Oceanospirillaceae	Oceanospirillales	Gammaproteobacteria	Pseudomonadota	Pseudomonadati
Microbulbifer epialgicus	B	2	2	0.5	6.5	Slight	s	p	Nishijima et al 2009	2009	https://lpsn.dsmz.de/species/microbulbifer-epialgicus	Microbulbifer	Microbulbiferaceae	Cellvibrionales	Gammaproteobacteria	Pseudomonadota	Pseudomonadati
Microbulbifer variabilis	B	2	2	0.5	7	Slight	s	p	Nishijima et al 2009	2009	https://lpsn.dsmz.de/species/microbulbifer-variabilis	Microbulbifer	Microbulbiferaceae	Cellvibrionales	Gammaproteobacteria	Pseudomonadota	Pseudomonadati
Psychrilyobacter atlanticus	B	2	2			Slight	s	p	Zhao et al 2009	2009	https://lpsn.dsmz.de/species/psychrilyobacter-atlanticus	Psychrilyobacter	Fusobacteriaceae	Fusobacteriales	Fusobacteriia	Fusobacteriota	Fusobacteriati
Robertmurraya korlensis	B	0	2	0	8	Tolerant	s	p	Zhang et al 2009 / Gupta et al 2020	2009	https://lpsn.dsmz.de/species/robertmurraya-korlensis	Robertmurraya	Cytobacillaceae	Caryophanales	Bacilli	Bacillota	Bacillati
Natranaerobius trueperi	B	2.2	2.2	1.5	3.8	No Class	s	m	Mesbah and Wiegal 2009	2009	https://lpsn.dsmz.de/species/natranaerobius-trueperi	Natranaerobius	Natranaerobiaceae	Natranaerobiales	Clostridia	Bacillota	Bacillati
Natronovirga wadinatrunensis	B	2.3	2.3	1.7	3.7	Extreme	s	m	Mesbah and Wiegal 2009	2009	https://lpsn.dsmz.de/species/natronovirga-wadinatrunensis	Natronovirga	Natranaerobiaceae	Natranaerobiales	Clostridia	Bacillota	Bacillati
Alkalibacterium kapii	B	1.5	2.5	0	21	Slight	s	p	Ishikawa et al 2009	2009	https://lpsn.dsmz.de/species/alkalibacterium-kapii	Alkalibacterium	Carnobacteriaceae	Lactobacillales	Bacilli	Bacillota	Bacillati
Alkalibacterium thalassium	B	1	2.5	0	11	Slight	s	p	Ishikawa et al 2009	2009	https://lpsn.dsmz.de/species/alkalibacterium-thalassium	Alkalibacterium	Carnobacteriaceae	Lactobacillales	Bacilli	Bacillota	Bacillati
Salinisphaera hydrothermalis	B	2.5	2.5	1	25	Tolerant	s	p	Crespo-Medina et al 2009	2009	https://lpsn.dsmz.de/species/salinisphaera-hydrothermalis	Salinisphaera	Salinisphaeraceae	Nevskiales	Gammaproteobacteria	Pseudomonadota	Pseudomonadati
Aliagarivorans marinus	B	2	3	1	7	No Class	s	p	Jean et al 2009	2009	https://lpsn.dsmz.de/species/aliagarivorans-marinus	Aliagarivorans	Alteromonadaceae	Alteromonadales	Gammaproteobacteria	Pseudomonadota	Pseudomonadati
Aliagarivorans taiwanensis	B	2	3	1	7	No Class	s	p	Jean et al 2009	2009	https://lpsn.dsmz.de/species/aliagarivorans-taiwanensis	Aliagarivorans	Alteromonadaceae	Alteromonadales	Gammaproteobacteria	Pseudomonadota	Pseudomonadati
Kiloniella laminariae	B	3	3			Tolerant	s	p	Wiese et al 2009	2009	https://lpsn.dsmz.de/species/kiloniella-laminariae	Kiloniella	Kiloniellaceae	Rhodospirillales	Alphaproteobacteria	Pseudomonadota	Pseudomonadati
Lacticigenium naphthae	B	3	3	0	17	Tolerant	s	p	Iino et al 2009	2009	https://lpsn.dsmz.de/species/lacticigenium-naphthae	Lacticigenium	Carnobacteriaceae	Lactobacillales	Bacilli	Bacillota	Bacillati
Phaeobacter italicus	B	2	3	1	7	Moderate	s	p	Vandecandelaere et al 2009	2009	https://lpsn.dsmz.de/species/phaeobacter-italicus	Phaeobacter	Roseobacteraceae	Rhodobacterales	Alphaproteobacteria	Pseudomonadota	Pseudomonadati
Psychroflexus sediminis	B	2	3	0.5	6	Slight	s	p	Chen et al 2009	2009	https://lpsn.dsmz.de/species/psychroflexus-sediminis	Psychroflexus	Flavobacteriaceae	Flavobacteriales	Flavobacteriia	Bacteroidota	Pseudomonadati
Alkalibacterium putridalgicola	B	2	4	0	20	Slight	s	p	Ishikawa et al 2009	2009	https://lpsn.dsmz.de/species/alkalibacterium-putridalgicola	Alkalibacterium	Carnobacteriaceae	Lactobacillales	Bacilli	Bacillota	Bacillati
Lutimaribacter pacificus	B	1	4	0.5	10	Moderate	s	p	Yuan et al 2009	2009	https://lpsn.dsmz.de/species/lutimaribacter-pacificus	Lutimaribacter	Roseobacteraceae	Rhodobacterales	Alphaproteobacteria	Pseudomonadota	Pseudomonadati
Salipaludibacillus neizhouensis	B	2	4	0.5	10	Slight	Total salts	p	Chen et al 2009	2009	https://lpsn.dsmz.de/species/salipaludibacillus-neizhouensis	Salipaludibacillus	Bacillaceae	Caryophanales	Bacilli	Bacillota	Bacillati
Halomonas zhanjiangensis	B	3	5	1	20	Slight	Total salts	p	Chen et al 2009	2009	https://lpsn.dsmz.de/species/halomonas-zhanjiangensis	Halomonas	Halomonadaceae	Oceanospirillales	Gammaproteobacteria	Pseudomonadota	Pseudomonadati
Marinobacter szutsaonensis	B	5	5	0	20	No Class	s	p	Wang et al 2009	2009	https://lpsn.dsmz.de/species/marinobacter-szutsaonensis	Marinobacter	Alteromonadaceae	Alteromonadales	Gammaproteobacteria	Pseudomonadota	Pseudomonadati
Paraliobacillus quinghaiensis	B	5	5	1	20	Moderate	s	p	Chen et al 2009	2009	https://lpsn.dsmz.de/species/paraliobacillus-quinghaiensis	Paraliobacillus	Bacillaceae	Caryophanales	Bacilli	Bacillota	Bacillati
Saccharospirillum salsuginis	B	5	5	1	15	Moderate	s	p	Chen et al 2009	2009	https://lpsn.dsmz.de/species/saccharospirillum-salsuginis	Saccharospirillum	Saccharospirillaceae	Oceanospirillales	Gammaproteobacteria	Pseudomonadota	Pseudomonadati
Virgibacillus arcticus	B	5	5	0	20	Moderate	s	p	Niederberger et al 2009	2009	https://lpsn.dsmz.de/species/virgibacillus-arcticus	Virgibacillus	Bacillaceae	Caryophanales	Bacilli	Bacillota	Bacillati
Zhihengliuella alba	B	5	5	0	15	Tolerant	s	p	Tang et al 2009	2009	https://lpsn.dsmz.de/species/zhihengliuella-alba	Zhihengliuella	Micrococcaceae	Micrococcales	Actinomycetes	Actinomycetota	Bacillati
Oceanibaculum indicum	B	0.5	7	0	9	Moderate	s	p	Lai et al 2009	2009	https://lpsn.dsmz.de/species/oceanibaculum-indicum	Oceanibaculum	Thalassobaculaceae	Rhodospirillales	Alphaproteobacteria	Pseudomonadota	Pseudomonadati
Sediminibacillus albus	B	7	7	0	22	Moderate	s	p	Wang et al 2009	2009	https://lpsn.dsmz.de/species/sediminibacillus-albus	Sediminibacillus	Bacillaceae	Caryophanales	Bacilli	Bacillota	Bacillati
Halomonas fontilapidosi	B	5	7.5	3	20	Moderate	s	p	González-Domenech et al 2009	2009	https://lpsn.dsmz.de/species/halomonas-fontilapidosi	Halomonas	Halomonadaceae	Oceanospirillales	Gammaproteobacteria	Pseudomonadota	Pseudomonadati
Marinobacter lacisalsi	B	7.5	7.5	3	15	Moderate	s	p	Aguilera et al 2009	2009	https://lpsn.dsmz.de/species/marinobacter-lacisalsi	Marinobacter	Alteromonadaceae	Alteromonadales	Gammaproteobacteria	Pseudomonadota	Pseudomonadati
Alcanivorax hongdengensis	B	3	8	0.5	15	Moderate	s	p	Wu et al 2009	2009	https://lpsn.dsmz.de/species/alcanivorax-hongdengensis	Alcanivorax	Alcanivoracaceae	Oceanospirillales	Gammaproteobacteria	Pseudomonadota	Pseudomonadati
Paracoccus saliphilus	B	8	8	1	15	Moderate	s	p	Wang et al 2009	2009	https://lpsn.dsmz.de/species/paracoccus-saliphilus	Paracoccus	Paracoccaceae	Rhodobacterales	Alphaproteobacteria	Pseudomonadota	Pseudomonadati
Thalassobacillus cyri	B	8	8	1	15	Moderate	s	p	Sanchez-Porro et al 2009	2009	https://lpsn.dsmz.de/species/thalassobacillus-cyri	Thalassobacillus	Bacillaceae	Caryophanales	Bacilli	Bacillota	Bacillati
Aidingimonas halophila	B	5	10	1	25	Moderate	s	p	Wang et al. 2009	2009	https://lpsn.dsmz.de/species/aidingimonas-halophila	Aidingimonas	Halomonadaceae	Oceanospirillales	Gammaproteobacteria	Pseudomonadota	Pseudomonadati
Alteribacillus persepolensis	B	10	10	5	20	Moderate	s	p	Amoozegar et al 2009 / Didari et al 2012	2009	https://lpsn.dsmz.de/species/alteribacillus-persepolensis	Alteribacillus	Bacillaceae	Caryophanales	Bacilli	Bacillota	Bacillati
Halobacillus salsuginis	B	5	10	1	23	Moderate	s	p	Chen et al 2009	2009	https://lpsn.dsmz.de/species/halobacillus-salsuginis	Halobacillus	Bacillaceae	Caryophanales	Bacilli	Bacillota	Bacillati
Halomonas ilicicola	B	10	10	2	17.5	Moderate	s	p	Arenas et al 2009	2009	https://lpsn.dsmz.de/species/halomonas-ilicicola	Halomonas	Halomonadaceae	Oceanospirillales	Gammaproteobacteria	Pseudomonadota	Pseudomonadati
Jeotgalicoccus marinus	B	5	10	0.5	25	Moderate	Total salts	p	Chen et al 2009	2009	https://lpsn.dsmz.de/species/jeotgalicoccus-marinus	Jeotgalicoccus	Staphylococcaceae	Caryophanales	Bacilli	Bacillota	Bacillati
Kushneria aurantia	B	10	10	5	17.5	Moderate	s	p	Sánchez-Porro et al 2009	2009	https://lpsn.dsmz.de/species/kushneria-aurantia	Kushneria	Halomonadaceae	Oceanospirillales	Gammaproteobacteria	Pseudomonadota	Pseudomonadati
Marinobacter santoriniensis	B	5	10	0.5	16	Moderate	s	p	Handley et al 2009	2009	https://lpsn.dsmz.de/species/marinobacter-santoriniensis	Marinobacter	Alteromonadaceae	Alteromonadales	Gammaproteobacteria	Pseudomonadota	Pseudomonadati
Piscibacillus halophilus	B	10	10	1	20	Moderate	s	p	Amoozegar et al 2009	2009	https://lpsn.dsmz.de/species/piscibacillus-halophilus	Piscibacillus	Bacillaceae	Caryophanales	Bacilli	Bacillota	Bacillati
Pontibacillus halophilus	B	5	10	2	25	Moderate	Total salts	p	Chen et al 2009	2009	https://lpsn.dsmz.de/species/pontibacillus-halophilus	Pontibacillus	Bacillaceae	Caryophanales	Bacilli	Bacillota	Bacillati
Prauserella aidingensis	B	8	10	5	15	Moderate	s	p	Li et al 2009	2009	https://lpsn.dsmz.de/species/prauserella-aidingensis	Prauserella	Pseudonocardiaceae	Pseudonocardiales	Actinomycetes	Actinomycetota	Bacillati
Prauserella salsuginis	B	8	10	5	20	Moderate	s	p	Li et al 2009	2009	https://lpsn.dsmz.de/species/prauserella-salsuginis	Prauserella	Pseudonocardiaceae	Pseudonocardiales	Actinomycetes	Actinomycetota	Bacillati
Salinicoccus albus	B	10	10	1	30	Moderate	s	p	Chen et al 2009	2009	https://lpsn.dsmz.de/species/salinicoccus-albus	Salinicoccus	Staphylococcaceae	Caryophanales	Bacilli	Bacillota	Bacillati
Salinivibrio siamensis	B	9	10	1	22	Moderate	s	p	Chamroensaksri et al 2009	2009	https://lpsn.dsmz.de/species/salinivibrio-siamensis	Salinivibrio	Vibrionaceae	Vibrionales	Gammaproteobacteria	Pseudomonadota	Pseudomonadati
Salisaeta longa	B	10	10	5	20	No Class	s	p	Vaisman and Oren 2009	2009	https://lpsn.dsmz.de/species/salisaeta-longa	Salisaeta	Salisaetaceae	Rhodothermales	Rhodothermia	Rhodothermota	Pseudomonadati
Sediminimonas qiaohouensis	B	1.5	10	0.25	20	Slight	s	p	Wang et al 2009	2009	https://lpsn.dsmz.de/species/sediminimonas-qiaohouensis	Sediminimonas	Roseobacteraceae	Rhodobacterales	Alphaproteobacteria	Pseudomonadota	Pseudomonadati
Streptomonospora amylolytica	B	10	10	5	20	No Class	s	p	Cai et al 2009	2009	https://lpsn.dsmz.de/species/streptomonospora-amylolytica	Streptomonospora	Nocardiopsidaceae	Streptosporangiales	Actinomycetes	Actinomycetota	Bacillati
Streptomonospora flavalba	B	10	10	5	25	No Class	s	p	Cai et al 2009	2009	https://lpsn.dsmz.de/species/streptomonospora-flavalba	Streptomonospora	Nocardiopsidaceae	Streptosporangiales	Actinomycetes	Actinomycetota	Bacillati
Virgibacillus salinus	B	10	10	3	20	Moderate	Total salts	p	Carrasco et al 2009	2009	https://lpsn.dsmz.de/species/virgibacillus-salinus	Virgibacillus	Bacillaceae	Caryophanales	Bacilli	Bacillota	Bacillati
Virgibacillus sediminis	B	5	10	1	20	Moderate	Total salts	p	Chen et al. 2009	2009	https://lpsn.dsmz.de/species/virgibacillus-sediminis	Virgibacillus	Bacillaceae	Caryophanales	Bacilli	Bacillota	Bacillati
Haloglycomyces albus	B	8	12	3	18	No Class	s	p	Guan et al 2009	2009	https://lpsn.dsmz.de/species/haloglycomyces-albus	Haloglycomyces	Glycomycetaceae	Glycomycetales	Actinomycetes	Actinomycetota	Bacillati
Oceanobacillus kapialis	B	6	14	0.5	24	Moderate	s	p	Namwong et al 2009	2009	https://lpsn.dsmz.de/species/oceanobacillus-kapialis	Oceanobacillus	Bacillaceae	Caryophanales	Bacilli	Bacillota	Bacillati
Gracilibacillus saliphilus	B	10	15	1	22	Moderate	s	p	Tang et al. 2009	2009	https://lpsn.dsmz.de/species/gracilibacillus-saliphilus	Gracilibacillus	Bacillaceae	Caryophanales	Bacilli	Bacillota	Bacillati
Marinococcus luteus	B	10	15	0	25	Tolerant	s	p	Wang et al 2009	2009	https://lpsn.dsmz.de/species/marinococcus-luteus	Marinococcus	Bacillaceae	Caryophanales	Bacilli	Bacillota	Bacillati
Saccharopolyspora halophila	B	10	15	3	20	Moderate	s	p	Tang et al 2009	2009	https://lpsn.dsmz.de/species/saccharopolyspora-halophila	Saccharopolyspora	Pseudonocardiaceae	Pseudonocardiales	Actinomycetes	Actinomycetota	Bacillati
Saccharopolyspora qijiaojingensis	B	10	15	6	22	Moderate	s	p	Tang et al 2009	2009	https://lpsn.dsmz.de/species/saccharopolyspora-qijiaojingensis	Saccharopolyspora	Pseudonocardiaceae	Pseudonocardiales	Actinomycetes	Actinomycetota	Bacillati
Pseudodesulfovibrio tunisiensis	B	40	40	0	70	Tolerant	s	g	Gam et al 2009 / Waite et al 2020	2009	https://lpsn.dsmz.de/species/pseudodesulfovibrio-tunisiensis	Pseudodesulfovibrio	Desulfovibrionaceae	Desulfovibrionales	Deltaproteobacteria	Pseudomonadota	Pseudomonadati
Ectothiorhodospira variabilis	B	50	80	20	200	Moderate	s	g	Gorlenko et al 2009	2009	https://lpsn.dsmz.de/species/ectothiorhodospira-variabilis	Ectothiorhodospira	Ectothiorhodospiraceae	Chromatiales	Gammaproteobacteria	Pseudomonadota	Pseudomonadati
Bhargavaea beijingensis	B			0	12	Tolerant	s	p	Qiu et al 2009	2009	https://lpsn.dsmz.de/species/bhargavaea-beijingensis	Bhargavaea	Caryophanaceae	Caryophanales	Bacilli	Bacillota	Bacillati
Bhargavaea ginsengi	B			0	10	Tolerant	s	p	Qiu et al 2009	2009	https://lpsn.dsmz.de/species/bhargavaea-ginsengi	Bhargavaea	Caryophanaceae	Caryophanales	Bacilli	Bacillota	Bacillati
Fictibacillus solisalsi	B			0	15	Tolerant	s	p	Liu et al 2009	2009	https://lpsn.dsmz.de/species/fictibacillus-solisalsi	Fictibacillus	Bacillaceae	Caryophanales	Bacilli	Bacillota	Bacillati
Litoreibacter arenae	B			0.85	8	Slight	s	p	Kim et al 2009 / Kim et al 2012	2009	https://lpsn.dsmz.de/species/litoreibacter-arenae	Litoreibacter	Roseobacteraceae	Rhodobacterales	Alphaproteobacteria	Pseudomonadota	Pseudomonadati
Novosphingobium mathurense	B					No Class	s	p	Gupta et al 2009	2009	https://lpsn.dsmz.de/species/novosphingobium-mathurense	Novosphingobium	Erythrobacteraceae	Sphingomonadales	Alphaproteobacteria	Pseudomonadota	Pseudomonadati
Novosphingobium panipatense	B					No Class	s	p	Gupta et al 2009	2009	https://lpsn.dsmz.de/species/novosphingobium-panipatense	Novosphingobium	Erythrobacteraceae	Sphingomonadales	Alphaproteobacteria	Pseudomonadota	Pseudomonadati
Ponticaulis koreensis	B			0	6	No Class	s	p	Kang and Lee 2009	2009	https://lpsn.dsmz.de/species/ponticaulis-koreensis	Ponticaulis	Hyphomonadaceae	Caulobacterales	Alphaproteobacteria	Pseudomonadota	Pseudomonadati
Rummeliibacillus stabekisii	B			0	7	Tolerant	s	p	Vaishampayan et al 2009	2009	https://lpsn.dsmz.de/species/rummeliibacillus-stabekisii	Rummeliibacillus	Caryophanaceae	Caryophanales	Bacilli	Bacillota	Bacillati
Amphibacillus jilinensis	B	0.5	0.5	0	2.8	Tolerant	Na+	m	Wu et al 2010	2010	https://lpsn.dsmz.de/species/amphibacillus-jilinensis	Amphibacillus	Bacillaceae	Caryophanales	Bacilli	Bacillota	Bacillati
Nocardioides daedukensis	B	0	0.5	0	9	Tolerant	s	p	Yoon et al 2010	2010	https://lpsn.dsmz.de/species/nocardioides-daedukensis	Nocardioides	Nocardioidaceae	Propionibacteriales	Actinomycetes	Actinomycetota	Bacillati
Thiohalobacter thiocyanaticus	B	0.5	0.5	0.2	3	Moderate	s	m	Sorokin et al 2010	2010	https://lpsn.dsmz.de/species/thiohalobacter-thiocyanaticus	Thiohalobacter	Thiohalobacteraceae	Thiohalobacterales	Gammaproteobacteria	Pseudomonadota	Pseudomonadati
Tistlia consotensis	B	0.5	0.5	0	4	Slight	s	p	Díaz-Cárdenas et al 2010	2010	https://lpsn.dsmz.de/species/tistlia-consotensis	Tistlia	Rhodovibrionaceae	Rhodospirillales	Alphaproteobacteria	Pseudomonadota	Pseudomonadati
Yimella lutea	B	0	1	0	8	Tolerant	s	p	Tang et al 2010	2010	https://lpsn.dsmz.de/species/yimella-lutea	Yimella	Dermacoccaceae	Micrococcales	Actinomycetes	Actinomycetota	Bacillati
Dethiosulfovibrio salsuginis	B	2	2	0.1	7	Slight	s	p	Díaz-Cárdenas et al 2010	2010	https://lpsn.dsmz.de/species/dethiosulfovibrio-salsuginis	Dethiosulfovibrio	Dethiosulfovibrionaceae	Synergistales	Synergistia	Synergistota	Thermotogati
Gallaecimonas pentaromativorans	B	1	2	0	7	Tolerant	s	p	Rodríguez-Blanco et al 2010	2010	https://lpsn.dsmz.de/species/gallaecimonas-pentaromativorans	Gallaecimonas	Gallaecimonadaceae	Enterobacterales	Gammaproteobacteria	Pseudomonadota	Pseudomonadati
Litoribacter ruber	B	0.5	2.5	0	9	Tolerant	s	p	Tian et al 2010	2010	https://lpsn.dsmz.de/species/litoribacter-ruber	Litoribacter	Cytophagaceae	Cytophagales	Cytophagia	Bacteroidota	Pseudomonadati
Nocardiopsis sinuspersici	B	2.5	2.5	0	15	Tolerant	s	p	Hamedi et al 2010	2010	https://lpsn.dsmz.de/species/nocardiopsis-sinuspersici	Nocardiopsis	Nocardiopsidaceae	Streptosporangiales	Actinomycetes	Actinomycetota	Bacillati
Salibacterium halochares	B	2.5	2.5	1	4	Moderate	s	m	Pappa et al 2010 / Reddy et al 2015	2010	https://lpsn.dsmz.de/species/salibacterium-halochares	Salibacterium	Bacillaceae	Caryophanales	Bacilli	Bacillota	Bacillati
Gracilibacillus ureilyticus	B	3	3	0	15	Tolerant	s	p	Huo et al 2010	2010	https://lpsn.dsmz.de/species/gracilibacillus-ureilyticus	Gracilibacillus	Bacillaceae	Caryophanales	Bacilli	Bacillota	Bacillati
Halomonas andesensis	B	1	3	0.5	20	Moderate	s	p	Guzmán et al 2010	2010	https://lpsn.dsmz.de/species/halomonas-andesensis	Halomonas	Halomonadaceae	Oceanospirillales	Gammaproteobacteria	Pseudomonadota	Pseudomonadati
Palleronia aestuarii	B	2	3	1.5	6	Moderate	s	p	Kim et al 2010	2010	https://lpsn.dsmz.de/species/palleronia-aestuarii	Palleronia	Roseobacteraceae	Rhodobacterales	Alphaproteobacteria	Pseudomonadota	Pseudomonadati
Pontibaca methylaminivorans	B	2	3	0.5	10	Slight	s	p	Kim et al 2010	2010	https://lpsn.dsmz.de/species/pontibaca-methylaminivorans	Pontibaca	Roseobacteraceae	Rhodobacterales	Alphaproteobacteria	Pseudomonadota	Pseudomonadati
Qipengyuania nanhaisediminis	B	2	3		10	Slight	s	p	Xu et al 2010	2010	https://lpsn.dsmz.de/species/qipengyuania-nanhaisediminis	Qipengyuania	Erythrobacteraceae	Sphingomonadales	Alphaproteobacteria	Pseudomonadota	Pseudomonadati
Salinarimonas rosea	B	3	3	0	5	Tolerant	s	p	Liu et al 2010	2010	https://lpsn.dsmz.de/species/salinarimonas-rosea	Salinarimonas	Salinarimonadaceae	Hyphomicrobiales	Alphaproteobacteria	Pseudomonadota	Pseudomonadati
Umboniibacter marinipuniceus	B	2.5	3	2	5	No Class	s	p	Romanenko et al 2010	2010	https://lpsn.dsmz.de/species/umboniibacter-marinipuniceus	Umboniibacter	Cellvibrionaceae	Cellvibrionales	Gammaproteobacteria	Pseudomonadota	Pseudomonadati
Chryseobacterium solincola	B	4	4	0	6	Tolerant	s	p	Benmalek et al 2010	2010	https://lpsn.dsmz.de/species/chryseobacterium-solincola	Chryseobacterium	Weeksellaceae	Flavobacteriales	Flavobacteriia	Bacteroidota	Pseudomonadati
Salinimicrobium marinum	B	4	4	0.5	15	No Class	s	p	Nedashkovskaya et al 2010	2010	https://lpsn.dsmz.de/species/salinimicrobium-marinum	Salinimicrobium	Flavobacteriaceae	Flavobacteriales	Flavobacteriia	Bacteroidota	Pseudomonadati
Bacillus chungangensis	B	5	5	0	15	No Class	s	p	Cho et al 2010	2010	https://lpsn.dsmz.de/species/bacillus-chungangensis	Bacillus	Bacillaceae	Caryophanales	Bacilli	Bacillota	Bacillati
Haloechinothrix halophila	B	5	5	1	15	No Class	s	p	Tang et al 2010	2010	https://lpsn.dsmz.de/species/haloechinothrix-halophila	Haloechinothrix	Pseudonocardiaceae	Pseudonocardiales	Actinomycetes	Actinomycetota	Bacillati
Limimaricola pyoseonensis	B	2	5	1	12	No Class	s	p	Moon et al 2010	2010	https://lpsn.dsmz.de/species/limimaricola-pyoseonensis	Limimaricola	Roseobacteraceae	Rhodobacterales	Alphaproteobacteria	Pseudomonadota	Pseudomonadati
Marinobacterium lutimaris	B	2	5	1	10	Moderate	s	p	Kim et al 2010	2010	https://lpsn.dsmz.de/species/marinobacterium-lutimaris	Marinobacterium	Alteromonadaceae	Alteromonadales	Gammaproteobacteria	Pseudomonadota	Pseudomonadati
Pontibacillus litoralis	B	2	5	0.5	15	Moderate	s	p	Chen et al 2010	2010	https://lpsn.dsmz.de/species/pontibacillus-litoralis	Pontibacillus	Bacillaceae	Caryophanales	Bacilli	Bacillota	Bacillati
Cobetia crustatorum	B	6.5	6.5	3.5	11.5	Slight	Salts	p	Kim et al 2010	2010	https://lpsn.dsmz.de/species/cobetia-crustatorum	Cobetia	Halomonadaceae	Oceanospirillales	Gammaproteobacteria	Pseudomonadota	Pseudomonadati
Terribacillus aidingensis	B	3	7	0.5	21	Moderate	s	p	Liu et al 2010	2010	https://lpsn.dsmz.de/species/terribacillus-aidingensis	Terribacillus	Bacillaceae	Caryophanales	Bacilli	Bacillota	Bacillati
Alkaliphilus halophilus	B	7.5	7.5	0.5	15	Moderate	s	p	Wu et al 2010	2010	https://lpsn.dsmz.de/species/alkaliphilus-halophilus	Alkaliphilus	Clostridiaceae	Eubacteriales	Clostridia	Bacillota	Bacillati
Halomonas hamiltonii	B	5	7.5	0	20	No Class	Sea salts	p	Kim et al 2010	2010	https://lpsn.dsmz.de/species/halomonas-hamiltonii	Halomonas	Halomonadaceae	Oceanospirillales	Gammaproteobacteria	Pseudomonadota	Pseudomonadati
Halomonas stevensii	B	3	7.5	0	20	No Class	Sea salt	p	Kim et al 2010	2010	https://lpsn.dsmz.de/species/halomonas-stevensii	Halomonas	Halomonadaceae	Oceanospirillales	Gammaproteobacteria	Pseudomonadota	Pseudomonadati
Amorphus orientalis	B	3	8	0.5	12	Moderate	s	p	Wang et al 2010	2010	https://lpsn.dsmz.de/species/amorphus-orientalis	Amorphus	Acuticoccaceae	Hyphomicrobiales	Alphaproteobacteria	Pseudomonadota	Pseudomonadati
Halomonas titanicae	B	2	8	0.5	25	Moderate	s	p	Sánchesz-Porro et al 2010	2010	https://lpsn.dsmz.de/species/halomonas-titanicae	Halomonas	Halomonadaceae	Oceanospirillales	Gammaproteobacteria	Pseudomonadota	Pseudomonadati
Jeotgalicoccus huakuii	B	3	8	0	23	Tolerant	s	p	Guo et al 2010	2010	https://lpsn.dsmz.de/species/jeotgalicoccus-huakuii	Jeotgalicoccus	Staphylococcaceae	Caryophanales	Bacilli	Bacillota	Bacillati
Virgibacillus subterraneus	B	9	9	0	25	Moderate	s	p	Wang et al 2010	2010	https://lpsn.dsmz.de/species/virgibacillus-subterraneus	Virgibacillus	Bacillaceae	Caryophanales	Bacilli	Bacillota	Bacillati
Georgenia halophila	B	5	10	1	15	No Class	s	p	Tang et al 2010	2010	https://lpsn.dsmz.de/species/georgenia-halophila	Georgenia	Bogoriellaceae	Micrococcales	Actinomycetes	Actinomycetota	Bacillati
Gracilibacillus thailandensis	B	5	10	1	22	Moderate	s	p	Chamroensaksri et al 2010	2010	https://lpsn.dsmz.de/species/gracilibacillus-thailandensis	Gracilibacillus	Bacillaceae	Caryophanales	Bacilli	Bacillota	Bacillati
Kushneria sinocarnis	B	10	10	1	20	Moderate	s	p	Zou and Wang 2010	2010	https://lpsn.dsmz.de/species/kushneria-sinocarnis	Kushneria	Halomonadaceae	Oceanospirillales	Gammaproteobacteria	Pseudomonadota	Pseudomonadati
Lentibacillus persicus	B	7.5	10	3	25	Moderate	s	p	Sánchez-Porro et al 2010	2010	https://lpsn.dsmz.de/species/lentibacillus-persicus	Lentibacillus	Bacillaceae	Caryophanales	Bacilli	Bacillota	Bacillati
Oceanobacillus locisalsi	B	5	10	0	25	Moderate	s	p	Lee et al 2010	2010	https://lpsn.dsmz.de/species/oceanobacillus-locisalsi	Oceanobacillus	Bacillaceae	Caryophanales	Bacilli	Bacillota	Bacillati
Ruania alba	B	7	10	2	16	Moderate	s	p	Tang et al 2010 / Schumann et al 2021	2010	https://lpsn.dsmz.de/species/ruania-alba	Ruania	Ruaniaceae	Micrococcales	Actinomycetes	Actinomycetota	Bacillati
Salinisphaera dokdonensis	B	10	10	4	21	Moderate	s	p	Gi et al 2010	2010	https://lpsn.dsmz.de/species/salinisphaera-dokdonensis	Salinisphaera	Salinisphaeraceae	Nevskiales	Gammaproteobacteria	Pseudomonadota	Pseudomonadati
Salinicoccus carnicancri	B	12	12	0	20	Moderate	s	p	Jung et al 2010	2010	https://lpsn.dsmz.de/species/salinicoccus-carnicancri	Salinicoccus	Staphylococcaceae	Caryophanales	Bacilli	Bacillota	Bacillati
Halomonas xinjiangensis	B	10	13	0	20	Tolerant	s	p	Guan et al 2010	2010	https://lpsn.dsmz.de/species/halomonas-xinjiangensis	Halomonas	Halomonadaceae	Oceanospirillales	Gammaproteobacteria	Pseudomonadota	Pseudomonadati
Geomicrobium halophilum	B	10	15	5	25	Moderate	s	p	Echigo et al 2010	2010	https://lpsn.dsmz.de/species/geomicrobium-halophilum	Geomicrobium	Bacillaceae	Caryophanales	Bacilli	Bacillota	Bacillati
Haloechinothrix alba	B	15	15	9	23	Moderate	s	p	Tang et al 2010	2010	https://lpsn.dsmz.de/species/haloechinothrix-alba	Haloechinothrix	Pseudonocardiaceae	Pseudonocardiales	Actinomycetes	Actinomycetota	Bacillati
Lentibacillus jeotgali	B	10	15	3	20	Moderate	s	p	Jung et al 2010	2010	https://lpsn.dsmz.de/species/lentibacillus-jeotgali	Lentibacillus	Bacillaceae	Caryophanales	Bacilli	Bacillota	Bacillati
Salsuginibacillus halophilus	B	19	19	9	30	Extreme	s	p	Cao et al. 2010	2010	https://lpsn.dsmz.de/species/salsuginibacillus-halophilus	Salsuginibacillus	Bacillaceae	Caryophanales	Bacilli	Bacillota	Bacillati
Desulfosalsimonas propionicica	B	60	60	10	200	Moderate	s	g	Kjeldsen et al 2010	2010	https://lpsn.dsmz.de/species/desulfosalsimonas-propionicica	Desulfosalsimonas	Desulfobacteraceae	Desulfobacterales	Deltaproteobacteria	Pseudomonadota	Pseudomonadati
Natronorubrum daqingense	A	2	2.5	1.7	5.137	Extreme	s	m	Wang et al 2010	2010	https://lpsn.dsmz.de/species/natronorubrum-daqingense	Natronorubrum	Natrialbaceae	Halobacteriales	Halobacteria	Methanobacteriota	Methanobacteriati
Haloplanus vescus	A	3.1	3.1	2.6	4.3	Extreme	s	m	Cui et al 2010	2010	https://lpsn.dsmz.de/species/haloplanus-vescus	Haloplanus	Haloferacaceae	Halobacteriales	Halobacteria	Methanobacteriota	Methanobacteriati
Haladaptatus litoreus	A	3.4	3.4	1.7	5.1	Extreme	s	m	Cui et al 2010	2010	https://lpsn.dsmz.de/species/haladaptatus-litoreus	Haladaptatus	Halobacteriaceae	Halobacteriales	Halobacteria	Methanobacteriota	Methanobacteriati
Natronorubrum sediminis	A	3.4	3.4	2.5	5	Extreme	s	m	Gutiérrez et al 2010	2010	https://lpsn.dsmz.de/species/natronorubrum-sediminis	Natronorubrum	Natrialbaceae	Halobacteriales	Halobacteria	Methanobacteriota	Methanobacteriati
Halogeometricum limi	A	3.9	3.9	2.1	5.1	No Class	s	m	Cui et al 2010	2010	https://lpsn.dsmz.de/species/halosarcina-limi	Halogeometricum	Haloferacaceae	Halobacteriales	Halobacteria	Methanobacteriota	Methanobacteriati
Halogeometricum rufum	A	3.9	3.9	2.1	5.1	No Class	s	m	Cui et al 2010	2010	https://lpsn.dsmz.de/species/halogeometricum-rufum	Halogeometricum	Haloferacaceae	Halobacteriales	Halobacteria	Methanobacteriota	Methanobacteriati
Halogranum rubrum	A	3.9	3.9	2.6	4.3	Extreme	s	m	Cui et al 2010	2010	https://lpsn.dsmz.de/species/halogranum-rubrum	Halogranum	Haloferacaceae	Halobacteriales	Halobacteria	Methanobacteriota	Methanobacteriati
Halopelagius inordinatus	A	3,,4	3.9	2.6	4.8	Extreme	s	m	Cui et al 2010	2010	https://lpsn.dsmz.de/species/halopelagius-inordinatus	Halopelagius	Haloferacaceae	Halobacteriales	Halobacteria	Methanobacteriota	Methanobacteriati
Halonotius pteroides	A	3.4	4.1	2.7	6	Extreme	s	m	Burns et al 2010	2010	https://lpsn.dsmz.de/species/halonotius-pteroides	Halonotius	Haloferacaceae	Halobacteriales	Halobacteria	Methanobacteriota	Methanobacteriati
Halopiger aswanensis	A	3.8	4.3	1.7	5.137	Extreme	s	m	Hezayen et al 2010	2010	https://lpsn.dsmz.de/species/halopiger-aswanensis	Halopiger	Natrialbaceae	Halobacteriales	Halobacteria	Methanobacteriota	Methanobacteriati
Natronoarchaeum mannanilyticum	A	4	4.5	2	5.3	Extreme	s	m	Shimane et al 2010	2010	https://lpsn.dsmz.de/species/natronoarchaeum-mannanilyticum	Natronoarchaeum	Natronoarchaeaceae	Halobacteriales	Halobacteria	Methanobacteriota	Methanobacteriati
Haladaptatus cibarius	A	15	15	10	30	Extreme	s	p	Roh et al 2010	2010	https://lpsn.dsmz.de/species/haladaptatus-cibarius	Haladaptatus	Halobacteriaceae	Halobacteriales	Halobacteria	Methanobacteriota	Methanobacteriati
Halostagnicola kamekurae	A	15	15	10	30	Extreme	s	p	Nagaoka et al 2010	2010	https://lpsn.dsmz.de/species/halostagnicola-kamekurae	Halostagnicola	Natrialbaceae	Halobacteriales	Halobacteria	Methanobacteriota	Methanobacteriati
Natronomonas moolapensis	A	18	20	14	36	Extreme	s	p	Burns et al 2010	2010	https://lpsn.dsmz.de/species/natronomonas-moolapensis	Natronomonas	Halobacteriaceae	Halobacteriales	Halobacteria	Methanobacteriota	Methanobacteriati
Halarchaeum acidiphilum	A	21	24	18	30	Moderate	s	p	Minegishi et al 2010	2010	https://lpsn.dsmz.de/species/halarchaeum-acidiphilum	Halarchaeum	Halobacteriaceae	Halobacteriales	Halobacteria	Methanobacteriota	Methanobacteriati
Altererythrobacter ishigakiensis	B	1.5	2			No Class	s	p	Matsumoto et al 2011	2011	https://lpsn.dsmz.de/species/altererythrobacter-ishigakiensis	Altererythrobacter	Erythrobacteraceae	Sphingomonadales	Alphaproteobacteria	Pseudomonadota	Pseudomonadati
Calditerricola satsumensis	B	2	2	0.3	4	Tolerant	s	p	Moriya et al 2011	2011	https://lpsn.dsmz.de/species/calditerricola-satsumensis	Calditerricola	Bacillaceae	Caryophanales	Bacilli	Bacillota	Bacillati
Cytobacillus luteolus	B	0	2	0	10	Tolerant	s	p	Shi et al 2011 / Gupta et al 2020	2011	https://lpsn.dsmz.de/species/cytobacillus-luteolus	Cytobacillus	Cytobacillaceae	Caryophanales	Bacilli	Bacillota	Bacillati
Thioprofundum hispidum	B	2	2	1	4	Moderate	s	p	Mori et al 2011	2011	https://lpsn.dsmz.de/species/thioprofundum-hispidum	Thioprofundum	Thioprofundaceae	Chromatiales	Gammaproteobacteria	Pseudomonadota	Pseudomonadati
Alkalibacterium subtropicum	B	1	3	0	17	Slight	s	p	Ishikawa et al 2011	2011	https://lpsn.dsmz.de/species/alkalibacterium-subtropicum	Alkalibacterium	Carnobacteriaceae	Lactobacillales	Bacilli	Bacillota	Bacillati
Jeotgalicoccus aerolatus	B	2	3	0.1	16	Slight	s	p	Liu et al 2011 / Martin et al 2011	2011	https://lpsn.dsmz.de/species/jeotgalicoccus-aerolatus	Jeotgalicoccus	Staphylococcaceae	Caryophanales	Bacilli	Bacillota	Bacillati
Luteimonas lutimaris	B	0	3	0	9	Tolerant	s	p	Park et al 2011	2011	https://lpsn.dsmz.de/species/luteimonas-lutimaris	Luteimonas	Lysobacteraceae	Lysobacterales	Gammaproteobacteria	Pseudomonadota	Pseudomonadati
Thioalbus denitrificans	B	3	3	1	5	Slight	s	p	Park et al 2011	2011	https://lpsn.dsmz.de/species/thioalbus-denitrificans	Thioalbus	Ectothiorhodospiraceae	Chromatiales	Gammaproteobacteria	Pseudomonadota	Pseudomonadati
Fictibacillus nanhaiensis	B	0.5	4	0	18	Slight	s	p	Chen et al 2011	2011	https://lpsn.dsmz.de/species/fictibacillus-nanhaiensis	Fictibacillus	Bacillaceae	Caryophanales	Bacilli	Bacillota	Bacillati
Salipiger aestuarii	B	2	4	1	11	Moderate	s	p	Park et al 2011	2011	https://lpsn.dsmz.de/species/salipiger-aestuarii	Salipiger	Roseobacteraceae	Rhodobacterales	Alphaproteobacteria	Pseudomonadota	Pseudomonadati
Shouchella xiaoxiensis	B	2	4	0.5	20	Slight	s	p	Chen et al 2011	2011	https://lpsn.dsmz.de/species/shouchella-xiaoxiensis	Shouchella	Bacillaceae	Caryophanales	Bacilli	Bacillota	Bacillati
Alcanivorax pacificus	B	3	5	0.5	12	Moderate	s	p	Lai et al 2011	2011	https://lpsn.dsmz.de/species/alcanivorax-pacificus	Alcanivorax	Alcanivoracaceae	Oceanospirillales	Gammaproteobacteria	Pseudomonadota	Pseudomonadati
Cellulomonas phragmiteti	B	5	5	2	7	Moderate	s	p	Rusznyák et al 2011	2011	https://lpsn.dsmz.de/species/cellulomonas-phragmiteti	Cellulomonas	Cellulomonadaceae	Micrococcales	Actinomycetes	Actinomycetota	Bacillati
Halalkalibacter alkalisediminis	B	5	5	2	10	Moderate	s	p	Borsodi et al 2011	2011	https://lpsn.dsmz.de/species/halalkalibacter-alkalisediminis	Halalkalibacter	Bacillaceae	Caryophanales	Bacilli	Bacillota	Bacillati
Myceligenerans halotolerans	B	0	5	0	10	Tolerant	s	p	Wang et al 2011	2011	https://lpsn.dsmz.de/species/myceligenerans-halotolerans	Myceligenerans	Promicromonosporaceae	Micrococcales	Actinomycetes	Actinomycetota	Bacillati
Paracoccus stylophorae	B	5	5	0	9	No Class	s	p	Sheu et al 2011	2011	https://lpsn.dsmz.de/species/paracoccus-stylophorae	Paracoccus	Paracoccaceae	Rhodobacterales	Alphaproteobacteria	Pseudomonadota	Pseudomonadati
Serinicoccus profundi	B	3	5	0	14	Moderate	s	p	Xiao et al 2011	2011	https://lpsn.dsmz.de/species/serinicoccus-profundi	Serinicoccus	Ornithinimicrobiaceae	Micrococcales	Actinomycetes	Actinomycetota	Bacillati
Streptohalobacillus salinus	B	7	7	0	20	Moderate	s	p	Wang et al 2011	2011	https://lpsn.dsmz.de/species/streptohalobacillus-salinus	Streptohalobacillus	Bacillaceae	Caryophanales	Bacilli	Bacillota	Bacillati
Halomonas rifensis	B	5	7.5	0.5	20	Moderate	Sea salts	p	Amjres et al 2011	2011	https://lpsn.dsmz.de/species/halomonas-rifensis	Halomonas	Halomonadaceae	Oceanospirillales	Gammaproteobacteria	Pseudomonadota	Pseudomonadati
Marinobacter oulmenensis	B	5	7.5	1	15	Moderate	s	p	Kharroub et al 2011	2011	https://lpsn.dsmz.de/species/marinobacter-oulmenensis	Marinobacter	Alteromonadaceae	Alteromonadales	Gammaproteobacteria	Pseudomonadota	Pseudomonadati
Alkalihalobacillus hemicentroti	B	5	8	0.5	25	Moderate	s	p	Chen et al 2011 / Patel and Gupta 2020	2011	https://lpsn.dsmz.de/species/alkalihalobacillus-hemicentroti	Alkalihalobacillus	Bacillaceae	Caryophanales	Bacilli	Bacillota	Bacillati
Brachybacterium saurashtrense	B	8	8	0	15	Tolerant	s	p	Gontia et al 2011	2011	https://lpsn.dsmz.de/species/brachybacterium-saurashtrense	Brachybacterium	Dermabacteraceae	Micrococcales	Actinomycetes	Actinomycetota	Bacillati
Halomonas daqiaonensis	B	7	8	2	15	Moderate	s	p	Qu et al 2011	2011	https://lpsn.dsmz.de/species/halomonas-daqiaonensis	Halomonas	Halomonadaceae	Oceanospirillales	Gammaproteobacteria	Pseudomonadota	Pseudomonadati
Pontibacillus yanchengensis	B	6	8	3	20	Moderate	s	p	Yang et al 2011	2011	https://lpsn.dsmz.de/species/pontibacillus-yanchengensis	Pontibacillus	Bacillaceae	Caryophanales	Bacilli	Bacillota	Bacillati
Roseicitreum antarcticum	B	7	8	0	15	Moderate	s	p	Yu et al 2011	2011	https://lpsn.dsmz.de/species/roseicitreum-antarcticum	Roseicitreum	Paracoccaceae	Rhodobacterales	Alphaproteobacteria	Pseudomonadota	Pseudomonadati
Corynebacterium humireducens	B	10	10	0	13	Tolerant	s	p	Wu et al 2011	2011	https://lpsn.dsmz.de/species/corynebacterium-humireducens	Corynebacterium	Corynebacteriaceae	Mycobacteriales	Actinomycetes	Actinomycetota	Bacillati
Halomonas stenophila	B	5	10	3	15	Moderate	s	p	Llamas et al 2011	2011	https://lpsn.dsmz.de/species/halomonas-stenophila	Halomonas	Halomonadaceae	Oceanospirillales	Gammaproteobacteria	Pseudomonadota	Pseudomonadati
Halomonas vilamensis	B	5	10	1	25	Moderate	s	p	Menes et al 2011	2011	https://lpsn.dsmz.de/species/halomonas-vilamensis	Halomonas	Halomonadaceae	Oceanospirillales	Gammaproteobacteria	Pseudomonadota	Pseudomonadati
Kangiella spongicola	B	2	10	0	15	No Class	s	p	Ahn et al 2011	2011	https://lpsn.dsmz.de/species/kangiella-spongicola	Kangiella	Kangiellaceae	Oceanospirillales	Gammaproteobacteria	Pseudomonadota	Pseudomonadati
Marinobacter daqiaonensis	B	5	10	1	15	Moderate	s	p	Qu et al 2011	2011	https://lpsn.dsmz.de/species/marinobacter-daqiaonensis	Marinobacter	Alteromonadaceae	Alteromonadales	Gammaproteobacteria	Pseudomonadota	Pseudomonadati
Thalassobacillus pellis	B	10	10	0.5	25	Moderate	s	p	Sánchez-Porro et al 2011	2011	https://lpsn.dsmz.de/species/thalassobacillus-pellis	Thalassobacillus	Bacillaceae	Caryophanales	Bacilli	Bacillota	Bacillati
Virgibacillus alimentarius	B	9	10	0	30	No Class	s	p	Kim et al 2011	2011	https://lpsn.dsmz.de/species/virgibacillus-alimentarius	Virgibacillus	Bacillaceae	Caryophanales	Bacilli	Bacillota	Bacillati
Serinicoccus chungangensis	B	13	13	0	15	Moderate	s	p	Traiwan et al 2011	2011	https://lpsn.dsmz.de/species/serinicoccus-chungangensis	Serinicoccus	Ornithinimicrobiaceae	Micrococcales	Actinomycetes	Actinomycetota	Bacillati
Actinopolyspora alba	B	15	15	10	25	Moderate	s	p	Tang et al 2011	2011	https://lpsn.dsmz.de/species/actinopolyspora-alba	Actinopolyspora	Pseudonocardiaceae	Pseudonocardiales	Actinomycetes	Actinomycetota	Bacillati
Actinopolyspora erythraea	B	15	15	10	25	Moderate	s	p	Tang et al 2011	2011	https://lpsn.dsmz.de/species/actinopolyspora-erythraea	Actinopolyspora	Pseudonocardiaceae	Pseudonocardiales	Actinomycetes	Actinomycetota	Bacillati
Haloactinopolyspora alba	B	10	15	7	23	Moderate	s	p	Tang et al 2011	2011	https://lpsn.dsmz.de/species/haloactinopolyspora-alba	Haloactinopolyspora	Jiangellaceae	Jiangellales	Actinomycetes	Actinomycetota	Bacillati
Desulfosoma caldarium	B	25	25	5	30	Slight	s	g	Baena et al 2011	2011	https://lpsn.dsmz.de/species/desulfosoma-caldarium	Desulfosoma	Syntrophobacteraceae	Syntrophobacterales	Deltaproteobacteria	Pseudomonadota	Pseudomonadati
Sporosalibacterium faouarense	B	40	40	0.5	150	Moderate	s	g	Rezgui et al 2011	2011	https://lpsn.dsmz.de/species/sporosalibacterium-faouarense	Sporosalibacterium	Clostridiaceae	Eubacteriales	Clostridia	Bacillota	Bacillati
Photobacterium aphoticum	B			0.85	7	Slight	Total salts	p	Lucena et al 2011	2011	https://lpsn.dsmz.de/species/photobacterium-aphoticum	Photobacterium	Vibrionaceae	Vibrionales	Gammaproteobacteria	Pseudomonadota	Pseudomonadati
Methanobacterium ferruginis	A	0.34	0.34	0	1.2	No Class	s	m	Mori and Haeayama 2011	2011	https://lpsn.dsmz.de/species/methanobacterium-ferruginis	Methanobacterium	Methanobacteriaceae	Methanobacteriales	Methanobacteria	Methanobacteriota	Methanobacteriati
Methanobacterium petrolearium	A	0	0.68	0	1.2	Tolerant	s	m	Mori and Haeayama 2011	2011	https://lpsn.dsmz.de/species/methanobacterium-petrolearium	Methanobacterium	Methanobacteriaceae	Methanobacteriales	Methanobacteria	Methanobacteriota	Methanobacteriati
Haloplanus aerogenes	A	2.1	2.1	1.4	5.1	Extreme	s	m	Cui et al 2011	2011	https://lpsn.dsmz.de/species/haloplanus-aerogenes	Haloplanus	Haloferacaceae	Halobacteriales	Halobacteria	Methanobacteriota	Methanobacteriati
Halomarina oriensis	A	2.6	2.6	1.7	5	Extreme	s	m	Inoue et al 2011	2011	https://lpsn.dsmz.de/species/halomarina-oriensis	Halomarina	Halobacteriaceae	Halobacteriales	Halobacteria	Methanobacteriota	Methanobacteriati
Salarchaeum japonicum	A	2.5	3	1.5	5.3	Extreme	s	m	Shimane et al 2011	2011	https://lpsn.dsmz.de/species/salarchaeum-japonicum	Salarchaeum	Halobacteriaceae	Halobacteriales	Halobacteria	Methanobacteriota	Methanobacteriati
Halogranum amylolyticum	A	3.4	3.4	1.4	5.1	Extreme	s	m	Cui et al 2011	2011	https://lpsn.dsmz.de/species/halogranum-amylolyticum	Halogranum	Haloferacaceae	Halobacteriales	Halobacteria	Methanobacteriota	Methanobacteriati
Halorubrum aquaticum	A	3.4	3.4	2.5	5	No Class	s	m	Gutiérrez et al 2011	2011	https://lpsn.dsmz.de/species/halorubrum-aquaticum	Halorubrum	Haloferacaceae	Halobacteriales	Halobacteria	Methanobacteriota	Methanobacteriati
Halogranum gelatinilyticum	A	3.4	3.9	1.7	5.1	Extreme	s	m	Cui et al 2011	2011	https://lpsn.dsmz.de/species/halogranum-gelatinilyticum	Halogranum	Haloferacaceae	Halobacteriales	Halobacteria	Methanobacteriota	Methanobacteriati
Halolamina pelagica	A	3.4	3.9	1.4	5.1	Extreme	s	m	Cui et al 2011	2011	https://lpsn.dsmz.de/species/halolamina-pelagica	Halolamina	Haloferacaceae	Halobacteriales	Halobacteria	Methanobacteriota	Methanobacteriati
Halobellus clavatus	A	15	15	10	30	Extreme	s	p	Cui et al 2011	2011	https://lpsn.dsmz.de/species/halobellus-clavatus	Halobellus	Haloferacaceae	Halobacteriales	Halobacteria	Methanobacteriota	Methanobacteriati
Halorientalis regularis	A	18	20	15	30	Extreme	s	p	Cui et al 2011	2011	https://lpsn.dsmz.de/species/halorientalis-regularis	Halorientalis	Haloarculaceae	Halobacteriales	Halobacteria	Methanobacteriota	Methanobacteriati
Haloarcula salaria	A	20	25	15	30	Extreme	s	p	Namwong et al 2011	2011	https://lpsn.dsmz.de/species/haloarcula-salaria	Haloarcula	Haloarculaceae	Halobacteriales	Halobacteria	Methanobacteriota	Methanobacteriati
Haloarcula tradensis	A	20	25	15	30	Extreme	s	p	Namwong et al 2011	2011	https://lpsn.dsmz.de/species/haloarcula-tradensis	Haloarcula	Haloarculaceae	Halobacteriales	Halobacteria	Methanobacteriota	Methanobacteriati
Halostagnicola alkaliphila	A	25	25	20	30	No Class	s	p	Nagaoka et al 2011	2011	https://lpsn.dsmz.de/species/halostagnicola-alkaliphila	Halostagnicola	Natrialbaceae	Halobacteriales	Halobacteria	Methanobacteriota	Methanobacteriati
Desulfobulbus alkaliphilus	B	0.2	0.2	0.1	1.5	Moderate	Na+	m	Sorokin et al 2012	2012	https://lpsn.dsmz.de/species/desulfobulbus-alkaliphilus	Desulfobulbus	Desulfobulbaceae	Desulfobacterales	Deltaproteobacteria	Pseudomonadota	Pseudomonadati
Thioalkalivibrio sulfidiphilus	B	0.4	0.4	0.2	1.5	Tolerant	Na+	m	Sorokin et al 2012	2012	https://lpsn.dsmz.de/species/thioalkalivibrio-sulfidiphilus	Thioalkalivibrio	Ectothiorhodospiraceae	Chromatiales	Gammaproteobacteria	Pseudomonadota	Pseudomonadati
Defluviitoga tunisiensis	B	0.5	0.5	0.2	3	Slight	s	p	Hania et al 2012	2012	https://lpsn.dsmz.de/species/defluviitoga-tunisiensis	Defluviitoga	Petrotogaceae	Petrotogales	Thermotogae	Thermotogota	Thermotogati
Desulfobaculum xiamenense	B	0.5	0.5	0.2	3.5	Moderate	s	p	Zhao et al 2012	2012	https://lpsn.dsmz.de/species/desulfobaculum-xiamenense	Desulfobaculum	Desulfovibrionaceae	Desulfovibrionales	Deltaproteobacteria	Pseudomonadota	Pseudomonadati
Winogradskyella ulvae	B	0.5	0.5	0.5	4	Slight	s	p	Nedashkovskaya et al 2012	2012	https://lpsn.dsmz.de/species/winogradskyella-ulvae	Winogradskyella	Flavobacteriaceae	Flavobacteriales	Flavobacteriia	Bacteroidota	Pseudomonadati
Desulfonatronobacter acidivorans	B	0.6	0.6	0.2	1.5	Moderate	Na+	m	Sorokin et al 2012	2012	https://lpsn.dsmz.de/species/desulfonatronobacter-acidivorans	Desulfonatronobacter	Desulfobacteraceae	Desulfobacterales	Deltaproteobacteria	Pseudomonadota	Pseudomonadati
Amphibacillus cookii	B	0.9	0.9	0.1	4.5	Moderate	Na+	m	Pugin et al 2012	2012	https://lpsn.dsmz.de/species/amphibacillus-cookii	Amphibacillus	Bacillaceae	Caryophanales	Bacilli	Bacillota	Bacillati
Acetomicrobium hydrogeniformans	B	1	1	0.8	7	No Class	s	p	Maune and Tanner 2012	2012	https://lpsn.dsmz.de/species/acetomicrobium-hydrogeniformans	Acetomicrobium	Synergistaceae	Synergistales	Synergistia	Synergistota	Thermotogati
Mangroviflexus xiamenensis	B	0.5	1	0.2	3.5	Moderate	s	p	Zhao et al 2012	2012	https://lpsn.dsmz.de/species/mangroviflexus-xiamenensis	Mangroviflexus	Marinilabiliaceae	Bacteroidales	Bacteroidia	Bacteroidota	Pseudomonadati
Mongoliitalea lutea	B	1	1	0	5.5	Tolerant	s	p	Yang et al 2012	2012	https://lpsn.dsmz.de/species/mongoliitalea-lutea	Mongoliitalea	Cyclobacteriaceae	Cytophagales	Cytophagia	Bacteroidota	Pseudomonadati
Tepidibacter mesophilus	B	0.5	1	0	9	Tolerant	s	p	Tan et al 2012	2012	https://lpsn.dsmz.de/species/tepidibacter-mesophilus	Tepidibacter	Tepidibacteraceae	Eubacteriales	Clostridia	Bacillota	Bacillati
Marinobacter xestospongiae	B	2	2	0.5	6	Slight	s	p	Lee et al 2012	2012	https://lpsn.dsmz.de/species/marinobacter-xestospongiae	Marinobacter	Alteromonadaceae	Alteromonadales	Gammaproteobacteria	Pseudomonadota	Pseudomonadati
Oceanisphaera sediminis	B	2	2	1	5	Slight	s	p	Shin et al 2012	2012	https://lpsn.dsmz.de/species/oceanisphaera-sediminis	Oceanisphaera	Aeromonadaceae	Aeromonadales	Gammaproteobacteria	Pseudomonadota	Pseudomonadati
Planococcus halocryophilus	B	2	2	0	19	Tolerant	s	p	Mykytczuk et al 2012	2012	https://lpsn.dsmz.de/species/planococcus-halocryophilus	Planococcus	Caryophanaceae	Caryophanales	Bacilli	Bacillota	Bacillati
Ruegeria conchae	B	2	2	1	5	Slight	s	p	Lee et al 2012	2012	https://lpsn.dsmz.de/species/ruegeria-conchae	Ruegeria	Roseobacteraceae	Rhodobacterales	Alphaproteobacteria	Pseudomonadota	Pseudomonadati
Streptomyces pharmamarensis	B	2	2		9	Tolerant	s	p	Carro et al 2012	2012	https://lpsn.dsmz.de/species/streptomyces-pharmamarensis	Streptomyces	Streptomycetaceae	Kitasatosporales	Actinomycetes	Actinomycetota	Bacillati
Algiphilus aromaticivorans	B	3	3	0	12	Slight	s	p	Gutierrez et al 2012	2012	https://lpsn.dsmz.de/species/algiphilus-aromaticivorans	Algiphilus	Algiphilaceae	Nevskiales	Gammaproteobacteria	Pseudomonadota	Pseudomonadati
Fusibacter tunisiensis	B	3	3	0	10	Tolerant	s	p	Hania et al 2012	2012	https://lpsn.dsmz.de/species/fusibacter-tunisiensis	Fusibacter	Incertae sedis	Eubacteriales	Clostridia	Bacillota	Bacillati
Gracilibacillus kekensis	B	3	3	0	22	Moderate	s	p	Gao et al 2012	2012	https://lpsn.dsmz.de/species/gracilibacillus-kekensis	Gracilibacillus	Bacillaceae	Caryophanales	Bacilli	Bacillota	Bacillati
Qipengyuania pelagi	B	2	3		8	Slight	s	p	Wu et al 2012	2012	https://lpsn.dsmz.de/species/qipengyuania-pelagi	Qipengyuania	Erythrobacteraceae	Sphingomonadales	Alphaproteobacteria	Pseudomonadota	Pseudomonadati
Rhodovulum tesquicola	B	1	3	0.3	10	No Class	s	p	Kompantseva et al 2012	2012	https://lpsn.dsmz.de/species/rhodovulum-tesquicola	Rhodovulum	Roseobacteraceae	Rhodobacterales	Alphaproteobacteria	Pseudomonadota	Pseudomonadati
Salinicoccus qingdaonensis	B	3	3	0	25	Moderate	s	p	Qu et al 2012	2012	https://lpsn.dsmz.de/species/salinicoccus-qingdaonensis	Salinicoccus	Staphylococcaceae	Caryophanales	Bacilli	Bacillota	Bacillati
Salinivenus iranica	B	3	3	2	5	Extreme	s	m	Makhdoumi-Kakhki et al 2012	2012	https://lpsn.dsmz.de/species/salinivenus-iranica	Salinivenus	Salinibacteraceae	Rhodothermales	Rhodothermia	Rhodothermota	Pseudomonadati
Salinivenus lutea	B	3	3	2	5	Extreme	s	m	Makhdoumi-Kakhki et al 2012	2012	https://lpsn.dsmz.de/species/salinivenus-lutea	Salinivenus	Salinibacteraceae	Rhodothermales	Rhodothermia	Rhodothermota	Pseudomonadati
Kordiimonas aestuarii	B	2	3.5	1	9	Slight	s	p	Math et al 2012	2012	https://lpsn.dsmz.de/species/kordiimonas-aestuarii	Kordiimonas	Temperatibacteraceae	Kordiimonadales	Alphaproteobacteria	Pseudomonadota	Pseudomonadati
Hasllibacter halocynthiae	B	4	4	1	5	No Class	s	p	Kim et al 2012	2012	https://lpsn.dsmz.de/species/hasllibacter-halocynthiae	Hasllibacter	Roseobacteraceae	Rhodobacterales	Alphaproteobacteria	Pseudomonadota	Pseudomonadati
Marinobacter antarcticus	B	3	4	0	25	Tolerant	s	p	Liu et al 2012	2012	https://lpsn.dsmz.de/species/marinobacter-antarcticus	Marinobacter	Alteromonadaceae	Alteromonadales	Gammaproteobacteria	Pseudomonadota	Pseudomonadati
Mongoliicoccus roseus	B	3	4	0	10	Tolerant	s	p	Liu et al 2012	2012	https://lpsn.dsmz.de/species/mongoliicoccus-roseus	Mongoliicoccus	Cyclobacteriaceae	Cytophagales	Cytophagia	Bacteroidota	Pseudomonadati
Aliidiomarina taiwanensis	B	1.5	5	0.5	10	No Class	s	p	Huang et al 2012	2012	https://lpsn.dsmz.de/species/aliidiomarina-taiwanensis	Aliidiomarina	Idiomarinaceae	Alteromonadales	Gammaproteobacteria	Pseudomonadota	Pseudomonadati
Haloechinothrix salitolerans	B	5	5	0	13	Tolerant	s	p	Guan et al 2012	2012	https://lpsn.dsmz.de/species/haloechinothrix-salitolerans	Haloechinothrix	Pseudonocardiaceae	Pseudonocardiales	Actinomycetes	Actinomycetota	Bacillati
Anaerosalibacter bizertensis	B	5	5	0	100	Tolerant	s	g	Rezgui et al 2012	2012	https://lpsn.dsmz.de/species/anaerosalibacter-bizertensis	Anaerosalibacter	Tissierellaceae	Tissierellales	Clostridia	Bacillota	Bacillati
Kangiella marina	B	2	5	1	8	No Class	s	p	Jean et al 2012	2012	https://lpsn.dsmz.de/species/kangiella-marina	Kangiella	Kangiellaceae	Oceanospirillales	Gammaproteobacteria	Pseudomonadota	Pseudomonadati
Kangiella taiwanensis	B	2	5	0.5	12	No Class	s	p	Jean et al 2012	2012	https://lpsn.dsmz.de/species/kangiella-taiwanensis	Kangiella	Kangiellaceae	Oceanospirillales	Gammaproteobacteria	Pseudomonadota	Pseudomonadati
Rhizobium halophytocola	B	2.5	5.5	0	7.5	No Class	s	p	Bibi et al 2012	2012	https://lpsn.dsmz.de/species/rhizobium-halophytocola	Rhizobium	Rhizobiaceae	Hyphomicrobiales	Alphaproteobacteria	Pseudomonadota	Pseudomonadati
Gracilibacillus bigeumensis	B	7	7	1	22	Moderate	s	p	Kim et al 2012	2012	https://lpsn.dsmz.de/species/gracilibacillus-bigeumensis	Gracilibacillus	Bacillaceae	Caryophanales	Bacilli	Bacillota	Bacillati
Alteribacillus bidgolensis	B	5	7.5	0.5	12.5	Moderate	s	p	Didari et al 2012	2012	https://lpsn.dsmz.de/species/alteribacillus-bidgolensis	Alteribacillus	Bacillaceae	Caryophanales	Bacilli	Bacillota	Bacillati
Alteribacillus iranensis	B	5	7.5	2.5	15	Moderate	s	p	Bagheri et al 2012 / Begum et al 2016	2012	https://lpsn.dsmz.de/species/alteribacillus-iranensis	Alteribacillus	Bacillaceae	Caryophanales	Bacilli	Bacillota	Bacillati
Halomonas ramblicola	B	5	7.5	1	30	Moderate	s	p	Luque et al 2012	2012	https://lpsn.dsmz.de/species/halomonas-ramblicola	Halomonas	Halomonadaceae	Oceanospirillales	Gammaproteobacteria	Pseudomonadota	Pseudomonadati
Halomonas xianhensis	B	5	8	0.05	27.5	Moderate	Total salts	p	Zhao et al 2012	2012	https://lpsn.dsmz.de/species/halomonas-xianhensis	Halomonas	Halomonadaceae	Oceanospirillales	Gammaproteobacteria	Pseudomonadota	Pseudomonadati
Psychroflexus halocasei	B	6	8	2.5	16	Moderate	s	p	Seiler et al 2012	2012	https://lpsn.dsmz.de/species/psychroflexus-halocasei	Psychroflexus	Flavobacteriaceae	Flavobacteriales	Flavobacteriia	Bacteroidota	Pseudomonadati
Fuchsiella alkaliacetigena	B	7	8.5	0	14	Tolerant	s	p	Zhilina et al 2012	2012	https://lpsn.dsmz.de/species/fuchsiella-alkaliacetigena	Fuchsiella	Halobacteroidaceae	Halanaerobiales	Clostridia	Bacillota	Bacillati
Salisediminibacterium halotolerans	B	9	9	3	30	No Class	s	p	Jiang et al 2012	2012	https://lpsn.dsmz.de/species/salisediminibacterium-halotolerans	Salisediminibacterium	Bacillaceae	Caryophanales	Bacilli	Bacillota	Bacillati
Halomonas beimenensis	B	5	10	0	15	No Class	s	p	Wang et al 2012	2012	https://lpsn.dsmz.de/species/halomonas-beimenensis	Halomonas	Halomonadaceae	Oceanospirillales	Gammaproteobacteria	Pseudomonadota	Pseudomonadati
Roseivivax sediminis	B	5	10	1	15	Moderate	s	p	Xiao et al 2012	2012	https://lpsn.dsmz.de/species/roseivivax-sediminis	Roseivivax	Roseobacteraceae	Rhodobacterales	Alphaproteobacteria	Pseudomonadota	Pseudomonadati
Salinactinospora qingdaonensis	B	9	12	1	23	Moderate	s	p	Chang et al 2012	2012	https://lpsn.dsmz.de/species/salinactinospora-qingdaonensis	Salinactinospora	Nocardiopsidaceae	Streptosporangiales	Actinomycetes	Actinomycetota	Bacillati
Fodinibius salinus	B	10	15	4	23	Moderate	s	p	Wang et al 2012	2012	https://lpsn.dsmz.de/species/fodinibius-salinus	Fodinibius	Balneolaceae	Balneolales	Balneolia	Balneolota	Pseudomonadati
Halanaerobacter jeridensis	B	15	15	6	30	Moderate	s	p	Mezghani et al 2012	2012	https://lpsn.dsmz.de/species/halanaerobacter-jeridensis	Halanaerobacter	Halobacteroidaceae	Halanaerobiales	Clostridia	Bacillota	Bacillati
Natribacillus halophilus	B	10	15	7	23	Moderate	s	p	Echigo et al 2012	2012	https://lpsn.dsmz.de/species/natribacillus-halophilus	Natribacillus	Bacillaceae	Caryophanales	Bacilli	Bacillota	Bacillati
Salinisphaera orenii	B	15	15	5	25	Moderate	s	p	Park et al 2012	2012	https://lpsn.dsmz.de/species/salinisphaera-orenii	Salinisphaera	Salinisphaeraceae	Nevskiales	Gammaproteobacteria	Pseudomonadota	Pseudomonadati
Salinisphaera halophila	B	14	19	6	29	Moderate	s	p	Zhang et al 2012	2012	https://lpsn.dsmz.de/species/salinisphaera-halophila	Salinisphaera	Salinisphaeraceae	Nevskiales	Gammaproteobacteria	Pseudomonadota	Pseudomonadati
Actibacterium mucosum	B			1.7	5	Slight	Salts	p	Lucena et al 2012	2012	https://lpsn.dsmz.de/species/actibacterium-mucosum	Actibacterium	Roseobacteraceae	Rhodobacterales	Alphaproteobacteria	Pseudomonadota	Pseudomonadati
Cytobacillus eiseniae	B			0	9	Tolerant	s	p	Hong et al 2012 / Patel and Gupta 2020	2012	https://lpsn.dsmz.de/species/cytobacillus-eiseniae	Cytobacillus	Cytobacillaceae	Caryophanales	Bacilli	Bacillota	Bacillati
Halomicrobium zhouii	A	2.6	2.6	1.4	5.1	No Class	s	m	Yang and Cui 2012	2012	https://lpsn.dsmz.de/species/halomicrobium-zhouii	Halomicrobium	Haloarculaceae	Halobacteriales	Halobacteria	Methanobacteriota	Methanobacteriati
Halopenitus persicus	A	3	3	1.7	4.3	Extreme	s	m	Amoozegar et al 2012	2012	https://lpsn.dsmz.de/species/halopenitus-persicus	Halopenitus	Haloferacaceae	Halobacteriales	Halobacteria	Methanobacteriota	Methanobacteriati
Halobellus salinus	A	3.4	3.4	2.6	5.1	No Class	s	m	Cui et al 2012	2012	https://lpsn.dsmz.de/species/halobellus-salinus	Halobellus	Haloferacaceae	Halobacteriales	Halobacteria	Methanobacteriota	Methanobacteriati
Haloarchaeobius iranensis	A	3.5	3.5	2	5	Extreme	s	p	Makhdoumi-Kakhki et al 2012	2012	https://lpsn.dsmz.de/species/haloarchaeobius-iranensis	Haloarchaeobius	Halobacteriaceae	Halobacteriales	Halobacteria	Methanobacteriota	Methanobacteriati
Halobellus limi	A	2.6	3.9	1.4	5.1	No Class	s	m	Cui et al 2012	2012	https://lpsn.dsmz.de/species/halobellus-limi	Halobellus	Haloferacaceae	Halobacteriales	Halobacteria	Methanobacteriota	Methanobacteriati
Halovenus aranensis	A	4	4	2.5	5	Extreme	s	m	Makhdoumi-Kakhki et al 2012	2012	https://lpsn.dsmz.de/species/halovenus-aranensis	Halovenus	Halobacteriaceae	Halobacteriales	Halobacteria	Methanobacteriota	Methanobacteriati
Citeromyces nyonsensis	E					Tolerant	s	p	Casaregola et al 2013	2013	-	Citeromyces	Saccharomycetaceae	Saccharomycetales	Saccharomycetes	Ascomycota	Fungi
Microbacterium sediminis	B	0	0	0	8	Tolerant	s	p	Yu et al 2013	2013	https://lpsn.dsmz.de/species/microbacterium-sediminis	Microbacterium	Microbacteriaceae	Micrococcales	Actinomycetes	Actinomycetota	Bacillati
Natranaerobaculum magadiense	B	1.2	1.4	0	1.55	Tolerant	s	m	Zavarzina et al 2013	2013	https://lpsn.dsmz.de/species/natranaerobaculum-magadiense	Natranaerobaculum	Natranaerobiaceae	Natranaerobiales	Clostridia	Bacillota	Bacillati
Albidovulum aestuarii	B	1	1.5	0	10	Moderate	s	p	Math et al 2013	2013	https://lpsn.dsmz.de/species/albidovulum-aestuarii	Albidovulum	Paracoccaceae	Rhodobacterales	Alphaproteobacteria	Pseudomonadota	Pseudomonadati
Arenibacter hampyeongensis	B	1	2	1	6	Tolerant	s	p	Jeong et al 2013	2013	https://lpsn.dsmz.de/species/arenibacter-hampyeongensis	Arenibacter	Flavobacteriaceae	Flavobacteriales	Flavobacteriia	Bacteroidota	Pseudomonadati
Desulfocurvus thunnarius	B	2	2	0	50	Tolerant	s	g	Hamdi et al 2013	2013	https://lpsn.dsmz.de/species/desulfocurvus-thunnarius	Desulfocurvus	Desulfovibrionaceae	Desulfovibrionales	Deltaproteobacteria	Pseudomonadota	Pseudomonadati
Endozoicomonas numazuensis	B	2	2	1	5	Slight	s	p	Nishjima et al 2013	2013	https://lpsn.dsmz.de/species/endozoicomonas-numazuensis	Endozoicomonas	Endozoicomonadaceae	Oceanospirillales	Gammaproteobacteria	Pseudomonadota	Pseudomonadati
Fonticella tunisiensis	B	0	2	0	4	Tolerant	s	p	Fraj et al 2013	2013	https://lpsn.dsmz.de/species/fonticella-tunisiensis	Fonticella	Clostridiaceae	Eubacteriales	Clostridia	Bacillota	Bacillati
Microbulbifer gwangyangensis	B	1	2	0	9	Tolerant	s	p	Jeong et al 2013	2013	https://lpsn.dsmz.de/species/microbulbifer-gwangyangensis	Microbulbifer	Microbulbiferaceae	Cellvibrionales	Gammaproteobacteria	Pseudomonadota	Pseudomonadati
Roseivirga pacifica	B	2	2	0.5	10	Moderate	s	p	Huo et al 2013	2013	https://lpsn.dsmz.de/species/roseivirga-pacifica	Roseivirga	Roseivirgaceae	Cytophagales	Cytophagia	Bacteroidota	Pseudomonadati
Mesobacillus persicus	B	2.5	2.5	0.5	10	Slight	s	p	Didari et al 2013	2013	https://lpsn.dsmz.de/species/mesobacillus-persicus	Mesobacillus	Cytobacillaceae	Caryophanales	Bacilli	Bacillota	Bacillati
Nesterenkonia suensis	B	2.5	2.5	0	18	Moderate	s	p	Govender et al 2013	2013	https://lpsn.dsmz.de/species/nesterenkonia-suensis	Nesterenkonia	Micrococcaceae	Micrococcales	Actinomycetes	Actinomycetota	Bacillati
Alcanivorax marinus	B	3	3	0.5	15	No Class	s	p	Lai et al 2013	2013	https://lpsn.dsmz.de/species/alcanivorax-marinus	Alcanivorax	Alcanivoracaceae	Oceanospirillales	Gammaproteobacteria	Pseudomonadota	Pseudomonadati
Galbibacter marinus	B	1	3	0	9	Moderate	s	p	Li et al 2013	2013	https://lpsn.dsmz.de/species/galbibacter-marinus	Galbibacter	Flavobacteriaceae	Flavobacteriales	Flavobacteriia	Bacteroidota	Pseudomonadati
Litchfieldia salsa	B	3	3	0.5	7.5	Slight	s	p	Amoozegar et al 2013	2013	https://lpsn.dsmz.de/species/litchfieldia-salsa	Litchfieldia	Bacillaceae	Caryophanales	Bacilli	Bacillota	Bacillati
Microbulbifer pacificus	B	2	3	1	7	Tolerant	s	p	Jeong et al 2013	2013	https://lpsn.dsmz.de/species/microbulbifer-pacificus	Microbulbifer	Microbulbiferaceae	Cellvibrionales	Gammaproteobacteria	Pseudomonadota	Pseudomonadati
Mongoliicoccus alkaliphilus	B	0	3	0	5	No Class	s	p	Subhash et al 2013	2013	https://lpsn.dsmz.de/species/mongoliicoccus-alkaliphilus	Mongoliicoccus	Cyclobacteriaceae	Cytophagales	Cytophagia	Bacteroidota	Pseudomonadati
Oceanobacillus polygoni	B	3	3	3	12	No Class	s	p	Hirota et al 2013	2013	https://lpsn.dsmz.de/species/oceanobacillus-polygoni	Oceanobacillus	Bacillaceae	Caryophanales	Bacilli	Bacillota	Bacillati
Limimonas halophila	B	3.4	3.4	2.5	5.2	Extreme	s	m	Amoozegar et al 2013	2013	https://lpsn.dsmz.de/species/limimonas-halophila	Limimonas	Rhodovibrionaceae	Rhodospirillales	Alphaproteobacteria	Pseudomonadota	Pseudomonadati
Amorphus suaedae	B	2	4	0	10	Slight	s	p	Hwang et al 2013	2013	https://lpsn.dsmz.de/species/amorphus-suaedae	Amorphus	Acuticoccaceae	Hyphomicrobiales	Alphaproteobacteria	Pseudomonadota	Pseudomonadati
Christiangramia aestuarii	B	2	4	1	11	Tolerant	s	p	Jeong et al 2013	2013	https://lpsn.dsmz.de/species/christiangramia-aestuarii	Christiangramia	Flavobacteriaceae	Flavobacteriales	Flavobacteriia	Bacteroidota	Pseudomonadati
Corallomonas stylophorae	B	3	4	0.5	7	No Class	s	p	Chen et al. 2013	2013	https://lpsn.dsmz.de/species/corallomonas-stylophorae	Corallomonas	Oceanospirillaceae	Oceanospirillales	Gammaproteobacteria	Pseudomonadota	Pseudomonadati
Flagellimonas taeanensis	B	2	4	1	8	Moderate	s	p	Kim et al 2013	2013	https://lpsn.dsmz.de/species/flagellimonas-taeanensis	Flagellimonas	Flavobacteriaceae	Flavobacteriales	Flavobacteriia	Bacteroidota	Pseudomonadati
Roseovarius lutimaris	B	2	4	1	6	Moderate	s	p	Choi et al 2013	2013	https://lpsn.dsmz.de/species/roseovarius-lutimaris	Roseovarius	Roseobacteraceae	Rhodobacterales	Alphaproteobacteria	Pseudomonadota	Pseudomonadati
Sinobacterium caligoides	B	2	4.5	1.5	4.5	Moderate	s	p	Su et al 2013	2013	https://lpsn.dsmz.de/species/sinobacterium-caligoides	Sinobacterium	Spongiibacteraceae	Cellvibrionales	Gammaproteobacteria	Pseudomonadota	Pseudomonadati
Alkalibacterium gilvum	B	2	5	0	17.5	Slight	s	p	Ishikawa et al. 2013	2013	https://lpsn.dsmz.de/species/alkalibacterium-gilvum	Alkalibacterium	Carnobacteriaceae	Lactobacillales	Bacilli	Bacillota	Bacillati
Cobetia amphilecti	B	5	5	0	20	Tolerant	s	p	Romanenko et al 2013	2013	https://lpsn.dsmz.de/species/cobetia-amphilecti	Cobetia	Halomonadaceae	Oceanospirillales	Gammaproteobacteria	Pseudomonadota	Pseudomonadati
Halomonas zincidurans	B	5	5	0.5	15	Moderate	s	p	Xu et al 2013	2013	https://lpsn.dsmz.de/species/halomonas-zincidurans	Halomonas	Halomonadaceae	Oceanospirillales	Gammaproteobacteria	Pseudomonadota	Pseudomonadati
Marinococcus tarijensis	B	5	5	3	20	Moderate	s	p	Balderrama-Subieta et al 2013	2013	https://lpsn.dsmz.de/species/marinococcus-tarijensis	Marinococcus	Bacillaceae	Caryophanales	Bacilli	Bacillota	Bacillati
Oceanobacillus indicireducens	B	5	5	0	10	No Class	s	p	Hirota et al 2013	2013	https://lpsn.dsmz.de/species/oceanobacillus-indicireducens	Oceanobacillus	Bacillaceae	Caryophanales	Bacilli	Bacillota	Bacillati
Phaeocystidibacter luteus	B	2	5	0.25	7.5	Moderate	s	p	Zhou et al 2013	2013	https://lpsn.dsmz.de/species/phaeocystidibacter-luteus	Phaeocystidibacter	Cryomorphaceae	Flavobacteriales	Flavobacteriia	Bacteroidota	Pseudomonadati
Profundibacterium mesophilum	B	2	6	0.5	20	Slight	s	p	Lai et al 2013	2013	https://lpsn.dsmz.de/species/profundibacterium-mesophilum	Profundibacterium	Roseobacteraceae	Rhodobacterales	Alphaproteobacteria	Pseudomonadota	Pseudomonadati
Alkalispirochaeta sphaeroplastigenens	B	5	7.5	0	12	No Class	s	p	Vishnuvardhan et al 2013	2013	https://lpsn.dsmz.de/species/alkalispirochaeta-sphaeroplastigenens	Alkalispirochaeta	Spirochaetaceae	Spirochaetales	Spirochaetia	Spirochaetota	Pseudomonadati
Ornithinibacillus halophilus	B	5	7.5	0.5	12.5	Moderate	s	p	Bagheri et al 2013	2013	https://lpsn.dsmz.de/species/ornithinibacillus-halophilus	Ornithinibacillus	Bacillaceae	Caryophanales	Bacilli	Bacillota	Bacillati
Saliterribacillus persicus	B	7.5	7.5	0.5	22.5	Moderate	s	p	Amoozegar et al 2013	2013	https://lpsn.dsmz.de/species/saliterribacillus-persicus	Saliterribacillus	Bacillaceae	Caryophanales	Bacilli	Bacillota	Bacillati
Celerinatantimonas yamalensis	B	6	8	2	12	Moderate	s	p	Shcherbakova et al 2013	2013	https://lpsn.dsmz.de/species/celerinatantimonas-yamalensis	Celerinatantimonas	Celerinatantimonadaceae	Alteromonadales	Gammaproteobacteria	Pseudomonadota	Pseudomonadati
Streptomyces chilikensis	B	8	8	2	12	No Class	s	p	Ray et al 2013	2013	https://lpsn.dsmz.de/species/streptomyces-chilikensis	Streptomyces	Streptomycetaceae	Kitasatosporales	Actinomycetes	Actinomycetota	Bacillati
Gracilimonas mengyeensis	B	5	9	2	15	Moderate	s	p	Wang et al 2013	2013	https://lpsn.dsmz.de/species/gracilimonas-mengyeensis	Gracilimonas	Balneolaceae	Balneolales	Balneolia	Balneolota	Pseudomonadati
Fodinibius roseus	B	6	10	4	20	Moderate	s	p	Wang et al 2013	2013	https://lpsn.dsmz.de/species/fodinibius-roseus	Fodinibius	Balneolaceae	Balneolales	Balneolia	Balneolota	Pseudomonadati
Fodinibius sediminis	B	6	10	4	16	Moderate	s	p	Wang et al 2013	2013	https://lpsn.dsmz.de/species/fodinibius-sediminis	Fodinibius	Balneolaceae	Balneolales	Balneolia	Balneolota	Pseudomonadati
Halomonas smyrnensis	B	10	10	3	25	Moderate	s	p	Poli et al 2013	2013	https://lpsn.dsmz.de/species/halomonas-smyrnensis	Halomonas	Halomonadaceae	Oceanospirillales	Gammaproteobacteria	Pseudomonadota	Pseudomonadati
Salinisphaera japonica	B	7.5	10	1	30	Moderate	s	p	Shimane et al 2013	2013	https://lpsn.dsmz.de/species/salinisphaera-japonica	Salinisphaera	Salinisphaeraceae	Nevskiales	Gammaproteobacteria	Pseudomonadota	Pseudomonadati
Actinopolyspora lacussalsi	B	12	12	10	20	Extreme	s	p	Guan et al 2013	2013	https://lpsn.dsmz.de/species/actinopolyspora-lacussalsi	Actinopolyspora	Pseudonocardiaceae	Pseudonocardiales	Actinomycetes	Actinomycetota	Bacillati
Metabacillus halosaccharovorans	B	5	15	0.5	25	Moderate	s	p	Mehrshad et al 2013	2013	https://lpsn.dsmz.de/species/metabacillus-halosaccharovorans	Metabacillus	Bacillaceae	Caryophanales	Bacilli	Bacillota	Bacillati
Texcoconibacillus texcoconensis	B	9	16	0	26	Tolerant	s	p	Ruiz-Romero et al 2013	2013	https://lpsn.dsmz.de/species/texcoconibacillus-texcoconensis	Texcoconibacillus	Bacillaceae	Caryophanales	Bacilli	Bacillota	Bacillati
Halanaerobium sehlinense	B	20	20	5	30	Extreme	s	p	Abdeljabbar et al 2013	2013	https://lpsn.dsmz.de/species/halanaerobium-sehlinense	Halanaerobium	Halanaerobiaceae	Halanaerobiales	Clostridia	Bacillota	Bacillati
Actinopolyspora mzabensis	B	10	28	7	32	No Class	s	p	Meklat et al. 2013	2013	https://lpsn.dsmz.de/species/actinopolyspora-mzabensis	Actinopolyspora	Pseudonocardiaceae	Pseudonocardiales	Actinomycetes	Actinomycetota	Bacillati
Glycocaulis abyssi	B	20	60		100	Moderate	s	g	Abraham et al 2013	2013	https://lpsn.dsmz.de/species/glycocaulis-abyssi	Glycocaulis	Maricaulaceae	Caulobacterales	Alphaproteobacteria	Pseudomonadota	Pseudomonadati
Amycolatopsis cihanbeyliensis	B			0	10	Tolerant	s	p	Tatar et al 2013	2013	https://lpsn.dsmz.de/species/amycolatopsis-cihanbeyliensis	Amycolatopsis	Pseudonocardiaceae	Pseudonocardiales	Actinomycetes	Actinomycetota	Bacillati
Melghirimyces thermohalophilus	B			5	20	Moderate	s	p	Addou et al 2013	2013	https://lpsn.dsmz.de/species/melghirimyces-thermohalophilus	Melghirimyces	Thermoactinomycetaceae	Caryophanales	Bacilli	Bacillota	Bacillati
Halolamina salina	A	3.4	3.4	1.9	5.4	Extreme	s	m	Zhang et al 2013	2013	https://lpsn.dsmz.de/species/halolamina-salina	Halolamina	Haloferacaceae	Halobacteriales	Halobacteria	Methanobacteriota	Methanobacteriati
Natrinema salifodinae	A	2.9	3.4	1.9	5.4	Extreme	s	m	Zhang et al 2013	2013	https://lpsn.dsmz.de/species/natrinema-salifodinae	Natrinema	Natrialbaceae	Halobacteriales	Halobacteria	Methanobacteriota	Methanobacteriati
Natronobacterium texcoconense	A	2.6	3.4	1.7	4.3	No Class	s	m	Ruiz-Romero et al 2013	2013	https://lpsn.dsmz.de/species/natronobacterium-texcoconense	Natronobacterium	Natrialbaceae	Halobacteriales	Halobacteria	Methanobacteriota	Methanobacteriati
Halopelagius longus	A	3	3.5	1.8	6	Extreme	s	m	Zhang et al 2013	2013	https://lpsn.dsmz.de/species/halopelagius-longus	Halopelagius	Haloferacaceae	Halobacteriales	Halobacteria	Methanobacteriota	Methanobacteriati
Halopenitus malekzadehii	A	3.5	3.5	1.7	5	Extreme	s	m	Amoozegar et al 2013	2013	https://lpsn.dsmz.de/species/halopenitus-malekzadehii	Halopenitus	Haloferacaceae	Halobacteriales	Halobacteria	Methanobacteriota	Methanobacteriati
Halolamina salifodinae	A	3.4	3.9	1.6	5.4	Extreme	s	m	Zhang et al 2013	2013	https://lpsn.dsmz.de/species/halolamina-salifodinae	Halolamina	Haloferacaceae	Halobacteriales	Halobacteria	Methanobacteriota	Methanobacteriati
Halobaculum magnesiiphilum	A	9	12	6	30	Extreme	s	p	Shimoshige et al 2013	2013	https://lpsn.dsmz.de/species/halobaculum-magnesiiphilum	Halobaculum	Haloferacaceae	Halobacteriales	Halobacteria	Methanobacteriota	Methanobacteriati
Halarchaeum rubridurum	A	18	18	9	30	No Class	s	p	Yamauchi et al 2013	2013	https://lpsn.dsmz.de/species/halarchaeum-rubridurum	Halarchaeum	Halobacteriaceae	Halobacteriales	Halobacteria	Methanobacteriota	Methanobacteriati
Halarchaeum salinum	A	18	18	12	30	Moderate	s	p	Yamauchi et al 2013	2013	https://lpsn.dsmz.de/species/halarchaeum-salinum	Halarchaeum	Halobacteriaceae	Halobacteriales	Halobacteria	Methanobacteriota	Methanobacteriati
Natronoarchaeum philippinense	A	18	18	14	30	No Class	s	p	Shimane et al 2013	2013	https://lpsn.dsmz.de/species/natronoarchaeum-philippinense	Natronoarchaeum	Natronoarchaeaceae	Halobacteriales	Halobacteria	Methanobacteriota	Methanobacteriati
Halarchaeum nitratireducens	A	21	21	9	30	No Class	s	p	Minegishi et al 2013	2013	https://lpsn.dsmz.de/species/halarchaeum-nitratireducens	Halarchaeum	Halobacteriaceae	Halobacteriales	Halobacteria	Methanobacteriota	Methanobacteriati
Haloarcula pellucida	A	25	25	20	30	Extreme	s	p	Echigo et al 2013	2013	https://lpsn.dsmz.de/species/haloarcula-pellucida	Haloarcula	Haloarculaceae	Halobacteriales	Halobacteria	Methanobacteriota	Methanobacteriati
Halopelagius fulvigenes	A	20	25	10	30	Extreme	s	p	Liu et al 2013	2013	https://lpsn.dsmz.de/species/halopelagius-fulvigenes	Halopelagius	Haloferacaceae	Halobacteriales	Halobacteria	Methanobacteriota	Methanobacteriati
Natronococcus roseus	A	25	30	15	30	No Class	s	p	Corral et al 2013	2013	https://lpsn.dsmz.de/species/natronococcus-roseus	Natronococcus	Natrialbaceae	Halobacteriales	Halobacteria	Methanobacteriota	Methanobacteriati
Halobellus inordinatus	A	180	180	100	280	No Class	s	g	Qiu et al 2013	2013	https://lpsn.dsmz.de/species/halobellus-inordinatus	Halobellus	Haloferacaceae	Halobacteriales	Halobacteria	Methanobacteriota	Methanobacteriati
Thermoflavifilum aggregans	B	0.1	0.25	0	5	Slight	s	p	Anders et al 2014	2014	https://lpsn.dsmz.de/species/thermoflavifilum-aggregans	Thermoflavifilum	Chitinophagaceae	Chitinophagales	Chitinophagia	Bacteroidota	Pseudomonadati
Neobacillus mesonae	B	1	1	0	2	Tolerant	s	p	Liu et al 2014	2014	https://lpsn.dsmz.de/species/neobacillus-mesonae	Neobacillus	Cytobacillaceae	Caryophanales	Bacilli	Bacillota	Bacillati
Mobilitalea sibirica	B	1.5	1.5	0	8.5	Tolerant	s	p	Podosokorskaya et al 2014	2014	https://lpsn.dsmz.de/species/mobilitalea-sibirica	Mobilitalea	Lachnospiraceae	Eubacteriales	Clostridia	Bacillota	Bacillati
Cellulomonas pakistanensis	B	1	2	0	12	Tolerant	s	p	Ahmed et al 2014	2014	https://lpsn.dsmz.de/species/cellulomonas-pakistanensis	Cellulomonas	Cellulomonadaceae	Micrococcales	Actinomycetes	Actinomycetota	Bacillati
Halalkalibacterium ligniniphilum	B	2	2	0	10	Tolerant	s	p	Zhu et al 2014	2014	https://lpsn.dsmz.de/species/halalkalibacterium-ligniniphilum	Halalkalibacterium	Bacillaceae	Caryophanales	Bacilli	Bacillota	Bacillati
Mariniphaga anaerophila	B	1	2	0	9	Moderate	s	p	Iino et al 2014	2014	https://lpsn.dsmz.de/species/mariniphaga-anaerophila	Mariniphaga	Prolixibacteraceae	Bacteroidales	Bacteroidia	Bacteroidota	Pseudomonadati
Pseudooceanicola flagellatus	B	2	2	0.5	7.5	Moderate	s	p	Huo et al 2014	2014	https://lpsn.dsmz.de/species/pseudooceanicola-flagellatus	Pseudooceanicola	Roseobacteraceae	Rhodobacterales	Alphaproteobacteria	Pseudomonadota	Pseudomonadati
Chryseobacterium artocarpi	B	3	3	0	6	Tolerant	s	p	Venil et al 2014	2014	https://lpsn.dsmz.de/species/chryseobacterium-artocarpi	Chryseobacterium	Weeksellaceae	Flavobacteriales	Flavobacteriia	Bacteroidota	Pseudomonadati
Cyclobacterium xiamenense	B	2.5	3	1	10	Slight	s	p	Shahinpei et al 2014 / Chen et al 2014	2014	https://lpsn.dsmz.de/species/cyclobacterium-xiamenense	Cyclobacterium	Cyclobacteriaceae	Cytophagales	Cytophagia	Bacteroidota	Pseudomonadati
Glycocaulis albus	B	1	3	1	5	Moderate	s	p	Lv et al 2014	2014	https://lpsn.dsmz.de/species/glycocaulis-albus	Glycocaulis	Maricaulaceae	Caulobacterales	Alphaproteobacteria	Pseudomonadota	Pseudomonadati
Gracilibacillus alcaliphilus	B	3	3	0	15	No Class	s	p	Hirota et al 2014	2014	https://lpsn.dsmz.de/species/gracilibacillus-alcaliphilus	Gracilibacillus	Bacillaceae	Caryophanales	Bacilli	Bacillota	Bacillati
Halopseudomonas salegens	B	3	3	1	10	Slight	s	p	Amoozegar et al 2014	2014	https://lpsn.dsmz.de/species/halopseudomonas-salegens	Halopseudomonas	Pseudomonadaceae	Pseudomonadales	Gammaproteobacteria	Pseudomonadota	Pseudomonadati
Lysinibacillus halotolerans	B	3	3	0	10	Tolerant	s	p	Kong et al 2014	2014	https://lpsn.dsmz.de/species/lysinibacillus-halotolerans	Lysinibacillus	Caryophanaceae	Caryophanales	Bacilli	Bacillota	Bacillati
Photobacterium aestuarii	B	2	3	1	6	Slight	s	p	Lo et al 2014	2014	https://lpsn.dsmz.de/species/photobacterium-aestuarii	Photobacterium	Vibrionaceae	Vibrionales	Gammaproteobacteria	Pseudomonadota	Pseudomonadati
Pseudooceanicola antarcticus	B	0.5	3	0.5	10	Moderate	s	p	Huo et al 2014	2014	https://lpsn.dsmz.de/species/pseudooceanicola-antarcticus	Pseudooceanicola	Roseobacteraceae	Rhodobacterales	Alphaproteobacteria	Pseudomonadota	Pseudomonadati
Salinispirillum marinum	B	3	3	1	10	No Class	s	p	Shahinpei et al 2014	2014	https://lpsn.dsmz.de/species/salinispirillum-marinum	Salinispirillum	Natronospirillaceae	Oceanospirillales	Gammaproteobacteria	Pseudomonadota	Pseudomonadati
Sulfitobacter porphyrae	B	2	3	1	9	No Class	s	p	Fukui et al 2014	2014	https://lpsn.dsmz.de/species/sulfitobacter-porphyrae	Sulfitobacter	Roseobacteraceae	Rhodobacterales	Alphaproteobacteria	Pseudomonadota	Pseudomonadati
Vallitalea pronyensis	B	2.5	3	0.5	6	Slight	s	p	Aissa et al 2014	2014	https://lpsn.dsmz.de/species/vallitalea-pronyensis	Vallitalea	Vallitaleaceae	Eubacteriales	Clostridia	Bacillota	Bacillati
Zunongwangia mangrovi	B	2	3	0.3	12	Slight	s	p	Raneshkumar et al 2014	2014	https://lpsn.dsmz.de/species/zunongwangia-mangrovi	Zunongwangia	Flavobacteriaceae	Flavobacteriales	Flavobacteriia	Bacteroidota	Pseudomonadati
Halomonas songnenensis	B	4	4	0.2	15	Moderate	s	p	Jiang et al 2014	2014	https://lpsn.dsmz.de/species/halomonas-songnenensis	Halomonas	Halomonadaceae	Oceanospirillales	Gammaproteobacteria	Pseudomonadota	Pseudomonadati
Oceanobacillus pacificus	B	4	4	0	14	Moderate	s	p	Yu et al 2014	2014	https://lpsn.dsmz.de/species/oceanobacillus-pacificus	Oceanobacillus	Bacillaceae	Caryophanales	Bacilli	Bacillota	Bacillati
Haloactinopolyspora alkaliphila	B	2.5	5	0	12.5	Tolerant	s	p	Zhang et al 2014	2014	https://lpsn.dsmz.de/species/haloactinopolyspora-alkaliphila	Haloactinopolyspora	Jiangellaceae	Jiangellales	Actinomycetes	Actinomycetota	Bacillati
Salinithrix halophila	B	3	5	1	15	No Class	s	p	Zarparvar et al 2014	2014	https://lpsn.dsmz.de/species/salinithrix-halophila	Salinithrix	Thermoactinomycetaceae	Caryophanales	Bacilli	Bacillota	Bacillati
Halomonas olivaria	B	7	7	0	25	Moderate	s	p	Amouric et al 2014	2014	https://lpsn.dsmz.de/species/halomonas-olivaria	Halomonas	Halomonadaceae	Oceanospirillales	Gammaproteobacteria	Pseudomonadota	Pseudomonadati
Tranquillimonas rosea	B	5	7	3	15	Tolerant	s	p	Zhang et al 2014	2014	https://lpsn.dsmz.de/species/tranquillimonas-rosea	Tranquillimonas	Roseobacteraceae	Rhodobacterales	Alphaproteobacteria	Pseudomonadota	Pseudomonadati
Aliicoccus persicus	B	7.5	7.5	0.5	12.5	Moderate	s	p	Amoozegar et al 2014	2014	https://lpsn.dsmz.de/species/aliicoccus-persicus	Aliicoccus	Staphylococcaceae	Caryophanales	Bacilli	Bacillota	Bacillati
Oceanobacillus limi	B	7.5	7.5	2.5	10	Moderate	s	p	Amoozegar et al 2014	2014	https://lpsn.dsmz.de/species/oceanobacillus-limi	Oceanobacillus	Bacillaceae	Caryophanales	Bacilli	Bacillota	Bacillati
Rhodovulum mangrovi	B	1	9	0	12	No Class	s	p	Nupur et al 2014	2014	https://lpsn.dsmz.de/species/rhodovulum-mangrovi	Rhodovulum	Roseobacteraceae	Rhodobacterales	Alphaproteobacteria	Pseudomonadota	Pseudomonadati
Aliidiomarina shirensis	B	1	10	0.5	15	No Class	s	p	Chiu et al 2014	2014	https://lpsn.dsmz.de/species/aliidiomarina-shirensis	Aliidiomarina	Idiomarinaceae	Alteromonadales	Gammaproteobacteria	Pseudomonadota	Pseudomonadati
Aquibacillus halophilus	B	10	10	0.5	20	Moderate	s	p	Amoozegar et al. 2014	2014	https://lpsn.dsmz.de/species/aquibacillus-halophilus	Aquibacillus	Bacillaceae	Caryophanales	Bacilli	Bacillota	Bacillati
Halomonas huangheensis	B	7	10	1	20	Moderate	s	p	Miao et al 2014	2014	https://lpsn.dsmz.de/species/halomonas-huangheensis	Halomonas	Halomonadaceae	Oceanospirillales	Gammaproteobacteria	Pseudomonadota	Pseudomonadati
Saccharopolyspora halotolerans	B	10	10	3	20	No Class	s	p	Lv et al 2014	2014	https://lpsn.dsmz.de/species/saccharopolyspora-halotolerans	Saccharopolyspora	Pseudonocardiaceae	Pseudonocardiales	Actinomycetes	Actinomycetota	Bacillati
Aquisalimonas halophila	B	10	11	3	23	Moderate	s	p	Zhang et al 2014	2014	https://lpsn.dsmz.de/species/aquisalimonas-halophila	Aquisalimonas	Ectothiorhodospiraceae	Chromatiales	Gammaproteobacteria	Pseudomonadota	Pseudomonadati
Salinibacillus xinjiangensis	B	9	12	1	21	No Class	s	p	Yang et al 2014	2014	https://lpsn.dsmz.de/species/salinibacillus-xinjiangensis	Salinibacillus	Bacillaceae	Caryophanales	Bacilli	Bacillota	Bacillati
Alkalibacillus almallahensis	B	15	15	7.5	30	No Class	Total salts	p	Pérez-Davó et al 2014	2014	https://lpsn.dsmz.de/species/alkalibacillus-almallahensis	Alkalibacillus	Bacillaceae	Caryophanales	Bacilli	Bacillota	Bacillati
Halopolyspora alba	B	20	20	10	35	No Class	Multi-salts	p	Lai et al 2014	2014	https://lpsn.dsmz.de/species/halopolyspora-alba	Halopolyspora	Pseudonocardiaceae	Pseudonocardiales	Actinomycetes	Actinomycetota	Bacillati
Jeotgalibaca dankookensis	B			0.5	9	Tolerant	s	p	Lee et al 2014	2014	https://lpsn.dsmz.de/species/jeotgalibaca-dankookensis	Jeotgalibaca	Carnobacteriaceae	Lactobacillales	Bacilli	Bacillota	Bacillati
Psychroflexus salarius	B			1	10	Moderate	s	p	Chun et al 2014	2014	https://lpsn.dsmz.de/species/psychroflexus-salarius	Psychroflexus	Flavobacteriaceae	Flavobacteriales	Flavobacteriia	Bacteroidota	Pseudomonadati
Rossellomorea oryzaecorticis	B			0	9	Moderate	s	p	Hong et al 2014	2014	https://lpsn.dsmz.de/species/rossellomorea-oryzaecorticis	Rossellomorea	Bacillaceae	Caryophanales	Bacilli	Bacillota	Bacillati
Streptomyces iconiensis	B					Tolerant	s	p	Tatar et al 2014	2014	https://lpsn.dsmz.de/species/streptomyces-iconiensis	Streptomyces	Streptomycetaceae	Kitasatosporales	Actinomycetes	Actinomycetota	Bacillati
Streptomyces smyrnaeus	B					Tolerant	s	p	Tatar et al 2014	2014	https://lpsn.dsmz.de/species/streptomyces-smyrnaeus	Streptomyces	Streptomycetaceae	Kitasatosporales	Actinomycetes	Actinomycetota	Bacillati
Methanohalophilus levihalophilus	A	0.35	0.4	0.2	1.3	Slight	s	m	Katayama et al 2014	2014	https://lpsn.dsmz.de/species/methanohalophilus-levihalophilus	Methanohalophilus	Methanosarcinaceae	Methanosarcinales	Methanosarcinia	Methanobacteriota	Methanobacteriati
Methanococcoides vulcani	A	0.5	0.5			No Class	Na+	m	L'Haridon et al 2014	2014	https://lpsn.dsmz.de/species/methanococcoides-vulcani	Methanococcoides	Methanosarcinaceae	Methanosarcinales	Methanosarcinia	Methanobacteriota	Methanobacteriati
Haloarcula limicola	A	2.1	2.1	0.9	4.8	No Class	s	m	Zhang and Cui 2014	2014	https://lpsn.dsmz.de/species/haloarcula-limicola	Haloarcula	Haloarculaceae	Halobacteriales	Halobacteria	Methanobacteriota	Methanobacteriati
Natronoarchaeum rubrum	A	2.6	2.6	1.4	4.8	No Class	s	m	Qiu et al 2014	2014	https://lpsn.dsmz.de/species/natronoarchaeum-rubrum	Natronoarchaeum	Natronoarchaeaceae	Halobacteriales	Halobacteria	Methanobacteriota	Methanobacteriati
Halosimplex rubrum	A	3.1	3.1	0.9	3.4	Extreme	s	m	Han and Cui 2014	2014	https://lpsn.dsmz.de/species/halosimplex-rubrum	Halosimplex	Haloarculaceae	Halobacteriales	Halobacteria	Methanobacteriota	Methanobacteriati
Salinigranum rubrum	A	3.1	3.1	1.4	4.8	Extreme	s	m	Cui and Zhang 2014	2014	https://lpsn.dsmz.de/species/salinigranum-rubrum	Salinigranum	Haloferacaceae	Halobacteriales	Halobacteria	Methanobacteriota	Methanobacteriati
Halosimplex pelagicum	A	3.4	3.4	1.4	4.8	Extreme	s	m	Han and Cui 2014	2014	https://lpsn.dsmz.de/species/halosimplex-pelagicum	Halosimplex	Haloarculaceae	Halobacteriales	Halobacteria	Methanobacteriota	Methanobacteriati
Halorientalis persica	A	4.3	4.3	2.5	5	Extreme	s	m	Amoozegar et al 2014	2014	https://lpsn.dsmz.de/species/halorientalis-persica	Halorientalis	Haloarculaceae	Halobacteriales	Halobacteria	Methanobacteriota	Methanobacteriati
Halovivax limisalsi	A	4.3	4.3	2.5	5.1	Extreme	s	m	Amoozegar et al 2014	2014	https://lpsn.dsmz.de/species/halovivax-limisalsi	Halovivax	Natrialbaceae	Halobacteriales	Halobacteria	Methanobacteriota	Methanobacteriati
Methylobrevis pamukkalensis	B	0.085	0.085	0	1	Tolerant	s	m	Poroshina et al 2015	2015	https://lpsn.dsmz.de/species/methylobrevis-pamukkalensis	Methylobrevis	Pleomorphomonadaceae	Hyphomicrobiales	Alphaproteobacteria	Pseudomonadota	Pseudomonadati
Paenibacillus ripae	B	0.5	0.5	0	6	Tolerant	s	p	Sun et al 2015	2015	https://lpsn.dsmz.de/species/paenibacillus-ripae	Paenibacillus	Paenibacillaceae	Caryophanales	Bacilli	Bacillota	Bacillati
Alkalispirochaeta odontotermitis	B	1	1	0	10	Tolerant	s	p	Sravanthi et al 2015	2015	https://lpsn.dsmz.de/species/alkalispirochaeta-odontotermitis	Alkalispirochaeta	Spirochaetaceae	Spirochaetales	Spirochaetia	Spirochaetota	Pseudomonadati
Nesterenkonia alkaliphila	B	1	1	0	12	Tolerant	s	p	Zhang et al 2015	2015	https://lpsn.dsmz.de/species/nesterenkonia-alkaliphila	Nesterenkonia	Micrococcaceae	Micrococcales	Actinomycetes	Actinomycetota	Bacillati
Fuchsiella ferrireducens	B	1.2	1.2	0.2	2.7	No Class	s	m	Zhilina et al 2015	2015	https://lpsn.dsmz.de/species/fuchsiella-ferrireducens	Fuchsiella	Halobacteroidaceae	Halanaerobiales	Clostridia	Bacillota	Bacillati
Actibacterium naphthalenivorans	B	2	2	1	5	Moderate	s	p	Jeong et al 2015	2015	https://lpsn.dsmz.de/species/actibacterium-naphthalenivorans	Actibacterium	Roseobacteraceae	Rhodobacterales	Alphaproteobacteria	Pseudomonadota	Pseudomonadati
Aliiglaciecola aliphaticivorans	B	2	2	1	9	Slight	s	p	Jin et al 2015	2015	https://lpsn.dsmz.de/species/aliiglaciecola-aliphaticivorans	Aliiglaciecola	Alteromonadaceae	Alteromonadales	Gammaproteobacteria	Pseudomonadota	Pseudomonadati
Alteromonas naphthalenivorans	B	2	2	0.5	9	Tolerant	s	p	Jin et al 2015	2015	https://lpsn.dsmz.de/species/alteromonas-naphthalenivorans	Alteromonas	Alteromonadaceae	Alteromonadales	Gammaproteobacteria	Pseudomonadota	Pseudomonadati
Aminobacterium thunnarium	B	2	2	1	5	Slight	s	p	Hamdi et al 2015	2015	https://lpsn.dsmz.de/species/aminobacterium-thunnarium	Aminobacterium	Synergistaceae	Synergistales	Synergistia	Synergistota	Thermotogati
Lederbergia wuyishanensis	B	2	2	0	6	Moderate	s	p	Liu et al 2015	2015	https://lpsn.dsmz.de/species/lederbergia-wuyishanensis	Lederbergia	Bacillaceae	Caryophanales	Bacilli	Bacillota	Bacillati
Limibacillus halophilus	B	2	2	0	5	Moderate	s	p	Kim et al 2015	2015	https://lpsn.dsmz.de/species/limibacillus-halophilus	Limibacillus	Rhodovibrionaceae	Rhodospirillales	Alphaproteobacteria	Pseudomonadota	Pseudomonadati
Marinobacter nitratireducens	B	2	2	0.5	6	No Class	s	p	Vaidya et al 2015	2015	https://lpsn.dsmz.de/species/marinobacter-nitratireducens	Marinobacter	Alteromonadaceae	Alteromonadales	Gammaproteobacteria	Pseudomonadota	Pseudomonadati
Oceanobacillus arenosus	B	2	2	0	8	Moderate	s	p	Kim et al 2015	2015	https://lpsn.dsmz.de/species/oceanobacillus-arenosus	Oceanobacillus	Bacillaceae	Caryophanales	Bacilli	Bacillota	Bacillati
Prolixibacter denitrificans	B	2	2	1	13	Moderate	s	p	Iino et al 2015	2015	https://lpsn.dsmz.de/species/prolixibacter-denitrificans	Prolixibacter	Prolixibacteraceae	Bacteroidales	Bacteroidia	Bacteroidota	Pseudomonadati
Robertmurraya crescens	B	0	2	0	5	Tolerant	s	p	Shivani et al 2015	2015	https://lpsn.dsmz.de/species/robertmurraya-crescens	Robertmurraya	Cytobacillaceae	Caryophanales	Bacilli	Bacillota	Bacillati
Roseovarius aquimarinus	B	2	2	1	13	Slight	s	p	Kang et al 2015	2015	https://lpsn.dsmz.de/species/roseovarius-aquimarinus	Roseovarius	Roseobacteraceae	Rhodobacterales	Alphaproteobacteria	Pseudomonadota	Pseudomonadati
Alcanivorax gelatiniphagus	B	1.5	3	0.5	16	No Class	s	p	Kwon et al 2015	2015	https://lpsn.dsmz.de/species/alcanivorax-gelatiniphagus	Alcanivorax	Alcanivoracaceae	Oceanospirillales	Gammaproteobacteria	Pseudomonadota	Pseudomonadati
Celeribacter naphthalenivorans	B	2	3	1	7	Moderate	s	p	Oh et al 2015	2015	https://lpsn.dsmz.de/species/celeribacter-naphthalenivorans	Celeribacter	Roseobacteraceae	Rhodobacterales	Alphaproteobacteria	Pseudomonadota	Pseudomonadati
Desulfovibrio biadhensis	B	3	3	0.5	8	Slight	s	p	Fadlaoui et al 2015	2015	https://lpsn.dsmz.de/species/desulfovibrio-biadhensis	Desulfovibrio	Desulfovibrionaceae	Desulfovibrionales	Deltaproteobacteria	Pseudomonadota	Pseudomonadati
Halotia wernerae	B	1	3	1	10	Slight	s	p	Genuário et al 2015	2015	https://lpsn.dsmz.de/species/halotia-wernerae	Halotia	Nodulariaceae	Nostocales	Cyanophyceae	Cyanobacteriota	Bacillati
Maribacter flavus	B	2	3	1	7	No Class	s	p	Tang et al 2015	2015	https://lpsn.dsmz.de/species/maribacter-flavus	Maribacter	Flavobacteriaceae	Flavobacteriales	Flavobacteriia	Bacteroidota	Pseudomonadati
Myceligenerans cantabricum	B	0.5	3	0.5	10.5	Tolerant	s	p	Sarmiento-Vizcaíno et al 2015	2015	https://lpsn.dsmz.de/species/myceligenerans-cantabricum	Myceligenerans	Promicromonosporaceae	Micrococcales	Actinomycetes	Actinomycetota	Bacillati
Nocardia halotolerans	B	0	3	0	12.5	Tolerant	s	p	Nikou et al 2015	2015	https://lpsn.dsmz.de/species/nocardia-halotolerans	Nocardia	Nocardiaceae	Mycobacteriales	Actinomycetes	Actinomycetota	Bacillati
Nocardiopsis oceani	B	0	3	0	8	Moderate	s	p	Pan et al 2015	2015	https://lpsn.dsmz.de/species/nocardiopsis-oceani	Nocardiopsis	Nocardiopsidaceae	Streptosporangiales	Actinomycetes	Actinomycetota	Bacillati
Palleronia soli	B	3	3	1	11	Moderate	Sea salt	p	Kim et al 2015	2015	https://lpsn.dsmz.de/species/palleronia-soli	Palleronia	Roseobacteraceae	Rhodobacterales	Alphaproteobacteria	Pseudomonadota	Pseudomonadati
Pseudidiomarina halophila	B	2	3	0.5	11	Slight	s	p	Lee et al 2015	2015	https://lpsn.dsmz.de/species/pseudidiomarina-halophila	Pseudidiomarina	Idiomarinaceae	Alteromonadales	Gammaproteobacteria	Pseudomonadota	Pseudomonadati
Thiogranum longum	B	3	3	1	5	Slight	s	p	Mori et al 2015	2015	https://lpsn.dsmz.de/species/thiogranum-longum	Thiogranum	Ectothiorhodospiraceae	Chromatiales	Gammaproteobacteria	Pseudomonadota	Pseudomonadati
Virgibacillus oceani	B	3.5	3.5	0.5	18	Moderate	s	p	Yin et al 2015	2015	https://lpsn.dsmz.de/species/virgibacillus-oceani	Virgibacillus	Bacillaceae	Caryophanales	Bacilli	Bacillota	Bacillati
Gynuella sunshinyii	B	1	4	1	7	Moderate	s	p	Chung et al 2015	2015	https://lpsn.dsmz.de/species/gynuella-sunshinyii	Gynuella	Gynuellaceae	Oceanospirillales	Gammaproteobacteria	Pseudomonadota	Pseudomonadati
Nocardiopsis nanhaiensis	B	1	4	0	7	Moderate	s	p	Pan et al 2015	2015	https://lpsn.dsmz.de/species/nocardiopsis-nanhaiensis	Nocardiopsis	Nocardiopsidaceae	Streptosporangiales	Actinomycetes	Actinomycetota	Bacillati
Thiorhodococcus fuscus	B	2	4	0.5	7	Moderate	s	p	Lakshmi et al 2015	2015	https://lpsn.dsmz.de/species/thiorhodococcus-fuscus	Thiorhodococcus	Chromatiaceae	Chromatiales	Gammaproteobacteria	Pseudomonadota	Pseudomonadati
Zhihengliuella somnathii	B	4	4	0.5	15	Tolerant	s	p	Jha et al 2015	2015	https://lpsn.dsmz.de/species/zhihengliuella-somnathii	Zhihengliuella	Micrococcaceae	Micrococcales	Actinomycetes	Actinomycetota	Bacillati
Acetoanaerobium pronyense	B	5	5	0	70	Tolerant	s	g	Bes et al 2015	2015	https://lpsn.dsmz.de/species/acetoanaerobium-pronyense	Acetoanaerobium	Peptostreptococcaceae	Eubacteriales	Clostridia	Bacillota	Bacillati
Actinoalloteichus hoggarensis	B	5	5	3	7	Moderate	s	p	Boudjelal et al 2015	2015	https://lpsn.dsmz.de/species/actinoalloteichus-hoggarensis	Actinoalloteichus	Pseudonocardiaceae	Pseudonocardiales	Actinomycetes	Actinomycetota	Bacillati
Fusibacter bizertensis	B	5	5	0	50	Tolerant	s	g	Smii et al 2015	2015	https://lpsn.dsmz.de/species/fusibacter-bizertensis	Fusibacter	Incertae sedis	Eubacteriales	Clostridia	Bacillota	Bacillati
Winogradskyella litoriviva	B	4	5	0.5	7	Moderate	s	p	Nedashkovskaya et al 2015	2015	https://lpsn.dsmz.de/species/winogradskyella-litoriviva	Winogradskyella	Flavobacteriaceae	Flavobacteriales	Flavobacteriia	Bacteroidota	Pseudomonadati
Garicola koreensis	B	6	6	1	17	Moderate	s	p	Lo et al 2015	2015	https://lpsn.dsmz.de/species/garicola-koreensis	Garicola	Micrococcaceae	Micrococcales	Actinomycetes	Actinomycetota	Bacillati
Mesobacillus rigiliprofundi	B	5	6	0	12	Moderate	s	p	Sylvan et al 2015	2015	https://lpsn.dsmz.de/species/mesobacillus-rigiliprofundi	Mesobacillus	Cytobacillaceae	Caryophanales	Bacilli	Bacillota	Bacillati
Oleiagrimonas soli	B	1.5	6	0.5	10	No Class	s	p	Fang et al 2015	2015	https://lpsn.dsmz.de/species/oleiagrimonas-soli	Oleiagrimonas	Rhodanobacteraceae	Lysobacterales	Gammaproteobacteria	Pseudomonadota	Pseudomonadati
Salipiger profundus	B	6	6	0	19	Moderate	s	p	Dai et al 2015	2015	https://lpsn.dsmz.de/species/salipiger-profundus	Salipiger	Roseobacteraceae	Rhodobacterales	Alphaproteobacteria	Pseudomonadota	Pseudomonadati
Pontibacillus salicampi	B	7	7	1	20	Moderate	s	p	Lee et al 2015	2015	https://lpsn.dsmz.de/species/pontibacillus-salicampi	Pontibacillus	Bacillaceae	Caryophanales	Bacilli	Bacillota	Bacillati
Salininema proteolyticum	B	7	7	3	15	No Class	s	p	Nikou et al 2015	2015	https://lpsn.dsmz.de/species/salininema-proteolyticum	Salininema	Glycomycetaceae	Glycomycetales	Actinomycetes	Actinomycetota	Bacillati
Sediminispirochaeta sinaica	B	7	7	2	12	No Class	s	p	Dubinina et al 2015	2015	https://lpsn.dsmz.de/species/sediminispirochaeta-sinaica	Sediminispirochaeta	Spirochaetaceae	Spirochaetales	Spirochaetia	Spirochaetota	Pseudomonadati
Aquisalimonas lutea	B	7.5	7.5	5	20	Moderate	Salts	p	Infante-Domínguez et al 2015	2015	https://lpsn.dsmz.de/species/aquisalimonas-lutea	Aquisalimonas	Ectothiorhodospiraceae	Chromatiales	Gammaproteobacteria	Pseudomonadota	Pseudomonadati
Idiomarina aquatica	B	7.5	7.5	3	15	Moderate	s	p	León et al 2015	2015	https://lpsn.dsmz.de/species/idiomarina-aquatica	Idiomarina	Idiomarinaceae	Alteromonadales	Gammaproteobacteria	Pseudomonadota	Pseudomonadati
Aureibacillus halotolerans	B	4	8	0	15	Tolerant	s	p	Liu et al 2015	2015	https://lpsn.dsmz.de/species/aureibacillus-halotolerans	Aureibacillus	Bacillaceae	Caryophanales	Bacilli	Bacillota	Bacillati
Halobacillus andaensis	B	8	8	3	15	Moderate	s	p	Wang et al 2015	2015	https://lpsn.dsmz.de/species/halobacillus-andaensis	Halobacillus	Bacillaceae	Caryophanales	Bacilli	Bacillota	Bacillati
Longimonas halophila	B	6	8	4	25	No Class	s	p	Xia et al 2015	2015	https://lpsn.dsmz.de/species/longimonas-halophila	Longimonas	Salisaetaceae	Rhodothermales	Rhodothermia	Rhodothermota	Pseudomonadati
Marinobacter halophilus	B	4	8	0	20	No Class	s	p	Xhong et al 2015	2015	https://lpsn.dsmz.de/species/marinobacter-halophilus	Marinobacter	Alteromonadaceae	Alteromonadales	Gammaproteobacteria	Pseudomonadota	Pseudomonadati
Fodinicurvata halophila	B	10	10	5	20	Moderate	s	p	Infante-Domínguez et al 2015	2015	https://lpsn.dsmz.de/species/fodinicurvata-halophila	Fodinicurvata	Rhodovibrionaceae	Rhodospirillales	Alphaproteobacteria	Pseudomonadota	Pseudomonadati
Halobacillus sediminis	B	10	10	1	20	Moderate	s	p	Kim et al 2015	2015	https://lpsn.dsmz.de/species/halobacillus-sediminis	Halobacillus	Bacillaceae	Caryophanales	Bacilli	Bacillota	Bacillati
Melghiribacillus thermohalophilus	B	7	10	0.5	17	Moderate	s	p	Addou et al 2015	2015	https://lpsn.dsmz.de/species/melghiribacillus-thermohalophilus	Melghiribacillus	Bacillaceae	Caryophanales	Bacilli	Bacillota	Bacillati
Nesterenkonia populi	B	5	10	3	15	Moderate	s	p	Liu et al 2015	2015	https://lpsn.dsmz.de/species/nesterenkonia-populi	Nesterenkonia	Micrococcaceae	Micrococcales	Actinomycetes	Actinomycetota	Bacillati
Spiribacter curvatus	B	10	10	5	20	Moderate	s	p	León et al 2015	2015	https://lpsn.dsmz.de/species/spiribacter-curvatus	Spiribacter	Ectothiorhodospiraceae	Chromatiales	Gammaproteobacteria	Pseudomonadota	Pseudomonadati
Tamilnaduibacter salinus	B	8	10	1	20	Tolerant	s	p	Verma et al 2015	2015	https://lpsn.dsmz.de/species/tamilnaduibacter-salinus	Tamilnaduibacter	Alteromonadaceae	Alteromonadales	Gammaproteobacteria	Pseudomonadota	Pseudomonadati
Halomonas salicampi	B	14	14	0	23	Tolerant	s	p	Lee et al 2015	2015	https://lpsn.dsmz.de/species/halomonas-salicampi	Halomonas	Halomonadaceae	Oceanospirillales	Gammaproteobacteria	Pseudomonadota	Pseudomonadati
Prauserella isguenensis	B	7	15	5	25	No Class	s	p	Saker et al 2015	2015	https://lpsn.dsmz.de/species/prauserella-isguenensis	Prauserella	Pseudonocardiaceae	Pseudonocardiales	Actinomycetes	Actinomycetota	Bacillati
Salinicoccus sediminis	B	15	15	0	25	Tolerant	s	p	Kumar et al 2015	2015	https://lpsn.dsmz.de/species/salinicoccus-sediminis	Salinicoccus	Staphylococcaceae	Caryophanales	Bacilli	Bacillota	Bacillati
Sporohalobacter salinus	B	20	20	5	30	No Class	s	p	Abdallah et al 2015	2015	https://lpsn.dsmz.de/species/sporohalobacter-salinus	Sporohalobacter	Halobacteroidaceae	Halanaerobiales	Clostridia	Bacillota	Bacillati
Crassaminicella profunda	B	30	30	5	60	Slight	s	g	Lakhal et al 2015	2015	https://lpsn.dsmz.de/species/crassaminicella-profunda	Crassaminicella	Clostridiaceae	Eubacteriales	Clostridia	Bacillota	Bacillati
Phytoactinopolyspora endophytica	B			0	9	Tolerant	s	p	Li et al 2015	2015	https://lpsn.dsmz.de/species/phytoactinopolyspora-endophytica	Phytoactinopolyspora	Jiangellaceae	Jiangellales	Actinomycetes	Actinomycetota	Bacillati
Terasakiispira papahanaumokuakeensis	B			2	15	No Class	s	p	Zepeda et al 2015	2015	https://lpsn.dsmz.de/species/terasakiispira-papahanaumokuakeensis	Terasakiispira	Halomonadaceae	Oceanospirillales	Gammaproteobacteria	Pseudomonadota	Pseudomonadati
Vibrio renipiscarius	B			2	6	Slight	s	p	Tarazona et al 2015	2015	https://lpsn.dsmz.de/species/vibrio-renipiscarius	Vibrio	Vibrionaceae	Vibrionales	Gammaproteobacteria	Pseudomonadota	Pseudomonadati
Methanocalculus alkaliphilus	A	0.6	0.6	0.2	1.5	Tolerant	Na+	m	Sorokin et al 2015	2015	https://lpsn.dsmz.de/species/methanocalculus-alkaliphilus	Methanocalculus	Methanocalculaceae	Methanomicrobiales	Methanomicrobia	Methanobacteriota	Methanobacteriati
Methanosalsum natronophilum	A	1.5	1.5	0.5	3.5	Tolerant	Na+	m	Sorokin et al 2015	2015	https://lpsn.dsmz.de/species/methanosalsum-natronophilum	Methanosalsum	Methanosarcinaceae	Methanosarcinales	Methanosarcinia	Methanobacteriota	Methanobacteriati
Haloarchaeobius salinus	A	2	2	1.4	4.8	No Class	s	m	Yuan et al 2015	2015	https://lpsn.dsmz.de/species/haloarchaeobius-salinus	Haloarchaeobius	Halobacteriaceae	Halobacteriales	Halobacteria	Methanobacteriota	Methanobacteriati
Halorussus amylolyticus	A	2	2	1.4	4.8	No Class	s	m	Yuan et al 2015	2015	https://lpsn.dsmz.de/species/halorussus-amylolyticus	Halorussus	Halobacteriaceae	Halobacteriales	Halobacteria	Methanobacteriota	Methanobacteriati
Haloarcula salina	A	2.1	2.1	0.9	4.8	No Class	s	m	Zhang and Cui 2015	2015	https://lpsn.dsmz.de/species/haloarcula-salina	Haloarcula	Haloarculaceae	Halobacteriales	Halobacteria	Methanobacteriota	Methanobacteriati
Natribaculum breve	A	2.6	2.6	0.9	5.1	Extreme	s	m	Liu et al 2015	2015	https://lpsn.dsmz.de/species/natribaculum-breve	Natribaculum	Halobacteriaceae	Halobacteriales	Halobacteria	Methanobacteriota	Methanobacteriati
Halorubrum gandharaense	A	3.2	3.4	3	5.2	No Class	s	m	Kondo et al 2015	2015	https://lpsn.dsmz.de/species/halorubrum-gandharaense	Halorubrum	Haloferacaceae	Halobacteriales	Halobacteria	Methanobacteriota	Methanobacteriati
Halorubrum yunnanense	A	3.4	3.4	1.7	5.1	No Class	s	m	Chen et al 2015	2015	https://lpsn.dsmz.de/species/halorubrum-yunnanense	Halorubrum	Haloferacaceae	Halobacteriales	Halobacteria	Methanobacteriota	Methanobacteriati
Halovivax cerinus	A	3.4	3.4	2.5	5.1	Extreme	s	m	Amoozegar et al 2015	2015	https://lpsn.dsmz.de/species/halovivax-cerinus	Halovivax	Natrialbaceae	Halobacteriales	Halobacteria	Methanobacteriota	Methanobacteriati
Natribaculum longum	A	3.4	3.4	0.9	5.1	Extreme	s	m	Liu et al 2015	2015	https://lpsn.dsmz.de/species/natribaculum-longum	Natribaculum	Halobacteriaceae	Halobacteriales	Halobacteria	Methanobacteriota	Methanobacteriati
Natribaculum luteum	A	4	4	2.5	5	Extreme	s	m	Mehrshad et al 2015	2015	https://lpsn.dsmz.de/species/natribaculum-luteum	Natribaculum	Halobacteriaceae	Halobacteriales	Halobacteria	Methanobacteriota	Methanobacteriati
Halocalculus aciditolerans	A	15	18	12	30	Extreme	s	p	Minegishi et al 2015	2015	https://lpsn.dsmz.de/species/halocalculus-aciditolerans	Halocalculus	Halobacteriaceae	Halobacteriales	Halobacteria	Methanobacteriota	Methanobacteriati
Halorubrum persicum	A	20	20	15	30	Extreme	s	p	Corral et al 2015	2015	https://lpsn.dsmz.de/species/halorubrum-persicum	Halorubrum	Haloferacaceae	Halobacteriales	Halobacteria	Methanobacteriota	Methanobacteriati
Halarchaeum grantii	A	24	24	15	27	No Class	s	p	Shimane et al 2015	2015	https://lpsn.dsmz.de/species/halarchaeum-grantii	Halarchaeum	Halobacteriaceae	Halobacteriales	Halobacteria	Methanobacteriota	Methanobacteriati
Halolamina sediminis	A	20	25	15	30	Extreme	s	p	Koh et al 2015	2015	https://lpsn.dsmz.de/species/halolamina-sediminis	Halolamina	Haloferacaceae	Halobacteriales	Halobacteria	Methanobacteriota	Methanobacteriati
Halostagnicola bangensis	A	25	25	20	30	Extreme	s	p	Corral et al 2015	2015	https://lpsn.dsmz.de/species/halostagnicola-bangensis	Halostagnicola	Natrialbaceae	Halobacteriales	Halobacteria	Methanobacteriota	Methanobacteriati
Halovenus salina	A	25	25	15	30	Extreme	s	p	Infante-Domínguez et al 2015	2015	https://lpsn.dsmz.de/species/halovenus-salina	Halovenus	Halobacteriaceae	Halobacteriales	Halobacteria	Methanobacteriota	Methanobacteriati
Halococcus agarilyticus	A	27	27	24	30	Extreme	s	p	Minegishi et al 2015	2015	https://lpsn.dsmz.de/species/halococcus-agarilyticus	Halococcus	Halococcaceae	Halobacteriales	Halobacteria	Methanobacteriota	Methanobacteriati
Alkalispirochaeta cellulosivorans	B	1	1	0	10	Tolerant	s	p	Sravanthi et al 2016	2016	https://lpsn.dsmz.de/species/alkalispirochaeta-cellulosivorans	Alkalispirochaeta	Spirochaetaceae	Spirochaetales	Spirochaetia	Spirochaetota	Pseudomonadati
Spiribacter roseus	B	0.8	1	0.8	2.2	Moderate	s	m	León et al 2016	2016	https://lpsn.dsmz.de/species/spiribacter-roseus	Spiribacter	Ectothiorhodospiraceae	Chromatiales	Gammaproteobacteria	Pseudomonadota	Pseudomonadati
Thermanaeromonas burensis	B	1	1	0	20	Tolerant	s	g	Gam et al 2016	2016	https://lpsn.dsmz.de/species/thermanaeromonas-burensis	Thermanaeromonas	Moorellaceae	Moorellales	Clostridia	Bacillota	Bacillati
Marinobacter aromaticivorans	B	0.5	1.5	0.5	10	Tolerant	s	p	Cui et al 2016	2016	https://lpsn.dsmz.de/species/marinobacter-aromaticivorans	Marinobacter	Alteromonadaceae	Alteromonadales	Gammaproteobacteria	Pseudomonadota	Pseudomonadati
Bacillus ectoiniformans	B	2	2	0	10	Tolerant	s	p	Zhu et al 2016	2016	https://lpsn.dsmz.de/species/bacillus-ectoiniformans	Bacillus	Bacillaceae	Caryophanales	Bacilli	Bacillota	Bacillati
Marimicrobium arenosum	B	2	2	0	3	Moderate	s	p	Konkit et al 2016	2016	https://lpsn.dsmz.de/species/marimicrobium-arenosum	Marimicrobium	Halieaceae	Cellvibrionales	Gammaproteobacteria	Pseudomonadota	Pseudomonadati
Mongoliibacter ruber	B	0.5	2	0	6	No Class	s	p	Wang et al 2016	2016	https://lpsn.dsmz.de/species/mongoliibacter-ruber	Mongoliibacter	Cyclobacteriaceae	Cytophagales	Cytophagia	Bacteroidota	Pseudomonadati
Nesterenkonia aurantiaca	B	2	2	0.003	20	No Class	s	p	Finore et al 2016	2016	https://lpsn.dsmz.de/species/nesterenkonia-aurantiaca	Nesterenkonia	Micrococcaceae	Micrococcales	Actinomycetes	Actinomycetota	Bacillati
Streptomyces daqingensis	B	2	2	0	11	Moderate	s	p	Pan et al 2016	2016	https://lpsn.dsmz.de/species/streptomyces-daqingensis	Streptomyces	Streptomycetaceae	Kitasatosporales	Actinomycetes	Actinomycetota	Bacillati
Thalassobius litorarius	B	2	2	1	5	Slight	s	p	Park et al 2016	2016	https://lpsn.dsmz.de/species/thalassobius-litorarius	Thalassobius	Roseobacteraceae	Rhodobacterales	Alphaproteobacteria	Pseudomonadota	Pseudomonadati
Aliidiomarina iranensis	B	3	3	1	15	Slight	s	p	Amoozegar et al 2016	2016	https://lpsn.dsmz.de/species/aliidiomarina-iranensis	Aliidiomarina	Idiomarinaceae	Alteromonadales	Gammaproteobacteria	Pseudomonadota	Pseudomonadati
Glycomyces lacisalsi	B	1	3	0	9	Tolerant	s	p	Guan et al 2016	2016	https://lpsn.dsmz.de/species/glycomyces-lacisalsi	Glycomyces	Glycomycetaceae	Glycomycetales	Actinomycetes	Actinomycetota	Bacillati
Hoyosella rhizosphaerae	B	0	3	0	8	Tolerant	s	p	Li et al 2016	2016	https://lpsn.dsmz.de/species/hoyosella-rhizosphaerae	Hoyosella	Nocardiaceae	Mycobacteriales	Actinomycetes	Actinomycetota	Bacillati
Iodidimonas muriae	B	3	3	0.5	9	Moderate	s	p	Iino et al 2016	2016	https://lpsn.dsmz.de/species/iodidimonas-muriae	Iodidimonas	Iodidimonadaceae	Iodidimonadales	Alphaproteobacteria	Pseudomonadota	Pseudomonadati
Kordiimonas lipolytica	B	1	3	0.5	10	Slight	s	p	Wu et al 2016	2016	https://lpsn.dsmz.de/species/kordiimonas-lipolytica	Kordiimonas	Temperatibacteraceae	Kordiimonadales	Alphaproteobacteria	Pseudomonadota	Pseudomonadati
Polygonibacillus indicireducens	B	3	3	0	10	No Class	s	p	Hirota et al 2016	2016	https://lpsn.dsmz.de/species/polygonibacillus-indicireducens	Polygonibacillus	Bacillaceae	Caryophanales	Bacilli	Bacillota	Bacillati
Pontibacillus salipaludis	B	2	3	1	19	Slight	s	p	Sultanpuram et al 2016	2016	https://lpsn.dsmz.de/species/pontibacillus-salipaludis	Pontibacillus	Bacillaceae	Caryophanales	Bacilli	Bacillota	Bacillati
Psychroflexus salis	B	3	3	0.5	14	Moderate	s	p	Zhong et al 2016	2016	https://lpsn.dsmz.de/species/psychroflexus-salis	Psychroflexus	Flavobacteriaceae	Flavobacteriales	Flavobacteriia	Bacteroidota	Pseudomonadati
Spongiibacter taiwanensis	B	1	3	0.5	10	No Class	s	p	Jean et al 2016	2016	https://lpsn.dsmz.de/species/spongiibacter-taiwanensis	Spongiibacter	Spongiibacteraceae	Cellvibrionales	Gammaproteobacteria	Pseudomonadota	Pseudomonadati
Ornithinicoccus halotolerans	B	2	4	0	14	Tolerant	s	p	Zhang et al 2016	2016	https://lpsn.dsmz.de/species/ornithinicoccus-halotolerans	Ornithinicoccus	Intrasporangiaceae	Micrococcales	Actinomycetes	Actinomycetota	Bacillati
Rhodovulum aestuarii	B	2	4	0	8	Moderate	s	p	Divyasree et al 2016	2016	https://lpsn.dsmz.de/species/rhodovulum-aestuarii	Rhodovulum	Roseobacteraceae	Rhodobacterales	Alphaproteobacteria	Pseudomonadota	Pseudomonadati
Tagaea marina	B	2	4	1	10	No Class	s	p	Jean et al 2016	2016	https://lpsn.dsmz.de/species/tagaea-marina	Tagaea	Rhodospirillaceae	Rhodospirillales	Alphaproteobacteria	Pseudomonadota	Pseudomonadati
Alteribacillus alkaliphilus	B	3	5	0.5	24	Moderate	s	p	Begum et al 2016	2016	https://lpsn.dsmz.de/species/alteribacillus-alkaliphilus	Alteribacillus	Bacillaceae	Caryophanales	Bacilli	Bacillota	Bacillati
Egicoccus halophilus	B	3	5	0	9	Moderate	s	p	Zhang et al 2016	2016	https://lpsn.dsmz.de/species/egicoccus-halophilus	Egicoccus	Egicoccaceae	Egicoccales	Nitriliruptoria	Actinomycetota	Bacillati
Fictibacillus halophilus	B	5	5	0	12	Moderate	s	p	Sharma et al 2016	2016	https://lpsn.dsmz.de/species/fictibacillus-halophilus	Fictibacillus	Bacillaceae	Caryophanales	Bacilli	Bacillota	Bacillati
Maribacter lutimaris	B	2	5	1	7	Moderate	s	p	Kim et al 2016	2016	https://lpsn.dsmz.de/species/maribacter-lutimaris	Maribacter	Flavobacteriaceae	Flavobacteriales	Flavobacteriia	Bacteroidota	Pseudomonadati
Marinirhabdus gelatinilytica	B	2	5	0.5	7.5	Slight	s	p	Wu et al 2016	2016	https://lpsn.dsmz.de/species/marinirhabdus-gelatinilytica	Marinirhabdus	Flavobacteriaceae	Flavobacteriales	Flavobacteriia	Bacteroidota	Pseudomonadati
Oceanobacillus longus	B	5	5	1	20	Moderate	s	p	Amoozegar et al 2016	2016	https://lpsn.dsmz.de/species/oceanobacillus-longus	Oceanobacillus	Bacillaceae	Caryophanales	Bacilli	Bacillota	Bacillati
Phytoactinopolyspora alkaliphila	B	3	5	0	13	Tolerant	s	p	Zhang et al 2016	2016	https://lpsn.dsmz.de/species/phytoactinopolyspora-alkaliphila	Phytoactinopolyspora	Jiangellaceae	Jiangellales	Actinomycetes	Actinomycetota	Bacillati
Roseibium salinum	B	4	5	1	11	No Class	s	p	Camacho et al 2016	2016	https://lpsn.dsmz.de/species/roseibium-salinum	Roseibium	Stappiaceae	Hyphomicrobiales	Alphaproteobacteria	Pseudomonadota	Pseudomonadati
Salilacibacter albus	B	3	5	0	8	No Class	s	p	Li et al 2016	2016	https://lpsn.dsmz.de/species/salilacibacter-albus	Salilacibacter	Glycomycetaceae	Glycomycetales	Actinomycetes	Actinomycetota	Bacillati
Larsenimonas suaedae	B	5	6	0.6	20	Moderate	s	p	Xia et al 2016	2016	https://lpsn.dsmz.de/species/larsenimonas-suaedae	Larsenimonas	Halomonadaceae	Oceanospirillales	Gammaproteobacteria	Pseudomonadota	Pseudomonadati
Alkalicoccus urumqiensis	B	6.3	6.3	1.3	25.3	Moderate	s	p	Zhang et al 2016	2016	https://lpsn.dsmz.de/species/alkalicoccus-urumqiensis	Alkalicoccus	Bacillaceae	Caryophanales	Bacilli	Bacillota	Bacillati
Bacterioplanoides pacificum	B	7	7	0	11	Tolerant	s	p	Wang et al 2016	2016	https://lpsn.dsmz.de/species/bacterioplanoides-pacificum	Bacterioplanoides	Oceanospirillaceae	Oceanospirillales	Gammaproteobacteria	Pseudomonadota	Pseudomonadati
Lipingzhangella halophila	B	5	7	4	18	No Class	s	p	Zhang et al 2016	2016	https://lpsn.dsmz.de/species/lipingzhangella-halophila	Lipingzhangella	Nocardiopsidaceae	Streptosporangiales	Actinomycetes	Actinomycetota	Bacillati
Halomonas lutescens	B	7.5	7.5	0	20	Moderate	s	p	Wang et al 2016	2016	https://lpsn.dsmz.de/species/halomonas-lutescens	Halomonas	Halomonadaceae	Oceanospirillales	Gammaproteobacteria	Pseudomonadota	Pseudomonadati
Oceanobacillus halophilus	B	7.5	7.5	3	15	Moderate	s	p	Amoozegar et al 2016	2016	https://lpsn.dsmz.de/species/oceanobacillus-halophilus	Oceanobacillus	Bacillaceae	Caryophanales	Bacilli	Bacillota	Bacillati
Lentibacillus populi	B	7	8	0	15	Moderate	s	p	Sun et al 2016	2016	https://lpsn.dsmz.de/species/lentibacillus-populi	Lentibacillus	Bacillaceae	Caryophanales	Bacilli	Bacillota	Bacillati
Salinicoccus amylolyticus	B	8	8	0	25	Moderate	s	p	Srinivas et al 2016	2016	https://lpsn.dsmz.de/species/salinicoccus-amylolyticus	Salinicoccus	Staphylococcaceae	Caryophanales	Bacilli	Bacillota	Bacillati
Halomonas urumqiensis	B	8.3	8.3	1.3	25.3	Moderate	s	p	Zhang et al 2016	2016	https://lpsn.dsmz.de/species/halomonas-urumqiensis	Halomonas	Halomonadaceae	Oceanospirillales	Gammaproteobacteria	Pseudomonadota	Pseudomonadati
Fodinibius halophilus	B	6	10	2	18	Moderate	s	p	Xia et al 2016	2016	https://lpsn.dsmz.de/species/fodinibius-halophilus	Fodinibius	Balneolaceae	Balneolales	Balneolia	Balneolota	Pseudomonadati
Halomonas garicola	B	10	10	3	22.5	Moderate	Marine Salts	p	Jung et al 2016	2016	https://lpsn.dsmz.de/species/halomonas-garicola	Halomonas	Halomonadaceae	Oceanospirillales	Gammaproteobacteria	Pseudomonadota	Pseudomonadati
Halomonas sediminicola	B	10	10	1	20	Moderate	s	p	Lee et al 2016	2016	https://lpsn.dsmz.de/species/halomonas-sediminicola	Halomonas	Halomonadaceae	Oceanospirillales	Gammaproteobacteria	Pseudomonadota	Pseudomonadati
Paludifilum halophilum	B	10	10	5	20	No Class	s	p	Frikha-Dammak et al 2016	2016	https://lpsn.dsmz.de/species/paludifilum-halophilum	Paludifilum	Thermoactinomycetaceae	Caryophanales	Bacilli	Bacillota	Bacillati
Streptomyces chitinivorans	B	0	10	0	18	Tolerant	s	p	Ray et al 2016	2016	https://lpsn.dsmz.de/species/streptomyces-chitinivorans	Streptomyces	Streptomycetaceae	Kitasatosporales	Actinomycetes	Actinomycetota	Bacillati
Egibacter rhizosphaerae	B	10	12	8	25	No Class	s	p	Zhang et al 2016	2016	https://lpsn.dsmz.de/species/egibacter-rhizosphaerae	Egibacter	Egibacteraceae	Egibacterales	Nitriliruptoria	Actinomycetota	Bacillati
Longibacter salinarum	B	8	12	2	20	No Class	s	p	Xia et al 2016	2016	https://lpsn.dsmz.de/species/longibacter-salinarum	Longibacter	Salisaetaceae	Rhodothermales	Rhodothermia	Rhodothermota	Pseudomonadati
Actinopolyspora salinaria	B	10	20	10	25	No Class	s	p	Duangmal et al 2016	2016	https://lpsn.dsmz.de/species/actinopolyspora-salinaria	Actinopolyspora	Pseudonocardiaceae	Pseudonocardiales	Actinomycetes	Actinomycetota	Bacillati
Marinomonas blandensis	B			2.5	7	Moderate	Marine Salts	p	Arahal et al 2016	2016	https://lpsn.dsmz.de/species/marinomonas-blandensis	Marinomonas	Oceanospirillaceae	Oceanospirillales	Gammaproteobacteria	Pseudomonadota	Pseudomonadati
Marinomonas spartinae	B			2	15	Slight	s	p	Lucena et al 2016	2016	https://lpsn.dsmz.de/species/marinomonas-spartinae	Marinomonas	Oceanospirillaceae	Oceanospirillales	Gammaproteobacteria	Pseudomonadota	Pseudomonadati
Microbulbifer rhizosphaerae	B			1	6	No Class	s	p	Camacho et al 2016	2016	https://lpsn.dsmz.de/species/microbulbifer-rhizosphaerae	Microbulbifer	Microbulbiferaceae	Cellvibrionales	Gammaproteobacteria	Pseudomonadota	Pseudomonadati
Halopiger thermotolerans	A	2.5	2.5	1.7	4.6	No Class	s	m	Minegishi et al 2016	2016	https://lpsn.dsmz.de/species/halopiger-thermotolerans	Halopiger	Natrialbaceae	Halobacteriales	Halobacteria	Methanobacteriota	Methanobacteriati
Haloarchaeobius baliensis	A	2.6	2.6	1.7	5.1	Extreme	s	m	Mori et al 2016	2016	https://lpsn.dsmz.de/species/haloarchaeobius-baliensis	Haloarchaeobius	Halobacteriaceae	Halobacteriales	Halobacteria	Methanobacteriota	Methanobacteriati
Halobium palmae	A	2.6	2.6	1.7	5.1	Extreme	s	m	Mori et al 2016	2016	https://lpsn.dsmz.de/species/halobium-palmae	Halobium	Haloferacaceae	Halobacteriales	Halobacteria	Methanobacteriota	Methanobacteriati
Haloparvum alkalitolerans	A	2.1	2.6	2.1	4.7	No Class	s	m	Kondo et al 2016	2016	https://lpsn.dsmz.de/species/haloparvum-alkalitolerans	Haloparvum	Haloferacaceae	Halobacteriales	Halobacteria	Methanobacteriota	Methanobacteriati
Salinigranum salinum	A	2.6	2.6	0.9	4.8	Extreme	s	m	Wang et al 2016	2016	https://lpsn.dsmz.de/species/salinigranum-salinum	Salinigranum	Haloferacaceae	Halobacteriales	Halobacteria	Methanobacteriota	Methanobacteriati
Haloparvum sedimenti	A	2.6	3.4	1.7	5.1	Extreme	s	m	Chen et al 2016	2016	https://lpsn.dsmz.de/species/haloparvum-sedimenti	Haloparvum	Haloferacaceae	Halobacteriales	Halobacteria	Methanobacteriota	Methanobacteriati
Halorubrum pallidum	A	3.4	3.4	2.6	5.1	Extreme	s	m	Chen et al 2016	2016	https://lpsn.dsmz.de/species/halorubrum-pallidum	Halorubrum	Haloferacaceae	Halobacteriales	Halobacteria	Methanobacteriota	Methanobacteriati
Halanaeroarchaeum sulfurireducens	A	4	4	3	5	Extreme	s	m	Sorokin et al 2016	2016	https://lpsn.dsmz.de/species/halanaeroarchaeum-sulfurireducens	Halanaeroarchaeum	Halobacteriaceae	Halobacteriales	Halobacteria	Methanobacteriota	Methanobacteriati
Halomicrobium urmianum	A	4	4	2.5	5	Extreme	s	m	Mehrshad et al 2016	2016	https://lpsn.dsmz.de/species/halomicrobium-urmianum	Halomicrobium	Haloarculaceae	Halobacteriales	Halobacteria	Methanobacteriota	Methanobacteriati
Halostella salina	A	20	20	15	30	Extreme	s	p	Song et al 2016	2016	https://lpsn.dsmz.de/species/halostella-salina	Halostella	Natronoarchaeaceae	Halobacteriales	Halobacteria	Methanobacteriota	Methanobacteriati
Halorubrum halodurans	A	25	25	20	30	Extreme	s	p	Corral et al. 2016	2016	https://lpsn.dsmz.de/species/halorubrum-halodurans	Halorubrum	Haloferacaceae	Halobacteriales	Halobacteria	Methanobacteriota	Methanobacteriati
Flavobacterium fluminis	B	0	0	0	3	Tolerant	s	p	Ahn et al 2017	2017	https://lpsn.dsmz.de/species/flavobacterium-fluminis	Flavobacterium	Flavobacteriaceae	Flavobacteriales	Flavobacteriia	Bacteroidota	Pseudomonadati
Mangrovibacter phragmitis	B	1	1	0	8	Slight	s	p	Behera et al 2017	2017	https://lpsn.dsmz.de/species/mangrovibacter-phragmitis	Mangrovibacter	Enterobacteriaceae	Enterobacterales	Gammaproteobacteria	Pseudomonadota	Pseudomonadati
Marinomonas algicida	B	1	1	1	12	Moderate	s	p	Kristyanto et al 2017	2017	https://lpsn.dsmz.de/species/marinomonas-algicida	Marinomonas	Oceanospirillaceae	Oceanospirillales	Gammaproteobacteria	Pseudomonadota	Pseudomonadati
Consotaella salsifontis	B	1.5	1.5	0	7	Slight	s	p	Díaz-Cárdenas et al 2017	2017	https://lpsn.dsmz.de/species/consotaella-salsifontis	Consotaella	Aurantimonadaceae	Hyphomicrobiales	Alphaproteobacteria	Pseudomonadota	Pseudomonadati
Ruegeria profundi	B	1	1.5	0.5	1.9	Moderate	s	m	Zhang et al 2017	2017	https://lpsn.dsmz.de/species/ruegeria-profundi	Ruegeria	Roseobacteraceae	Rhodobacterales	Alphaproteobacteria	Pseudomonadota	Pseudomonadati
Halomonas alkalicola	B	0	2	0	8	Moderate	s	p	Tang et al 2017	2017	https://lpsn.dsmz.de/species/halomonas-alkalicola	Halomonas	Halomonadaceae	Oceanospirillales	Gammaproteobacteria	Pseudomonadota	Pseudomonadati
Parahaliea aestuarii	B	2	2	0	8	Tolerant	s	p	Jung et al 2017	2017	https://lpsn.dsmz.de/species/parahaliea-aestuarii	Parahaliea	Halieaceae	Cellvibrionales	Gammaproteobacteria	Pseudomonadota	Pseudomonadati
Parasphingopyxis algicola	B	2	2	0	6	Slight	s	p	Jeong et al 2017	2017	https://lpsn.dsmz.de/species/parasphingopyxis-algicola	Parasphingopyxis	Sphingomonadaceae	Sphingomonadales	Alphaproteobacteria	Pseudomonadota	Pseudomonadati
Pontibacterium granulatum	B	2	2	1	6	Moderate	s	p	Hyeon et al 2017	2017	https://lpsn.dsmz.de/species/pontibacterium-granulatum	Pontibacterium	Oceanospirillaceae	Oceanospirillales	Gammaproteobacteria	Pseudomonadota	Pseudomonadati
Ruegeria marisrubri	B	1.5	2	0.5	2.6	Moderate	s	m	Zhang et al 2017	2017	https://lpsn.dsmz.de/species/ruegeria-marisrubri	Ruegeria	Roseobacteraceae	Rhodobacterales	Alphaproteobacteria	Pseudomonadota	Pseudomonadati
Soortia roseihalophila	B	2	2	1	3	Slight	s	p	Amoozegar et al 2017	2017	https://lpsn.dsmz.de/species/soortia-roseihalophila	Soortia	Soortiaceae	Balneolales	Balneolia	Balneolota	Pseudomonadati
Natronospira proteinivora	B	2	2.5	1	4.5	Tolerant	Na+	m	Sorokin et la 2017	2017	https://lpsn.dsmz.de/species/natronospira-proteinivora	Natronospira	Ectothiorhodospiraceae	Chromatiales	Gammaproteobacteria	Pseudomonadota	Pseudomonadati
Oleiagrimonas citrea	B	2.5	2.5	0	6	Slight	s	p	Yang et al 2017	2017	https://lpsn.dsmz.de/species/oleiagrimonas-citrea	Oleiagrimonas	Rhodanobacteraceae	Lysobacterales	Gammaproteobacteria	Pseudomonadota	Pseudomonadati
Arcobacter lekithochrous	B	3	3			No Class	Sea salts	p	Diéguez et al 2017	2017	https://lpsn.dsmz.de/species/arcobacter-lekithochrous	Arcobacter	Arcobacteraceae	Campylobacterales	Epsilonproteobacteria	Pseudomonadota	Pseudomonadati
Marinobacter halotolerans	B	3	3	0.5	20	Moderate	s	p	Kim et al 2017	2017	https://lpsn.dsmz.de/species/marinobacter-halotolerans	Marinobacter	Alteromonadaceae	Alteromonadales	Gammaproteobacteria	Pseudomonadota	Pseudomonadati
Marinobacter salexigens	B	3	3	0.5	15	Moderate	s	p	Han et al 2017	2017	https://lpsn.dsmz.de/species/marinobacter-salexigens	Marinobacter	Alteromonadaceae	Alteromonadales	Gammaproteobacteria	Pseudomonadota	Pseudomonadati
Microbulbifer aggregans	B	2	3	0.5	8	No Class	s	p	Moh et al 2017	2017	https://lpsn.dsmz.de/species/microbulbifer-aggregans	Microbulbifer	Microbulbiferaceae	Cellvibrionales	Gammaproteobacteria	Pseudomonadota	Pseudomonadati
Natronotalea proteinilytica	B	2.5	3	2	4.5	Extreme	Na+	m	Sorokin et al 2017	2017	https://lpsn.dsmz.de/species/natronotalea-proteinilytica	Natronotalea	Salisaetaceae	Rhodothermales	Rhodothermia	Rhodothermota	Pseudomonadati
Oceanispirochaeta sediminicola	B	2	3	1	7	Moderate	s	p	Subhash and Lee 2017	2017	https://lpsn.dsmz.de/species/oceanispirochaeta-sediminicola	Oceanispirochaeta	Spirochaetaceae	Spirochaetales	Spirochaetia	Spirochaetota	Pseudomonadati
Psychroflexus planctonicus	B	3	3	0.5	14	Moderate	s	p	Zhong et al 2017	2017	https://lpsn.dsmz.de/species/psychroflexus-planctonicus	Psychroflexus	Flavobacteriaceae	Flavobacteriales	Flavobacteriia	Bacteroidota	Pseudomonadati
Saccharopolyspora spongiae	B	3	3	0	7	Tolerant	s	p	Souza et al 2017	2017	https://lpsn.dsmz.de/species/saccharopolyspora-spongiae	Saccharopolyspora	Pseudonocardiaceae	Pseudonocardiales	Actinomycetes	Actinomycetota	Bacillati
Maribacter pelagius	B	2	4	2	6	Slight	s	p	Jin et al 2017	2017	https://lpsn.dsmz.de/species/maribacter-pelagius	Maribacter	Flavobacteriaceae	Flavobacteriales	Flavobacteriia	Bacteroidota	Pseudomonadati
Psychromarinibacter halotolerans	B	4	4	1	12	Tolerant	s	p	Qiao et al 2017	2017	https://lpsn.dsmz.de/species/psychromarinibacter-halotolerans	Psychromarinibacter	Roseobacteraceae	Rhodobacterales	Alphaproteobacteria	Pseudomonadota	Pseudomonadati
Aliidiomarina sedimenti	B	5	5	1	15	Moderate	s	p	Shahinpei et al 2017	2017	https://lpsn.dsmz.de/species/aliidiomarina-sedimenti	Aliidiomarina	Idiomarinaceae	Alteromonadales	Gammaproteobacteria	Pseudomonadota	Pseudomonadati
Marivibrio halodurans	B	5	5	2	15	Tolerant	s	p	Chen et al 2017	2017	https://lpsn.dsmz.de/species/marivibrio-halodurans	Marivibrio	Kiloniellaceae	Rhodospirillales	Alphaproteobacteria	Pseudomonadota	Pseudomonadati
Paraliobacillus sediminis	B	3	5	0	15	Slight	s	p	Cao et al 2017	2017	https://lpsn.dsmz.de/species/paraliobacillus-sediminis	Paraliobacillus	Bacillaceae	Caryophanales	Bacilli	Bacillota	Bacillati
Prauserella oleivorans	B	3	5	0	12.5	No Class	s	p	Dastgheib et al 2017	2017	https://lpsn.dsmz.de/species/prauserella-oleivorans	Prauserella	Pseudonocardiaceae	Pseudonocardiales	Actinomycetes	Actinomycetota	Bacillati
Salinicola tamaricis	B	5	5	0	25	Moderate	s	p	Zhao et al 2017	2017	https://lpsn.dsmz.de/species/salinicola-tamaricis	Salinicola	Halomonadaceae	Oceanospirillales	Gammaproteobacteria	Pseudomonadota	Pseudomonadati
Lentibacillus sediminis	B	6	6	1	20	Moderate	s	p	Guo et al 2017	2017	https://lpsn.dsmz.de/species/lentibacillus-sediminis	Lentibacillus	Bacillaceae	Caryophanales	Bacilli	Bacillota	Bacillati
Marinobacter salinus	B	3	6	0.5	15	Moderate	s	p	Rani et al. 2017	2017	https://lpsn.dsmz.de/species/marinobacter-salinus	Marinobacter	Alteromonadaceae	Alteromonadales	Gammaproteobacteria	Pseudomonadota	Pseudomonadati
Salibacter halophilus	B	6	6	2	18	No Class	s	p	Lu et al 2017	2017	https://lpsn.dsmz.de/species/salibacter-halophilus	Salibacter	Cryomorphaceae	Flavobacteriales	Flavobacteriia	Bacteroidota	Pseudomonadati
Halalkalibacter kiskunsagensis	B	5	7	5	10	Moderate	s	p	Borsodi et al. 2017	2017	https://lpsn.dsmz.de/species/halalkalibacter-kiskunsagensis	Halalkalibacter	Bacillaceae	Caryophanales	Bacilli	Bacillota	Bacillati
Nesterenkonia pannonica	B	5	7	0	15	Moderate	s	p	Borsodi et al 2017	2017	https://lpsn.dsmz.de/species/nesterenkonia-pannonica	Nesterenkonia	Micrococcaceae	Micrococcales	Actinomycetes	Actinomycetota	Bacillati
Nitrincola alkalilacustris	B	0	7	0	10	Tolerant	s	p	Borsodi et al 2017	2017	https://lpsn.dsmz.de/species/nitrincola-alkalilacustris	Nitrincola	Oceanospirillaceae	Oceanospirillales	Gammaproteobacteria	Pseudomonadota	Pseudomonadati
Nitrincola schmidtii	B	0	7	0	10	Tolerant	s	p	Borsodi et al 2017	2017	https://lpsn.dsmz.de/species/nitrincola-schmidtii	Nitrincola	Oceanospirillaceae	Oceanospirillales	Gammaproteobacteria	Pseudomonadota	Pseudomonadati
Paralkalibacillus indicireducens	B	7	7	0	10	No Class	s	p	Hirota et al 2017	2017	https://lpsn.dsmz.de/species/paralkalibacillus-indicireducens	Paralkalibacillus	Bacillaceae	Caryophanales	Bacilli	Bacillota	Bacillati
Rhodosalinus sediminis	B	7	7	3	20	Moderate	s	p	Guo et al 2017	2017	https://lpsn.dsmz.de/species/rhodosalinus-sediminis	Rhodosalinus	Roseobacteraceae	Rhodobacterales	Alphaproteobacteria	Pseudomonadota	Pseudomonadati
Croceibacterium salegens	B	3	8	2	10	Slight	s	p	Liang et al 2017	2017	https://lpsn.dsmz.de/species/croceibacterium-salegens	Croceibacterium	Erythrobacteraceae	Sphingomonadales	Alphaproteobacteria	Pseudomonadota	Pseudomonadati
Gracilimonas halophila	B	6	8	2	16	Moderate	s	p	Lu et al 2017	2017	https://lpsn.dsmz.de/species/gracilimonas-halophila	Gracilimonas	Balneolaceae	Balneolales	Balneolia	Balneolota	Pseudomonadati
Oceaniglobus indicus	B	7	8	0.5	10	Tolerant	s	p	Li et al 2017	2017	https://lpsn.dsmz.de/species/oceaniglobus-indicus	Oceaniglobus	Roseobacteraceae	Rhodobacterales	Alphaproteobacteria	Pseudomonadota	Pseudomonadati
Salirhabdus salicampi	B	8	8	0	16	Tolerant	s	p	Lee and Whang 2017	2017	https://lpsn.dsmz.de/species/salirhabdus-salicampi	Salirhabdus	Bacillaceae	Caryophanales	Bacilli	Bacillota	Bacillati
Fodinibius salicampi	B	10	10	3	25	Moderate	s	p	Cho et al 2017	2017	https://lpsn.dsmz.de/species/fodinibius-salicampi	Fodinibius	Balneolaceae	Balneolales	Balneolia	Balneolota	Pseudomonadati
Halofilum ochraceum	B	8	10	2	20	No Class	s	p	Xia et al 2017	2017	https://lpsn.dsmz.de/species/halofilum-ochraceum	Halofilum	Ectothiorhodospiraceae	Chromatiales	Gammaproteobacteria	Pseudomonadota	Pseudomonadati
Halomonas aestuarii	B	3	10	1	20	Moderate	s	p	Koh et al 2017	2017	https://lpsn.dsmz.de/species/halomonas-aestuarii	Halomonas	Halomonadaceae	Oceanospirillales	Gammaproteobacteria	Pseudomonadota	Pseudomonadati
Marinobacter aquaticus	B	10	10	5	25	Moderate	s	p	León et al 2017	2017	https://lpsn.dsmz.de/species/marinobacter-aquaticus	Marinobacter	Alteromonadaceae	Alteromonadales	Gammaproteobacteria	Pseudomonadota	Pseudomonadati
Rhodohalobacter halophilus	B	8	10	2	16	Moderate	s	p	Xia et al 2017	2017	https://lpsn.dsmz.de/species/rhodohalobacter-halophilus	Rhodohalobacter	Balneolaceae	Balneolales	Balneolia	Balneolota	Pseudomonadati
Pseudoponticoccus marisrubri	B	9	12	3	18	Moderate	s	p	Zhang et al 2017	2017	https://lpsn.dsmz.de/species/pseudoponticoccus-marisrubri	Pseudoponticoccus	Roseobacteraceae	Rhodobacterales	Alphaproteobacteria	Pseudomonadota	Pseudomonadati
Saccharopolyspora aidingensis	B	12	12	8	18	No Class	s	p	Xia et al 2017	2017	https://lpsn.dsmz.de/species/saccharopolyspora-aidingensis	Saccharopolyspora	Pseudonocardiaceae	Pseudonocardiales	Actinomycetes	Actinomycetota	Bacillati
Salinifilum aidingense	B	12	12	8	18	No Class	s	p	Nikou et al 2017	2017	https://lpsn.dsmz.de/species/salinifilum-aidingense	Salinifilum	Pseudonocardiaceae	Pseudonocardiales	Actinomycetes	Actinomycetota	Bacillati
Alkalicoccus halolimnae	B	8.3	12.3	4.3	24.3	Moderate	s	p	Zhao et al 2017	2017	https://lpsn.dsmz.de/species/alkalicoccus-halolimnae	Alkalicoccus	Bacillaceae	Caryophanales	Bacilli	Bacillota	Bacillati
Kushneria konosiri	B	11	19	0	26	No Class	s	p	Yun et al 2017	2017	https://lpsn.dsmz.de/species/kushneria-konosiri	Kushneria	Halomonadaceae	Oceanospirillales	Gammaproteobacteria	Pseudomonadota	Pseudomonadati
Haloactinomyces albus	B	20	20	10	35	Extreme	s	p	Lai et al 2017	2017	https://lpsn.dsmz.de/species/haloactinomyces-albus	Haloactinomyces	Pseudonocardiaceae	Pseudonocardiales	Actinomycetes	Actinomycetota	Bacillati
Salinifilum proteinilyticum	B	15	20	12	25	Extreme	s	p	Nikou et al 2017	2017	https://lpsn.dsmz.de/species/salinifilum-proteinilyticum	Salinifilum	Pseudonocardiaceae	Pseudonocardiales	Actinomycetes	Actinomycetota	Bacillati
Sporosalibacterium tautonense	B	20	20	5	100	Moderate	s	g	Podosokorskaya et al 2017	2017	https://lpsn.dsmz.de/species/sporosalibacterium-tautonense	Sporosalibacterium	Clostridiaceae	Eubacteriales	Clostridia	Bacillota	Bacillati
Pseudodesulfovibrio senegalensis	B	30	30	5	65	Moderate	s	g	Thioye et al 2017	2017	https://lpsn.dsmz.de/species/pseudodesulfovibrio-senegalensis	Pseudodesulfovibrio	Desulfovibrionaceae	Desulfovibrionales	Deltaproteobacteria	Pseudomonadota	Pseudomonadati
Alkaliphilus namsaraevii	B	40	40	5	150	No Class	s	g	Zakharyuk et al 2017	2017	https://lpsn.dsmz.de/species/alkaliphilus-namsaraevii	Alkaliphilus	Clostridiaceae	Eubacteriales	Clostridia	Bacillota	Bacillati
Colwellia marinimaniae	B					No Class	s	p	Kusube et al 2017	2017	https://lpsn.dsmz.de/species/colwellia-marinimaniae	Colwellia	Colwelliaceae	Alteromonadales	Gammaproteobacteria	Pseudomonadota	Pseudomonadati
Haloplanus salinarum	A	3.1	3.1	2.5	4.5	Extreme	s	m	Hwang et al 2017	2017	https://lpsn.dsmz.de/species/haloplanus-salinarum	Haloplanus	Haloferacaceae	Halobacteriales	Halobacteria	Methanobacteriota	Methanobacteriati
Salinarchaeum chitinilyticum	A	2.6	3.1	1.5	5.1	No Class	s	m	Minegishi et al 2017	2017	https://lpsn.dsmz.de/species/salinarchaeum-chitinilyticum	Salinarchaeum	Natronoarchaeaceae	Halobacteriales	Halobacteria	Methanobacteriota	Methanobacteriati
Salinirussus salinus	A	3.4	3.4	2.6	4.8	No Class	s	m	Cui et al 2017	2017	https://lpsn.dsmz.de/species/salinirussus-salinus	Salinirussus	Haloarculaceae	Halobacteriales	Halobacteria	Methanobacteriota	Methanobacteriati
Natronoarchaeum persicum	A	3.5	3.5	2.5	4.5	No Class	s	m	Naghoni et al 2017	2017	https://lpsn.dsmz.de/species/natronoarchaeum-persicum	Natronoarchaeum	Natronoarchaeaceae	Halobacteriales	Halobacteria	Methanobacteriota	Methanobacteriati
Halobacterium litoreum	A	3.9	3.9	1.7	4.8	No Class	s	m	Lü et al 2017	2017	https://lpsn.dsmz.de/species/halobacterium-litoreum	Halobacterium	Halobacteriaceae	Halobacteriales	Halobacteria	Methanobacteriota	Methanobacteriati
Natrinema soli	A	4	4	3	4.5	Extreme	s	m	Rasooli et al 2017	2017	https://lpsn.dsmz.de/species/natrinema-soli	Natrinema	Natrialbaceae	Halobacteriales	Halobacteria	Methanobacteriota	Methanobacteriati
Haloprofundus marisrubri	A	3.5	4.3	1.2	5.8	Extreme	s	m	Zhang et al 2017	2017	https://lpsn.dsmz.de/species/haloprofundus-marisrubri	Haloprofundus	Haloferacaceae	Halobacteriales	Halobacteria	Methanobacteriota	Methanobacteriati
Natrinema mahii	A	3.5	5	2	5.1	Extreme	s	m	Ding et al 2017	2017	https://lpsn.dsmz.de/species/natrinema-mahii	Natrinema	Natrialbaceae	Halobacteriales	Halobacteria	Methanobacteriota	Methanobacteriati
Halobaculum roseum	A	20	20	10	30	Extreme	s	p	Chen et al 2017	2017	https://lpsn.dsmz.de/species/halobaculum-roseum	Halobaculum	Haloferacaceae	Halobacteriales	Halobacteria	Methanobacteriota	Methanobacteriati
Halorubrum trueperi	A	20	20	15	30	Extreme	s	p	Chen et al 2017	2017	https://lpsn.dsmz.de/species/halorubrum-trueperi	Halorubrum	Haloferacaceae	Halobacteriales	Halobacteria	Methanobacteriota	Methanobacteriati
Saliphagus infecundisoli	A	20	20	5	35	Extreme	s	p	Yin et al 2017	2017	https://lpsn.dsmz.de/species/saliphagus-infecundisoli	Saliphagus	Natrialbaceae	Halobacteriales	Halobacteria	Methanobacteriota	Methanobacteriati
Thioclava sediminum	B	2	2	0	10	Tolerant	s	p	Chang et al 2018	2018	https://lpsn.dsmz.de/species/thioclava-sediminum	Thioclava	Paracoccaceae	Rhodobacterales	Alphaproteobacteria	Pseudomonadota	Pseudomonadati
Stakelama algicida	B	0	0	0	11	Tolerant	s	p	Kristyanto et al 2018	2018	https://lpsn.dsmz.de/species/stakelama-algicida	Stakelama	Sphingomonadaceae	Sphingomonadales	Alphaproteobacteria	Pseudomonadota	Pseudomonadati
Pelagibacterium montanilacus	B	0	1	0	8	Tolerant	s	p	Lu et al 2018	2018	https://lpsn.dsmz.de/species/pelagibacterium-montanilacus	Pelagibacterium	Devosiaceae	Hyphomicrobiales	Alphaproteobacteria	Pseudomonadota	Pseudomonadati
Roseovarius nitratireducens	B	1.5	1.5	0.5	18	Tolerant	s	p	Shen et al 2018	2018	https://lpsn.dsmz.de/species/roseovarius-nitratireducens	Roseovarius	Roseobacteraceae	Rhodobacterales	Alphaproteobacteria	Pseudomonadota	Pseudomonadati
Aestuariicoccus marinus	B	2	2	0.5	12	Tolerant	s	p	Feng et al 2018	2018	https://lpsn.dsmz.de/species/aestuariicoccus-marinus	Aestuariicoccus	Roseobacteraceae	Rhodobacterales	Alphaproteobacteria	Pseudomonadota	Pseudomonadati
Albirhodobacter confluentis	B	2	2	0	6	Moderate	s	p	Jung et al 2018	2018	https://lpsn.dsmz.de/species/albirhodobacter-confluentis	Albirhodobacter	Paracoccaceae	Rhodobacterales	Alphaproteobacteria	Pseudomonadota	Pseudomonadati
Evansella tamaricis	B	1	2	0	10	Slight	s	p	Zhang et al 2018	2018	https://lpsn.dsmz.de/species/evansella-tamaricis	Evansella	Bacillaceae	Caryophanales	Bacilli	Bacillota	Bacillati
Pelagivirga sediminicola	B	2	2	1	10	Slight	s	p	Ji et al 2018	2018	https://lpsn.dsmz.de/species/pelagivirga-sediminicola	Pelagivirga	Roseobacteraceae	Rhodobacterales	Alphaproteobacteria	Pseudomonadota	Pseudomonadati
Streptomyces durbertensis	B	2	2	0	10	Moderate	s	p	Yu et al 2018	2018	https://lpsn.dsmz.de/species/streptomyces-durbertensis	Streptomyces	Streptomycetaceae	Kitasatosporales	Actinomycetes	Actinomycetota	Bacillati
Kordiimonas pumila	B	2.5	2.5	1	4	Slight	s	p	Ju et al 2018	2018	https://lpsn.dsmz.de/species/kordiimonas-pumila	Kordiimonas	Temperatibacteraceae	Kordiimonadales	Alphaproteobacteria	Pseudomonadota	Pseudomonadati
Kushneria phyllosphaerae	B	2.5	2.5	0.5	25	Moderate	s	p	Navarro-Torre et al 2018	2018	https://lpsn.dsmz.de/species/kushneria-phyllosphaerae	Kushneria	Halomonadaceae	Oceanospirillales	Gammaproteobacteria	Pseudomonadota	Pseudomonadati
Ketobacter alkanivorans	B	3	3	1	7	No Class	s	p	Kim et al 2018	2018	https://lpsn.dsmz.de/species/ketobacter-alkanivorans	Ketobacter	Alcanivoracaceae	Oceanospirillales	Gammaproteobacteria	Pseudomonadota	Pseudomonadati
Longimonas haloalkaliphila	B	2.5	3	2	4.8	Extreme	Na+	m	Sorokin et al 2018	2018	https://lpsn.dsmz.de/species/longimonas-haloalkaliphila	Longimonas	Salisaetaceae	Rhodothermales	Rhodothermia	Rhodothermota	Pseudomonadati
Maribacter litoralis	B	0	3	0	9	Moderate	s	p	Lee et al 2018	2018	https://lpsn.dsmz.de/species/maribacter-litoralis	Maribacter	Flavobacteriaceae	Flavobacteriales	Flavobacteriia	Bacteroidota	Pseudomonadati
Maridesulfovibrio salinus	B	3	3	1	12	Slight	s	p	Gam et al 2018	2018	https://lpsn.dsmz.de/species/maridesulfovibrio-salinus	Maridesulfovibrio	Desulfovibrionaceae	Desulfovibrionales	Deltaproteobacteria	Pseudomonadota	Pseudomonadati
Marinobacter fuscus	B	3	3	0	12.5	No Class	s	p	Liu et al 2018	2018	https://lpsn.dsmz.de/species/marinobacter-fuscus	Marinobacter	Alteromonadaceae	Alteromonadales	Gammaproteobacteria	Pseudomonadota	Pseudomonadati
Planococcus halotolerans	B	3	3	0	15	Tolerant	s	p	Gan et al 2018	2018	https://lpsn.dsmz.de/species/planococcus-halotolerans	Planococcus	Caryophanaceae	Caryophanales	Bacilli	Bacillota	Bacillati
Rheinheimera salexigens	B	2.5	3	0.5	5	No Class	s	p	Hayashi et al 2018	2018	https://lpsn.dsmz.de/species/rheinheimera-salexigens	Rheinheimera	Chromatiaceae	Chromatiales	Gammaproteobacteria	Pseudomonadota	Pseudomonadati
Roseovarius ramblicola	B	3	3	0.5	10	Moderate	s	p	Castro et al 2018	2018	https://lpsn.dsmz.de/species/roseovarius-ramblicola	Roseovarius	Roseobacteraceae	Rhodobacterales	Alphaproteobacteria	Pseudomonadota	Pseudomonadati
Ruegeria denitrificans	B	3	3	1.5	6	Slight	Marine salts	p	Arahal et al 2018	2018	https://lpsn.dsmz.de/species/ruegeria-denitrificans	Ruegeria	Roseobacteraceae	Rhodobacterales	Alphaproteobacteria	Pseudomonadota	Pseudomonadati
Alteromonas alterisediminis	B	3	4	2	15	Slight	s	p	Cao et al 2018	2018	https://lpsn.dsmz.de/species/alteromonas-alterisediminis	Alteromonas	Alteromonadaceae	Alteromonadales	Gammaproteobacteria	Pseudomonadota	Pseudomonadati
Pseudogracilibacillus endophyticus	B	4	4	0	8	Moderate	s	p	Park et al 2018	2018	https://lpsn.dsmz.de/species/pseudogracilibacillus-endophyticus	Pseudogracilibacillus	Bacillaceae	Caryophanales	Bacilli	Bacillota	Bacillati
Salinisphaera aquimarina	B	4	4	1	18	Moderate	s	p	Tang et al 2018	2018	https://lpsn.dsmz.de/species/salinisphaera-aquimarina	Salinisphaera	Salinisphaeraceae	Nevskiales	Gammaproteobacteria	Pseudomonadota	Pseudomonadati
Bacillus shivajii	B	3	5	0.5	10	Tolerant	s	p	Kumar et al 2018	2018	https://lpsn.dsmz.de/species/bacillus-shivajii	Bacillus	Bacillaceae	Caryophanales	Bacilli	Bacillota	Bacillati
Georgenia deserti	B	0	5	0	17	Tolerant	s	p	Hozzein et al 2018	2018	https://lpsn.dsmz.de/species/georgenia-deserti	Georgenia	Bogoriellaceae	Micrococcales	Actinomycetes	Actinomycetota	Bacillati
Microbacterium album	B	0	5	0	8	Tolerant	s	p	Yang et al 2018	2018	https://lpsn.dsmz.de/species/microbacterium-album	Microbacterium	Microbacteriaceae	Micrococcales	Actinomycetes	Actinomycetota	Bacillati
Microbacterium deserti	B	0	5	0	8	Tolerant	s	p	Yang et al 2018	2018	https://lpsn.dsmz.de/species/microbacterium-deserti	Microbacterium	Microbacteriaceae	Micrococcales	Actinomycetes	Actinomycetota	Bacillati
Planococcus salinus	B	3	5	3	15	Moderate	s	p	Gan et al 2018	2018	https://lpsn.dsmz.de/species/planococcus-salinus	Planococcus	Caryophanaceae	Caryophanales	Bacilli	Bacillota	Bacillati
Salegentibacter sediminis	B	5	5	1	10	Moderate	s	p	Liang et al 2018	2018	https://lpsn.dsmz.de/species/salegentibacter-sediminis	Salegentibacter	Flavobacteriaceae	Flavobacteriales	Flavobacteriia	Bacteroidota	Pseudomonadati
Salipaludibacillus halalkaliphilus	B	5	5	0.5	15	Moderate	s	p	Amoozegar et al 2018	2018	https://lpsn.dsmz.de/species/salipaludibacillus-halalkaliphilus	Salipaludibacillus	Bacillaceae	Caryophanales	Bacilli	Bacillota	Bacillati
Halomonas litopenaei	B	3	6	0.5	22	Moderate	s	p	Xue et al 2018	2018	https://lpsn.dsmz.de/species/halomonas-litopenaei	Halomonas	Halomonadaceae	Oceanospirillales	Gammaproteobacteria	Pseudomonadota	Pseudomonadati
Roseovarius salinarum	B	6	6	2	15	No Class	s	p	Wang et al 2018	2018	https://lpsn.dsmz.de/species/roseovarius-salinarum	Roseovarius	Roseobacteraceae	Rhodobacterales	Alphaproteobacteria	Pseudomonadota	Pseudomonadati
Virgibacillus indicus	B	3	7	0	15	Moderate	s	p	Xu et al 2018	2018	https://lpsn.dsmz.de/species/virgibacillus-indicus	Virgibacillus	Bacillaceae	Caryophanales	Bacilli	Bacillota	Bacillati
Virgibacillus profundi	B	3	7	0.5	15	Moderate	s	p	Xu et al 2018	2018	https://lpsn.dsmz.de/species/virgibacillus-profundi	Virgibacillus	Bacillaceae	Caryophanales	Bacilli	Bacillota	Bacillati
Marinobacter bohaiensis	B	6	10	1	15	Moderate	s	p	Xu et al 2018	2018	https://lpsn.dsmz.de/species/marinobacter-bohaiensis	Marinobacter	Alteromonadaceae	Alteromonadales	Gammaproteobacteria	Pseudomonadota	Pseudomonadati
Saccharopolyspora deserti	B	5	10	0	22	Tolerant	s	p	Yang et al 2018	2018	https://lpsn.dsmz.de/species/saccharopolyspora-deserti	Saccharopolyspora	Pseudonocardiaceae	Pseudonocardiales	Actinomycetes	Actinomycetota	Bacillati
Salibacterium nitratireducens	B	10	10	0	12	Tolerant	s	p	Singh et al 2018	2018	https://lpsn.dsmz.de/species/salibacterium-nitratireducens	Salibacterium	Bacillaceae	Caryophanales	Bacilli	Bacillota	Bacillati
Virgibacillus phasianinus	B	10	10	0	20	No Class	s	p	Tak et al 2018	2018	https://lpsn.dsmz.de/species/virgibacillus-phasianinus	Virgibacillus	Bacillaceae	Caryophanales	Bacilli	Bacillota	Bacillati
Halomonas saliphila	B	10	15	0	17	Moderate	s	p	Gan et al. 2018	2018	https://lpsn.dsmz.de/species/halomonas-saliphila	Halomonas	Halomonadaceae	Oceanospirillales	Gammaproteobacteria	Pseudomonadota	Pseudomonadati
Ornithinibacillus salinisoli	B	10	15	3	17	Moderate	s	p	Gan et al 2018	2018	https://lpsn.dsmz.de/species/ornithinibacillus-salinisoli	Ornithinibacillus	Bacillaceae	Caryophanales	Bacilli	Bacillota	Bacillati
Salibacterium lacus	B	24	24	8	28	No Class	s	p	Wang et al 2018	2018	https://lpsn.dsmz.de/species/salibacterium-lacus	Salibacterium	Bacillaceae	Caryophanales	Bacilli	Bacillota	Bacillati
Desmonostoc salinum	B			0	0.25	Tolerant	s	m	Alvarenga et al 2018	2018	https://lpsn.dsmz.de/species/desmonostoc-salinum	Desmonostoc	Nostocaceae	Nostocales	Cyanophyceae	Cyanobacteriota	Bacillati
Saliniramus fredricksonii	B			0.1	1.4	No Class	s	m	Cole et al 2018	2018	https://lpsn.dsmz.de/species/saliniramus-fredricksonii	Saliniramus	Salinarimonadaceae	Hyphomicrobiales	Alphaproteobacteria	Pseudomonadota	Pseudomonadati
Salinirubellus salinus	A	2.1	2.1	1.4	4.8	No Class	s	m	Hou et al 2018	2018	https://lpsn.dsmz.de/species/salinirubellus-salinus	Salinirubellus	Halobacteriaceae	Halobacteriales	Halobacteria	Methanobacteriota	Methanobacteriati
Methanonatronarchaeum thermophilum	A	4	5			Extreme	s	m	Sorokin et al 2018	2018	https://lpsn.dsmz.de/species/methanonatronarchaeum-thermophilum	Methanonatronarchaeum	Methanonatronarchaeaceae	Methanonatronarchaeales	Methanonatronarchaeia	Methanobacteriota	Methanobacteriati
Halococcus salsus	A	20	20	10	30	No Class	s	p	Chen et al 2018	2018	https://lpsn.dsmz.de/species/halococcus-salsus	Halococcus	Halococcaceae	Halobacteriales	Halobacteria	Methanobacteriota	Methanobacteriati
Halorubrum aethiopicum	A	20	25	15	30	Extreme	s	p	Gibtan et al 2018	2018	https://lpsn.dsmz.de/species/halorubrum-aethiopicum	Halorubrum	Haloferacaceae	Halobacteriales	Halobacteria	Methanobacteriota	Methanobacteriati
Natrarchaeobaculum aegyptiacum	A	19	27	15	38	Extreme	s	p	Zhao et al 2018	2018	https://lpsn.dsmz.de/species/natrarchaeobaculum-aegyptiacum	Natrarchaeobaculum	Natrialbaceae	Halobacteriales	Halobacteria	Methanobacteriota	Methanobacteriati
Aspergillus olivimuriae	E					Tolerant	s	m	Crognale et al 2019	2019	-	Aspergillus	Trichocomaceae	Eurotiales	Eurotiomycetes	Ascomycota	Fungi
Verrucoconiothyrium ambiguum	E					Tolerant	s	p	Gonçalves et al 2019	2019	-	Verrucoconiothyrium	Montagnulaceae	Pleosporales	Dothideomycetes	Ascomycota	Fungi
Oceanobacillus piezotolerans	B	0	0	0	9	No Class	s	p	Yu et al 2019	2019	https://lpsn.dsmz.de/species/oceanobacillus-piezotolerans	Oceanobacillus	Bacillaceae	Caryophanales	Bacilli	Bacillota	Bacillati
Acidihalobacter aeolianus	B	0.428	0.428	0.06	1.283	Tolerant	s	m	Khaleque et al 2019	2019	https://lpsn.dsmz.de/species/acidihalobacter-aeolianus	Acidihalobacter	Ectothiorhodospiraceae	Chromatiales	Gammaproteobacteria	Pseudomonadota	Pseudomonadati
Acidihalobacter ferrooxydans	B	0.428	0.428	0.06	0.856	Tolerant	s	m	Khaleque et al 2019	2019	https://lpsn.dsmz.de/species/acidihalobacter-ferrooxydans	Acidihalobacter	Ectothiorhodospiraceae	Chromatiales	Gammaproteobacteria	Pseudomonadota	Pseudomonadati
Flavobacterium tibetense	B	1	1	0	3	Tolerant	s	p	Phurbu et al 2019	2019	https://lpsn.dsmz.de/species/flavobacterium-tibetense	Flavobacterium	Flavobacteriaceae	Flavobacteriales	Flavobacteriia	Bacteroidota	Pseudomonadati
Tabrizicola alkalilacus	B	0	1	0	3	Tolerant	s	p	Phurbu et al 2019	2019	https://lpsn.dsmz.de/species/tabrizicola-alkalilacus	Tabrizicola	Paracoccaceae	Rhodobacterales	Alphaproteobacteria	Pseudomonadota	Pseudomonadati
Anaerosacchariphilus polymeriproducens	B	2	2	0	6	Tolerant	s	p	Kim et al 2019	2019	https://lpsn.dsmz.de/species/anaerosacchariphilus-polymeriproducens	Anaerosacchariphilus	Lachnospiraceae	Eubacteriales	Clostridia	Bacillota	Bacillati
Parashewanella tropica	B	2	2	0.5	6	Slight	s	p	Namirimu et al 2019	2019	https://lpsn.dsmz.de/species/parashewanella-tropica	Parashewanella	Shewanellaceae	Alteromonadales	Gammaproteobacteria	Pseudomonadota	Pseudomonadati
Rhodophyticola porphyridii	B	2	2	0	5	Moderate	s	p	Jung et al 2019	2019	https://lpsn.dsmz.de/species/rhodophyticola-porphyridii	Rhodophyticola	Roseobacteraceae	Rhodobacterales	Alphaproteobacteria	Pseudomonadota	Pseudomonadati
Kushneria endophytica	B	2.5	2.5	0.5	25	Moderate	s	p	Navarro-Torre et al 2019	2019	https://lpsn.dsmz.de/species/kushneria-endophytica	Kushneria	Halomonadaceae	Oceanospirillales	Gammaproteobacteria	Pseudomonadota	Pseudomonadati
Ornithinibacillus gellani	B	2.5	2.5	0.5	17.5	No Class	s	p	Qu et al 2019	2019	https://lpsn.dsmz.de/species/ornithinibacillus-gellani	Ornithinibacillus	Bacillaceae	Caryophanales	Bacilli	Bacillota	Bacillati
Bacillus salacetis	B	1	3	0	15	Slight	s	p	Daroonpunt et al 2019	2019	https://lpsn.dsmz.de/species/bacillus-salacetis	Bacillus	Bacillaceae	Caryophanales	Bacilli	Bacillota	Bacillati
Dongshaea marina	B	2	3	1	5	No Class	s	p	Huang et al 2019	2019	https://lpsn.dsmz.de/species/dongshaea-marina	Dongshaea	Aeromonadaceae	Aeromonadales	Gammaproteobacteria	Pseudomonadota	Pseudomonadati
Hwanghaeella grinnelliae	B	2	3	0	12	Moderate	s	p	Kim et al 2019	2019	https://lpsn.dsmz.de/species/hwanghaeella-grinnelliae	Hwanghaeella	Rhodospirillaceae	Rhodospirillales	Alphaproteobacteria	Pseudomonadota	Pseudomonadati
Paraliobacillus zengyii	B	3	3	0	17	Slight	s	p	Wang et al 2019	2019	https://lpsn.dsmz.de/species/paraliobacillus-zengyii	Paraliobacillus	Bacillaceae	Caryophanales	Bacilli	Bacillota	Bacillati
Planomicrobium iranicum	B	3	3	1	7.5	Slight	s	p	Ramezani et al 2019	2019	https://lpsn.dsmz.de/species/planomicrobium-iranicum	Planomicrobium	Caryophanaceae	Caryophanales	Bacilli	Bacillota	Bacillati
Shimia thalassica	B	3	3	2	6	Slight	s	p	Arahal et al 2019	2019	https://lpsn.dsmz.de/species/shimia-thalassica	Shimia	Roseobacteraceae	Rhodobacterales	Alphaproteobacteria	Pseudomonadota	Pseudomonadati
Glaciecola amylolytica	B	4	4	1	8	Slight	s	p	Xiao et al 2019	2019	https://lpsn.dsmz.de/species/glaciecola-amylolytica	Glaciecola	Alteromonadaceae	Alteromonadales	Gammaproteobacteria	Pseudomonadota	Pseudomonadati
Microbulbifer flavimaris	B	2	4	0.5	15	No Class	s	p	Xiong et al 2019	2019	https://lpsn.dsmz.de/species/microbulbifer-flavimaris	Microbulbifer	Microbulbiferaceae	Cellvibrionales	Gammaproteobacteria	Pseudomonadota	Pseudomonadati
Pararhodobacter oceanensis	B	2	4	0.5	9	Moderate	s	p	Wang et al 2019	2019	https://lpsn.dsmz.de/species/pararhodobacter-oceanensis	Pararhodobacter	Paracoccaceae	Rhodobacterales	Alphaproteobacteria	Pseudomonadota	Pseudomonadati
Roseithermus sacchariphilus	B	2	4	0.5	8	No Class	s	p	Park et al 2019	2019	https://lpsn.dsmz.de/species/roseithermus-sacchariphilus	Roseithermus	Rhodothermaceae	Rhodothermales	Rhodothermia	Rhodothermota	Pseudomonadati
Anaerobacillus alkaliphilus	B	5	5	0	7	Moderate	s	p	Borsodi et al 2019	2019	https://lpsn.dsmz.de/species/anaerobacillus-alkaliphilus	Anaerobacillus	Bacillaceae	Caryophanales	Bacilli	Bacillota	Bacillati
Nesterenkonia natronophila	B	5	5	1	15	Moderate	s	p	Machin et al 2019	2019	https://lpsn.dsmz.de/species/nesterenkonia-natronophila	Nesterenkonia	Micrococcaceae	Micrococcales	Actinomycetes	Actinomycetota	Bacillati
Marinobacter maroccanus	B	5	7	2	15	Moderate	s	p	Boujida et al 2019	2019	https://lpsn.dsmz.de/species/marinobacter-maroccanus	Marinobacter	Alteromonadaceae	Alteromonadales	Gammaproteobacteria	Pseudomonadota	Pseudomonadati
Salinicola endophyticus	B	7.5	7.5	0	25	Moderate	s	p	Fidalgo et al 2019	2019	https://lpsn.dsmz.de/species/salinicola-endophyticus	Salinicola	Halomonadaceae	Oceanospirillales	Gammaproteobacteria	Pseudomonadota	Pseudomonadati
Salinicola lusitanus	B	5	7.5	0	30	Moderate	s	p	Fidalgo et al 2019	2019	https://lpsn.dsmz.de/species/salinicola-lusitanus	Salinicola	Halomonadaceae	Oceanospirillales	Gammaproteobacteria	Pseudomonadota	Pseudomonadati
Phytoactinopolyspora halophila	B	5	8	2	24	Moderate	s	p	Ding et al 2019	2019	https://lpsn.dsmz.de/species/phytoactinopolyspora-halophila	Phytoactinopolyspora	Jiangellaceae	Jiangellales	Actinomycetes	Actinomycetota	Bacillati
Vibrio zhugei	B	4	9	1	17	Moderate	s	p	Guo et al 2019	2019	https://lpsn.dsmz.de/species/vibrio-zhugei	Vibrio	Vibrionaceae	Vibrionales	Gammaproteobacteria	Pseudomonadota	Pseudomonadati
Aquibacillus sediminis	B	7	10	0.5	20	Moderate	s	p	Lee and Whang 2019	2019	https://lpsn.dsmz.de/species/aquibacillus-sediminis	Aquibacillus	Bacillaceae	Caryophanales	Bacilli	Bacillota	Bacillati
Salinicola halimionae	B	5	10	0.5	25	Moderate	s	p	Fidalgo et al 2019	2019	https://lpsn.dsmz.de/species/salinicola-halimionae	Salinicola	Halomonadaceae	Oceanospirillales	Gammaproteobacteria	Pseudomonadota	Pseudomonadati
Salinicola halophyticus	B	7.5	10	2.5	20	Moderate	s	p	Fidalgo et al 2019	2019	https://lpsn.dsmz.de/species/salinicola-halophyticus	Salinicola	Halomonadaceae	Oceanospirillales	Gammaproteobacteria	Pseudomonadota	Pseudomonadati
Salinicola aestuarinus	B	10	12.5	2.5	30	Moderate	s	p	Fidalgo et al 2019	2019	https://lpsn.dsmz.de/species/salinicola-aestuarinus	Salinicola	Halomonadaceae	Oceanospirillales	Gammaproteobacteria	Pseudomonadota	Pseudomonadati
Lentibacillus lipolyticus	B	8	16	4	35	Moderate	s	p	Booncharoen et al 2019	2019	https://lpsn.dsmz.de/species/lentibacillus-lipolyticus	Lentibacillus	Bacillaceae	Caryophanales	Bacilli	Bacillota	Bacillati
Desulfovibrio gilichinskyi	B	20	20	5	40	Moderate	s	g	Ryzhmanova et al 2019	2019	https://lpsn.dsmz.de/species/desulfovibrio-gilichinskyi	Desulfovibrio	Desulfovibrionaceae	Desulfovibrionales	Deltaproteobacteria	Pseudomonadota	Pseudomonadati
Halorussus litoreus	A	3.1	3.1	0.9	4.8	No Class	s	m	Han et al 2019	2019	https://lpsn.dsmz.de/species/halorussus-litoreus	Halorussus	Halobacteriaceae	Halobacteriales	Halobacteria	Methanobacteriota	Methanobacteriati
Halostella limicola	A	3.1	3.1	1.7	4.8	No Class	s	m	Han et al 2019	2019	https://lpsn.dsmz.de/species/halostella-limicola	Halostella	Natronoarchaeaceae	Halobacteriales	Halobacteria	Methanobacteriota	Methanobacteriati
Halalkaliarchaeum desulfuricum	A	4	4	2.5	5	Extreme	Na+	m	Sorokin et al 2019	2019	https://lpsn.dsmz.de/species/halalkaliarchaeum-desulfuricum	Halalkaliarchaeum	Haloferacaceae	Halobacteriales	Halobacteria	Methanobacteriota	Methanobacteriati
Halococcoides cellulosivorans	A	3.5	4	2.5	5	Extreme	s	m	Sorokin et al 2019	2019	https://lpsn.dsmz.de/species/halococcoides-cellulosivorans	Halococcoides	Haloarculaceae	Halobacteriales	Halobacteria	Methanobacteriota	Methanobacteriati
Natrarchaeobaculum sulfurireducens	A	3.5	4	2.5	5	Extreme	Na+	m	Sorokin et al 2019	2019	https://lpsn.dsmz.de/species/natrarchaeobaculum-sulfurireducens	Natrarchaeobaculum	Natrialbaceae	Halobacteriales	Halobacteria	Methanobacteriota	Methanobacteriati
Haloarcula sebkhae	A	4.3	5.1	1.7	5.1	Extreme	s	m	Barreteau et al 2019	2019	https://lpsn.dsmz.de/species/haloarcula-sebkhae	Haloarcula	Haloarculaceae	Halobacteriales	Halobacteria	Methanobacteriota	Methanobacteriati
Halonotius aquaticus	A	25	25	15	30	Extreme	s	p	Duráan-Viseras et al 2019	2019	https://lpsn.dsmz.de/species/halonotius-aquaticus	Halonotius	Haloferacaceae	Halobacteriales	Halobacteria	Methanobacteriota	Methanobacteriati
Halorientalis pallida	A	25	25	15	30	Extreme	s	p	Duráan-Viseras et al 2019	2019	https://lpsn.dsmz.de/species/halorientalis-pallida	Halorientalis	Haloarculaceae	Halobacteriales	Halobacteria	Methanobacteriota	Methanobacteriati
Neoascochyta fuci	E					Slight	Sais Marinhos	p	Gonçalves et al 2020	2020	-	Neoascochyta	Didymellaceae	Pleosporales	Dothideomycetes	Ascomycota	Fungi
Paraconiothyrium salinum	E					Slight	Sais Marinhos	p	Gonçalves et al 2020	2020	-	Paraconiothyrium	Montagnulaceae	Pleosporales	Dothideomycetes	Ascomycota	Fungi
Acidihalobacter yilgarnensis	B	0.428	0.428	0	1.283	Tolerant	s	m	Khaleque et al 2020	2020	https://lpsn.dsmz.de/species/acidihalobacter-yilgarnensis	Acidihalobacter	Ectothiorhodospiraceae	Chromatiales	Gammaproteobacteria	Pseudomonadota	Pseudomonadati
Aestuariirhabdus litorea	B	2	2	1	6	Moderate	s	p	Khan et al 2020	2020	https://lpsn.dsmz.de/species/aestuariirhabdus-litorea	Aestuariirhabdus	Aestuariirhabdaceae	Oceanospirillales	Gammaproteobacteria	Pseudomonadota	Pseudomonadati
Marinobacter fonticola	B	1	2	0	19	Tolerant	s	p	Sun et al 2020	2020	https://lpsn.dsmz.de/species/marinobacter-fonticola	Marinobacter	Alteromonadaceae	Alteromonadales	Gammaproteobacteria	Pseudomonadota	Pseudomonadati
Microbacterium algeriense	B	2	2	0.3	3.5	Tolerant	s	p	Lenchi et al 2020	2020	https://lpsn.dsmz.de/species/microbacterium-algeriense	Microbacterium	Microbacteriaceae	Micrococcales	Actinomycetes	Actinomycetota	Bacillati
Roseovarius gahaiensis	B	2	2	0.5	20	No Class	s	p	Sun et al 2020	2020	https://lpsn.dsmz.de/species/roseovarius-gahaiensis	Roseovarius	Roseobacteraceae	Rhodobacterales	Alphaproteobacteria	Pseudomonadota	Pseudomonadati
Sphaerochaeta halotolerans	B	1	2	0	7.5	Tolerant	s	p	Bizhieva et al 2020	2020	https://lpsn.dsmz.de/species/sphaerochaeta-halotolerans	Sphaerochaeta	Sphaerochaetaceae	Spirochaetales	Spirochaetia	Spirochaetota	Pseudomonadati
Halomonas radicis	B	2.5	2.5	0	25	Tolerant	s	p	Navarro-Torre et al 2020	2020	https://lpsn.dsmz.de/species/halomonas-radicis	Halomonas	Halomonadaceae	Oceanospirillales	Gammaproteobacteria	Pseudomonadota	Pseudomonadati
Psychrobacillus vulpis	B	2.5	2.5	0	5.5	Slight	s	p	Rodríguez et al 2020	2020	https://lpsn.dsmz.de/species/psychrobacillus-vulpis	Psychrobacillus	Caryophanaceae	Caryophanales	Bacilli	Bacillota	Bacillati
Thalassocella blandensis	B	2.5	2.5	1.5	9	Slight	Total salts	p	Lucena et al 2020	2020	https://lpsn.dsmz.de/species/thalassocella-blandensis	Thalassocella	Cellvibrionaceae	Cellvibrionales	Gammaproteobacteria	Pseudomonadota	Pseudomonadati
Arenibacterium halophilum	B	3	3	0	10	Tolerant	s	p	Baek et al 2020	2020	https://lpsn.dsmz.de/species/arenibacterium-halophilum	Arenibacterium	Roseobacteraceae	Rhodobacterales	Alphaproteobacteria	Pseudomonadota	Pseudomonadati
Bacillus salinus	B	2	3	1	9	Tolerant	s	p	Kang et al 2020	2020	https://lpsn.dsmz.de/species/bacillus-salinus	Bacillus	Bacillaceae	Caryophanales	Bacilli	Bacillota	Bacillati
Maribacter algicola	B	2	3	0.5	5	Moderate	s	p	Khan et al 2020	2020	https://lpsn.dsmz.de/species/maribacter-algicola	Maribacter	Flavobacteriaceae	Flavobacteriales	Flavobacteriia	Bacteroidota	Pseudomonadati
Microbulbifer harenosus	B	2	3	2	11	No Class	s	p	Huang et al 2020	2020	https://lpsn.dsmz.de/species/microbulbifer-harenosus	Microbulbifer	Microbulbiferaceae	Cellvibrionales	Gammaproteobacteria	Pseudomonadota	Pseudomonadati
Nitrincola iocasae	B	1	3	1	11	Slight	s	p	Zhang et al 2020	2020	https://lpsn.dsmz.de/species/nitrincola-iocasae	Nitrincola	Oceanospirillaceae	Oceanospirillales	Gammaproteobacteria	Pseudomonadota	Pseudomonadati
Paramesonia marina	B	3	3	0.5	10	Moderate	s	p	Wang et al 2020	2020	https://lpsn.dsmz.de/species/paramesonia-marina	Paramesonia	Flavobacteriaceae	Flavobacteriales	Flavobacteriia	Bacteroidota	Pseudomonadati
Rubrobacter marinus	B	3	3	1	6	Slight	s	p	Chen et al 2020	2020	https://lpsn.dsmz.de/species/rubrobacter-marinus	Rubrobacter	Rubrobacteraceae	Rubrobacterales	Rubrobacteria	Actinomycetota	Bacillati
Rubrobacter tropicus	B	3	3	1	4	Slight	s	p	Chen et al 2020	2020	https://lpsn.dsmz.de/species/rubrobacter-tropicus	Rubrobacter	Rubrobacteraceae	Rubrobacterales	Rubrobacteria	Actinomycetota	Bacillati
Mesonia oceanica	B	2	4	1	15	Slight	s	p	Lucena et al 2020	2020	https://lpsn.dsmz.de/species/mesonia-oceanica	Mesonia	Flavobacteriaceae	Flavobacteriales	Flavobacteriia	Bacteroidota	Pseudomonadati
Alcanivorax sediminis	B	3	5	0	15	Moderate	s	p	Liao et al 2020	2020	https://lpsn.dsmz.de/species/alcanivorax-sediminis	Alcanivorax	Alcanivoracaceae	Oceanospirillales	Gammaproteobacteria	Pseudomonadota	Pseudomonadati
Alteribacter natronophilus	B	5	5	0.5	15	Moderate	s	p	Menes et al 2020	2020	https://lpsn.dsmz.de/species/alteribacter-natronophilus	Alteribacter	Bacillaceae	Caryophanales	Bacilli	Bacillota	Bacillati
Alteromonas iocasae	B	3	5	2	20	Moderate	s	p	Zhang et al 2020	2020	https://lpsn.dsmz.de/species/alteromonas-iocasae	Alteromonas	Alteromonadaceae	Alteromonadales	Gammaproteobacteria	Pseudomonadota	Pseudomonadati
Halomonas lysinitropha	B	5	5	3	15	Moderate	s	p	Ramezani et al 2020	2020	https://lpsn.dsmz.de/species/halomonas-lysinitropha	Halomonas	Halomonadaceae	Oceanospirillales	Gammaproteobacteria	Pseudomonadota	Pseudomonadati
Phytoactinopolyspora mesophila	B	2	5	1	11	Moderate	s	p	Feng et al 2020	2020	https://lpsn.dsmz.de/species/phytoactinopolyspora-mesophila	Phytoactinopolyspora	Jiangellaceae	Jiangellales	Actinomycetes	Actinomycetota	Bacillati
Roseovarius bejariae	B	5	5	0.5	15	Moderate	s	p	Castro et al 2020	2020	https://lpsn.dsmz.de/species/roseovarius-bejariae	Roseovarius	Roseobacteraceae	Rhodobacterales	Alphaproteobacteria	Pseudomonadota	Pseudomonadati
Limihaloglobus sulfuriphilus	B	6	6	3	10	Moderate	s	p	Pradel et al 2020	2020	https://lpsn.dsmz.de/species/limihaloglobus-sulfuriphilus	Limihaloglobus	Sedimentisphaeraceae	Sedimentisphaerales	Phycisphaerae	Planctomycetota	Pseudomonadati
Marinobacter halodurans	B	6	6	1	18	No Class	s	p	Yoo et al 2020	2020	https://lpsn.dsmz.de/species/marinobacter-halodurans	Marinobacter	Alteromonadaceae	Alteromonadales	Gammaproteobacteria	Pseudomonadota	Pseudomonadati
Marinobacter vulgaris	B	3	6	0.5	18	Moderate	s	p	Zhang et al 2020	2020	https://lpsn.dsmz.de/species/marinobacter-vulgaris	Marinobacter	Alteromonadaceae	Alteromonadales	Gammaproteobacteria	Pseudomonadota	Pseudomonadati
Marisediminitalea mangrovi	B	3	6	1	9	Slight	s	p	Zhang et al 2020	2020	https://lpsn.dsmz.de/species/marisediminitalea-mangrovi	Marisediminitalea	Alteromonadaceae	Alteromonadales	Gammaproteobacteria	Pseudomonadota	Pseudomonadati
Natronospirillum operosum	B	3.5	6	1	20	No Class	s	p	Kevbrin et al 2020	2020	https://lpsn.dsmz.de/species/natronospirillum-operosum	Natronospirillum	Natronospirillaceae	Oceanospirillales	Gammaproteobacteria	Pseudomonadota	Pseudomonadati
Halomonas piezotolerans	B	3	7	0.5	21	Slight	s	p	Yan et al 2020	2020	https://lpsn.dsmz.de/species/halomonas-piezotolerans	Halomonas	Halomonadaceae	Oceanospirillales	Gammaproteobacteria	Pseudomonadota	Pseudomonadati
Sediminibacillus terrae	B	4	7	0.5	20	Moderate	s	p	Wu et al 2020	2020	https://lpsn.dsmz.de/species/sediminibacillus-terrae	Sediminibacillus	Bacillaceae	Caryophanales	Bacilli	Bacillota	Bacillati
Halomonas urmiana	B	7.5	7.5	0.5	20	Moderate	s	p	Khan et al 2020	2020	https://lpsn.dsmz.de/species/halomonas-urmiana	Halomonas	Halomonadaceae	Oceanospirillales	Gammaproteobacteria	Pseudomonadota	Pseudomonadati
Marinobacter denitrificans	B	7.5	7.5	3	25	No Class	s	p	Zhang et al 2020	2020	https://lpsn.dsmz.de/species/marinobacter-denitrificans	Marinobacter	Alteromonadaceae	Alteromonadales	Gammaproteobacteria	Pseudomonadota	Pseudomonadati
Halalkalibacillus sediminis	B	6	9	0	22	Moderate	s	p	He et al 2020	2020	https://lpsn.dsmz.de/species/halalkalibacillus-sediminis	Halalkalibacillus	Bacillaceae	Caryophanales	Bacilli	Bacillota	Bacillati
Fodinibius saliphilus	B	10	10	3	25	Moderate	s	p	Cho and Whang 2020	2020	https://lpsn.dsmz.de/species/fodinibius-saliphilus	Fodinibius	Balneolaceae	Balneolales	Balneolia	Balneolota	Pseudomonadati
Halomonas lactosivorans	B	4	10	1	12	No Class	s	p	Ming et al 2020	2020	https://lpsn.dsmz.de/species/halomonas-lactosivorans	Halomonas	Halomonadaceae	Oceanospirillales	Gammaproteobacteria	Pseudomonadota	Pseudomonadati
Halomonas pellis	B	10	10	1	17	Moderate	s	p	Li et al 2020	2020	https://lpsn.dsmz.de/species/halomonas-pellis	Halomonas	Halomonadaceae	Oceanospirillales	Gammaproteobacteria	Pseudomonadota	Pseudomonadati
Anaerohalosphaera lusitana	B	12	12	5	15	Moderate	s	p	Pradel et al 2020	2020	https://lpsn.dsmz.de/species/anaerohalosphaera-lusitana	Anaerohalosphaera	Anaerohalosphaeraceae	Sedimentisphaerales	Phycisphaerae	Planctomycetota	Pseudomonadati
Aidingimonas lacisalsi	B	10	13	5	25	Moderate	s	p	Guan et al 2020	2020	https://lpsn.dsmz.de/species/aidingimonas-lacisalsi	Aidingimonas	Halomonadaceae	Oceanospirillales	Gammaproteobacteria	Pseudomonadota	Pseudomonadati
Methanolobus halotolerans	A	0.51	0.51	0	1.55	Tolerant	s	m	Shen et al 2020	2020	https://lpsn.dsmz.de/species/methanolobus-halotolerans	Methanolobus	Methanosarcinaceae	Methanosarcinales	Methanosarcinia	Methanobacteriota	Methanobacteriati
Halostella litorea	A	2.6	2.6	1.4	4.8	No Class	s	m	Han and Cui 2021	2020	https://lpsn.dsmz.de/species/halostella-litorea	Halostella	Natronoarchaeaceae	Halobacteriales	Halobacteria	Methanobacteriota	Methanobacteriati
Halostella pelagica	A	2.6	2.6	1.4	4.8	No Class	s	m	Han and Cui 2020	2020	https://lpsn.dsmz.de/species/halostella-pelagica	Halostella	Natronoarchaeaceae	Halobacteriales	Halobacteria	Methanobacteriota	Methanobacteriati
Halobacterium bonnevillei	A	3	3	2	5.4	Extreme	s	m	Myers and King 2020	2020	https://lpsn.dsmz.de/species/halobacterium-bonnevillei	Halobacterium	Halobacteriaceae	Halobacteriales	Halobacteria	Methanobacteriota	Methanobacteriati
Halobaculum saliterrae	A	3	3	2	5.4	No Class	s	m	Myers and King 2020	2020	https://lpsn.dsmz.de/species/halobaculum-saliterrae	Halobaculum	Haloferacaceae	Halobacteriales	Halobacteria	Methanobacteriota	Methanobacteriati
Salinibaculum litoreum	A	3.1	3.1	0.9	4.8	No Class	s	m	Han and Cui 2020	2020	https://lpsn.dsmz.de/species/salinibaculum-litoreum	Salinibaculum	Halobacteriaceae	Halobacteriales	Halobacteria	Methanobacteriota	Methanobacteriati
Natronolimnohabitans innermongolicus	A	3.5	3.5	2.5	4.5	Extreme	s	m	Sorokin et al 2020	2020	https://lpsn.dsmz.de/species/natronolimnohabitans-innermongolicus	Natronolimnohabitans	Natrialbaceae	Halobacteriales	Halobacteria	Methanobacteriota	Methanobacteriati
Haloarcula mannanilytica	A	3.6	3.6	1.5	4.6	No Class	s	m	Enomoto et al 2020	2020	https://lpsn.dsmz.de/species/haloarcula-mannanilytica	Haloarcula	Haloarculaceae	Halobacteriales	Halobacteria	Methanobacteriota	Methanobacteriati
Halovenus carboxidivorans	A	4	4	3	5.4	Extreme	s	m	Myers and King 2020	2020	https://lpsn.dsmz.de/species/halovenus-carboxidivorans	Halovenus	Halobacteriaceae	Halobacteriales	Halobacteria	Methanobacteriota	Methanobacteriati
Halomicrococcus hydrotolerans	A	20	20	10	30	Extreme	s	p	Chen et al 2020	2020	https://lpsn.dsmz.de/species/halomicrococcus-hydrotolerans	Halomicrococcus	Halobacteriaceae	Halobacteriales	Halobacteria	Methanobacteriota	Methanobacteriati
Salinigranum halophilum	A	18	20	5	30	No Class	s	p	Zhao et al 2020	2020	https://lpsn.dsmz.de/species/salinigranum-halophilum	Salinigranum	Haloferacaceae	Halobacteriales	Halobacteria	Methanobacteriota	Methanobacteriati
Haloarcula amylovorans	A	23	23	8	30	No Class	s	p	Chen et al 2020	2020	https://lpsn.dsmz.de/species/haloarcula-amylovorans	Haloarcula	Haloarculaceae	Halobacteriales	Halobacteria	Methanobacteriota	Methanobacteriati
Natrialba swarupiae	A	25	25	20	35	No Class	s	p	Kajale et al 2020	2020	https://lpsn.dsmz.de/species/natrialba-swarupiae	Natrialba	Natrialbaceae	Halobacteriales	Halobacteria	Methanobacteriota	Methanobacteriati
Peribacillus faecalis	B	10	10	0	18	Moderate	s	p	Jiang et al 2021	2021	https://lpsn.dsmz.de/species/peribacillus-faecalis	Peribacillus	Bacillaceae	Caryophanales	Bacilli	Bacillota	Bacillati
Natronoglycomyces albus	B	0.1	0.3	0.1	3	Tolerant	Na+	m	Sorokin et al 2021	2021	https://lpsn.dsmz.de/species/natronoglycomyces-albus	Natronoglycomyces	Glycomycetaceae	Glycomycetales	Actinomycetes	Actinomycetota	Bacillati
Alkalicella caledoniensis	B	0	1	0	7	Tolerant	s	p	Quéméneur et al 2021	2021	https://lpsn.dsmz.de/species/alkalicella-caledoniensis	Alkalicella	Proteinivoracaceae	Eubacteriales	Clostridia	Bacillota	Bacillati
Lunatibacter salilacus	B	2	2	0	7	Slight	s	p	Han et al 2021	2021	https://lpsn.dsmz.de/species/lunatibacter-salilacus	Lunatibacter	Cyclobacteriaceae	Cytophagales	Cytophagia	Bacteroidota	Pseudomonadati
Occultella aeris	B	0.5	2	0.5	6	Moderate	s	p	Schumann et al 2021	2021	https://lpsn.dsmz.de/species/occultella-aeris	Occultella	Ruaniaceae	Micrococcales	Actinomycetes	Actinomycetota	Bacillati
Rossellomorea arthrocnemi	B	2.5	2.5	0	25	Tolerant	s	p	Navarro-Torre et al 2021	2021	https://lpsn.dsmz.de/species/rossellomorea-arthrocnemi	Rossellomorea	Bacillaceae	Caryophanales	Bacilli	Bacillota	Bacillati
Acuticoccus mangrovi	B	2	3	1	10	Moderate	s	p	Li et al 2021	2021	https://lpsn.dsmz.de/species/acuticoccus-mangrovi	Acuticoccus	Acuticoccaceae	Hyphomicrobiales	Alphaproteobacteria	Pseudomonadota	Pseudomonadati
Marinobacter mangrovi	B	2	3	0	18	Tolerant	s	p	Yi et al 2021	2021	https://lpsn.dsmz.de/species/marinobacter-mangrovi	Marinobacter	Alteromonadaceae	Alteromonadales	Gammaproteobacteria	Pseudomonadota	Pseudomonadati
Motilimonas cestriensis	B	1	3	0.5	10	Slight	s	p	Kelbrick et al 2021	2021	https://lpsn.dsmz.de/species/motilimonas-cestriensis	Motilimonas	Incertae sedis	Alteromonadales	Gammaproteobacteria	Pseudomonadota	Pseudomonadati
Oricola thermophila	B	3	3	1	6	Slight	s	p	Yang et al 2021	2021	https://lpsn.dsmz.de/species/oricola-thermophila	Oricola	Phyllobacteriaceae	Hyphomicrobiales	Alphaproteobacteria	Pseudomonadota	Pseudomonadati
Lolliginicoccus lacisalsi	B	0	4	0	10	Tolerant	s	p	Yang et al 2021	2021	https://lpsn.dsmz.de/species/lolliginicoccus-lacisalsi	Lolliginicoccus	Nocardiaceae	Mycobacteriales	Actinomycetes	Actinomycetota	Bacillati
Photobacterium arenosum	B	0	4	0	6	No Class	s	p	Weerawongwiwat et al 2021	2021	https://lpsn.dsmz.de/species/photobacterium-arenosum	Photobacterium	Vibrionaceae	Vibrionales	Gammaproteobacteria	Pseudomonadota	Pseudomonadati
Desulfovibrio subterraneus	B	0.5	5	0	40	Tolerant	s	g	Ueno et al 2021	2021	https://lpsn.dsmz.de/species/desulfovibrio-subterraneus	Desulfovibrio	Desulfovibrionaceae	Desulfovibrionales	Deltaproteobacteria	Pseudomonadota	Pseudomonadati
Halomonas azerbaijanica	B	3	5	0	12	Slight	s	p	Kazemi et al 2021	2021	https://lpsn.dsmz.de/species/halomonas-azerbaijanica	Halomonas	Halomonadaceae	Oceanospirillales	Gammaproteobacteria	Pseudomonadota	Pseudomonadati
Kaustia mangrovi	B	3	5	2	14	Moderate	s	p	Sefrji et al 2021	2021	https://lpsn.dsmz.de/species/kaustia-mangrovi	Kaustia	Parvibaculaceae	Hyphomicrobiales	Alphaproteobacteria	Pseudomonadota	Pseudomonadati
Paraliobacillus salinarum	B	5	5	2	15	Slight	s	p	Yin et al 2021	2021	https://lpsn.dsmz.de/species/paraliobacillus-salinarum	Paraliobacillus	Bacillaceae	Caryophanales	Bacilli	Bacillota	Bacillati
Alkalicaulis satelles	B	2	6	0	14	Moderate	s	p	Kevbrin et al 2021	2021	https://lpsn.dsmz.de/species/alkalicaulis-satelles	Alkalicaulis	Maricaulaceae	Caulobacterales	Alphaproteobacteria	Pseudomonadota	Pseudomonadati
Kushneria phosphatilytica	B	6	6	0.5	20	No Class	s	p	Du et al 2021	2021	https://lpsn.dsmz.de/species/kushneria-phosphatilytica	Kushneria	Halomonadaceae	Oceanospirillales	Gammaproteobacteria	Pseudomonadota	Pseudomonadati
Aquibacillus kalidii	B	5	8	0	14	Moderate	s	p	Wang et al 2021	2021	https://lpsn.dsmz.de/species/aquibacillus-kalidii	Aquibacillus	Bacillaceae	Caryophanales	Bacilli	Bacillota	Bacillati
Halomonas diversa	B	2	8	0	19	Moderate	s	p	Wang et al 2021	2021	https://lpsn.dsmz.de/species/halomonas-diversa	Halomonas	Halomonadaceae	Oceanospirillales	Gammaproteobacteria	Pseudomonadota	Pseudomonadati
Halomonas icarae	B	2	8	0	24	Moderate	s	p	Pandiyan et al 2021	2021	https://lpsn.dsmz.de/species/halomonas-icarae	Halomonas	Halomonadaceae	Oceanospirillales	Gammaproteobacteria	Pseudomonadota	Pseudomonadati
Ruania rhizosphaerae	B	0	8	0	11	Moderate	s	p	Lu et al 2021	2021	https://lpsn.dsmz.de/species/ruania-rhizosphaerae	Ruania	Ruaniaceae	Micrococcales	Actinomycetes	Actinomycetota	Bacillati
Mangrovivirga cuniculi	B	7	9	3	11	Moderate	s	p	Sefrji et al 2021	2021	https://lpsn.dsmz.de/species/mangrovivirga-cuniculi	Mangrovivirga	Mangrovivirgaceae	Cytophagales	Cytophagia	Bacteroidota	Pseudomonadati
Halobacillus fulvus	B	10	15	2	33	Moderate	s	p	Booncharoen et al 2021	2021	https://lpsn.dsmz.de/species/halobacillus-fulvus	Halobacillus	Bacillaceae	Caryophanales	Bacilli	Bacillota	Bacillati
Halosimplex salinum	A	3.1	3.1	2.1	4.8	No Class	s	m	Yang et al 2021	2021	https://lpsn.dsmz.de/species/halosimplex-salinum	Halosimplex	Haloarculaceae	Halobacteriales	Halobacteria	Methanobacteriota	Methanobacteriati
Halobaculum halophilum	A	3.9	3.9	1.7	4.8	No Class	s	m	Cui et al 2022	2021	https://lpsn.dsmz.de/species/halobaculum-halophilum	Halobaculum	Haloferacaceae	Halobacteriales	Halobacteria	Methanobacteriota	Methanobacteriati
Halobaculum salinum	A	4.3	4.3	1.7	4.8	No Class	s	m	Cui et al 2022	2021	https://lpsn.dsmz.de/species/halobaculum-salinum	Halobaculum	Haloferacaceae	Halobacteriales	Halobacteria	Methanobacteriota	Methanobacteriati
Halosimplex halophilum	A	4.3	4.3	1.4	5.1	No Class	s	m	Yang et al 2021	2021	https://lpsn.dsmz.de/species/halosimplex-halophilum	Halosimplex	Haloarculaceae	Halobacteriales	Halobacteria	Methanobacteriota	Methanobacteriati
Salinadaptatus halalkaliphilus	A	4.4	4.4	2.6	5.3	No Class	s	m	Xue et al 2021	2021	https://lpsn.dsmz.de/species/salinadaptatus-halalkaliphilus	Salinadaptatus	Natrialbaceae	Halobacteriales	Halobacteria	Methanobacteriota	Methanobacteriati
